# Supplementary material for: Integration of HIV and maternal healthcare in a high HIV-prevalence setting: analysis of client flow data over time in Swaziland
Source: PubMed Central journal article supplement — BMJ Open. 2014 Mar 7;4(3):e003715. doi: 10.1136/bmjopen-2013-003715 (PMC3948459; doi:10.1136/bmjopen-2013-003715), 2014-03-07
Supplement: bmjopen-2013-003715.draft_revisions.pdf [file bmjopen-2013-003715.draft_revisions.pdf]

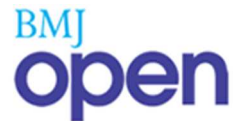

**Integration of HIV and maternal health care in a high HIV-prevalence setting: Analysis of client flow data over time in Swaziland**

|                                 |                                                                                                                                                                                                                                                                                                                                                                                                                                                                                                                                                                                                                                                                                                                                                                                      |
|---------------------------------|--------------------------------------------------------------------------------------------------------------------------------------------------------------------------------------------------------------------------------------------------------------------------------------------------------------------------------------------------------------------------------------------------------------------------------------------------------------------------------------------------------------------------------------------------------------------------------------------------------------------------------------------------------------------------------------------------------------------------------------------------------------------------------------|
| Journal:                        | <i>BMJ Open</i>                                                                                                                                                                                                                                                                                                                                                                                                                                                                                                                                                                                                                                                                                                                                                                      |
| Manuscript ID:                  | bmjopen-2013-003715                                                                                                                                                                                                                                                                                                                                                                                                                                                                                                                                                                                                                                                                                                                                                                  |
| Article Type:                   | Research                                                                                                                                                                                                                                                                                                                                                                                                                                                                                                                                                                                                                                                                                                                                                                             |
| Date Submitted by the Author:   | 02-Aug-2013                                                                                                                                                                                                                                                                                                                                                                                                                                                                                                                                                                                                                                                                                                                                                                          |
| Complete List of Authors:       | Birdthistle, Isolde; London School of Hygiene & Tropical Medicine, Department of Population Health<br>Mayhew, Susannah; London School of Hygiene & Tropical Medicine, Department of Global Health & Development<br>Kikuvi, Joshua; London School of Hygiene & Tropical Medicine, Department of Global Health & Development<br>Zhou, Weiwei; London School of Hygiene & Tropical Medicine, Department of Global Health & Development<br>Church, Kathryn; London School of Hygiene & Tropical Medicine, Department of Global Health & Development<br>Warren, Charlotte; Population Council,<br>Nkambule, Rejoice; Government of the Kingdom of Swaziland, Ministry of Health<br>Fenty, Justin; London School of Hygiene & Tropical Medicine, Department of Global Health & Development |
| <b>Primary Subject Heading</b>: | Health services research                                                                                                                                                                                                                                                                                                                                                                                                                                                                                                                                                                                                                                                                                                                                                             |
| Secondary Subject Heading:      | Global health, HIV/AIDS, Research methods, Reproductive medicine, Sexual health                                                                                                                                                                                                                                                                                                                                                                                                                                                                                                                                                                                                                                                                                                      |
| Keywords:                       | HIV & AIDS < INFECTIOUS DISEASES, Maternal medicine < OBSTETRICS, REPRODUCTIVE MEDICINE, SEXUAL MEDICINE                                                                                                                                                                                                                                                                                                                                                                                                                                                                                                                                                                                                                                                                             |
|                                 |                                                                                                                                                                                                                                                                                                                                                                                                                                                                                                                                                                                                                                                                                                                                                                                      |

SCHOLARONE™  
Manuscripts

**Title**

Integration of HIV and maternal health care in a high HIV-prevalence setting: Analysis of client flow data over time in Swaziland

**Authors and Affiliations**

Isolde J Birdthistle<sup>a</sup>, Susannah Mayhew<sup>b</sup>, Joshua Kikvi<sup>b,c</sup>, Weiwei Zhou<sup>b</sup>, Kathryn Church<sup>b</sup>, Charlotte Warren<sup>c</sup>, Rejoice Nkambule<sup>d</sup>, Justin Fenty<sup>b</sup> on behalf of the Integra Initiative

<sup>a</sup> Department of Population Health, London School of Hygiene & Tropical Medicine, London, UK

<sup>b</sup> Department of Global Health and Development, London School of Hygiene & Tropical Medicine, London, UK

<sup>c</sup> Population Council, Kenya

<sup>d</sup> Ministry of Health, Government of the Kingdom of Swaziland

**Corresponding author:**

Isolde J Birdthistle

Department of Population Health

Faculty of Epidemiology and Population Health

London School of Hygiene & Tropical Medicine

Room 145, Keppel Street, London, WC1E 7HT

E-mail: [Isolde.Birdthistle@lshtm.ac.uk](mailto:Isolde.Birdthistle@lshtm.ac.uk) Tel: +44 (0)20 7612 7889 Fax: +44 (0)20 7436 5389

**Word count:** 3190

## ABSTRACT

### Objective

Maternal and child health (MCH) care may provide an entry point for HIV services in high HIV-prevalence settings. Our objective was to assess integration of HIV with MCH services in public sector facilities in Swaziland.

### Design

In 2009, 2010 and 2012, client flow assessments were conducted over five days in the MCH units of eight government facilities, purposively selected as intervention or comparison sites.

### Participants

8263 MCH visits with female clients were tracked: 3261 in 2009; 2086 in 2010; and 2916 in 2012.

### Intervention

Activities and resources to strengthen integration of HIV services into post-natal care, 2009 - 2010.

### Main outcome measures

- (1) The proportion of all visits in which an HIV/STI testing, counselling or treatment was received together with an MCH service;
- (2) The proportion of all visits in which a client receives HIV counselling.

## Results

Across facilities, the proportion of visits in which both HIV/STI and MCH services were received varied considerably, e.g., from 9%-49% in 2009. HIV/STI services were integrated most frequently with child health, ante-natal care (ANC) and family planning – the most common reasons for women’s attendance – and least often with post-natal care (PNC) and cervical screening. There was no meaningful difference in integration over time by design group, and considerable heterogeneity across facilities. Receipt of integrated services increased in one intervention and two comparison facilities, where HIV counseling also rose, and fell in one intervention and two comparison facilities.

## Conclusions

Provision of HIV/STI services with MCH care occurred at all facilities, yet relatively few women receive integrated services. Increases in integration were driven by increases in HIV counseling while sharp declines in some facilities indicate integration is difficult to sustain. Opportunities for intensifying HIV integration lie with ANC, child health and family planning, while HIV-PNC integration will remain limited until more women attend PNC.

## Trial registry and number

Current Controlled Trials NCT01694862

## ARTICLE SUMMARY

### Article focus

- Maternal health care may provide an entry point for HIV services in high HIV-prevalence settings, yet little is known about actual integration of HIV with maternal care – or how integrated provision can be improved – in public sector facilities.
- Client flow assessments were conducted over five days in MCH units of eight facilities in Swaziland in 2009, 2010 and 2012 (N=8263 visits tracked) to determine the extent to which HIV/STI services were received with MCH services in the same visit, and in what combinations.
- We also assessed whether these outcomes improved with time in facilities which received an intervention designed to strengthen integration of HIV into post-natal care services (the Integra Initiative).

### Key messages

- Some provision of HIV/STI services with MCH care occurred at all facilities, indicating a capacity to integrate services in the public sector, yet relatively few women receive integrated services.
- In three facilities, increases in integration over time were driven by increases in HIV counselling. Sharp declines in other facilities suggest integration is difficult to sustain, given frequent staff rotation and vertical HIV treatment campaigns that can divert resources for integration.

- 1  
2  
3  
4  
5  
6  
7  
8  
9  
10  
11  
12  
13  
14  
15  
16  
17  
18  
19  
20  
21  
22  
23  
24  
25  
26  
27  
28  
29  
30  
31  
32  
33  
34  
35  
36  
37  
38  
39  
40  
41  
42  
43  
44  
45  
46  
47  
48  
49  
50  
51  
52  
53  
54  
55  
56  
57  
58  
59  
60
- There was no evidence of an increase in integration in three of four intervention facilities. Impact of the intervention to strengthen integration of HIV into PNC will remain limited until more women attend PNC; the best opportunities for scaling up HIV integration may lie with ANC, child health and family planning, given their frequent use.

### Strengths and limitations of this study

- The main strength is the scale and novelty of client flow data in public sector facilities in sub-Saharan Africa, offering detailed combinations of services received in every consultation. Such detail is typically unavailable from routine health information systems.
- An important limitation is the logistical challenge in conducting client flow assessments simultaneously across eight government facilities, affecting comparability of data across facilities and time points.

## INTRODUCTION

Maternal mortality and HIV have been described as “intersecting epidemics” which must be simultaneously tackled.<sup>1, 2</sup> In the setting for this study – Swaziland, where more than 40% of pregnant women are infected with HIV – HIV is intimately linked with maternal mortality and hindering efforts to lower maternal death rates.<sup>3, 4</sup>

Since the International Conference on Population and Development in 1994, a strong case has been made for integrating HIV into sexual and reproductive health (SRH) with potential benefits for both clients and facilities.<sup>5, 6</sup> Integration can simultaneously address clients’ reproductive health goals and their needs for HIV prevention and treatment and PMTCT.<sup>7</sup> Process evaluations of integrated HIV and family planning (FP) services indicate that facilities can gain by increasing the provision, uptake and efficiency of services while improving client satisfaction and reducing HIV-related stigma in clinics.<sup>8</sup>

More recently, the case for expanding integration of HIV/AIDS services to maternal, neonatal, child health and nutrition, including family planning, is supported in a systematic review which concludes that integration of such services is feasible to implement.<sup>9</sup> Furthermore, such integration can yield positive effects on the quality of services as well as client outcomes including contraceptive use, antiretroviral therapy in pregnancy, and HIV testing.<sup>9</sup>

Maternal and child health services can thus serve as entry points for HIV prevention, treatment and care, particularly in contexts of high HIV prevalence. Yet little is known about existing

1  
2  
3 levels of integration, particularly in public sector health facilities, or how provision can be  
4  
5 improved and scaled up.<sup>8</sup>  
6  
7

8  
9 The Integra Initiative was designed to evaluate different models of SRH-HIV integration,  
10  
11 including the integration of HIV/STI services with post-natal care (PNC) in Swaziland.<sup>10</sup> As part  
12  
13 of the Integra Initiative, this study analysed client flow data collected in eight public sector  
14  
15 facilities in Swaziland in 2009, 2010 and 2012, to determine whether clients seeking maternal  
16  
17 and child health services (MCH) receive integrated services, and if so, in what combinations of  
18  
19 HIV/STI and MCH services. We also sought to understand how the receipt of integrated  
20  
21 services differs over time and between facilities which did and did not receive the Integra  
22  
23 intervention. We hoped the answers would help identify gaps and opportunities for integrating  
24  
25 HIV within maternal health services and achieving universal access to both.  
26  
27  
28  
29  
30  
31  
32

## 33 **METHODS**

### 34 **Data Collection**

35  
36  
37 As part of Integra's non-randomised design, eight public sector facilities were selected from  
38  
39 three of Swaziland's four regions. Four facilities were purposively designated as Intervention  
40  
41 facilities (referred to as Facilities A-D), based on their previous participation in an operations  
42  
43 research study by Population Council, one of the Integra institutional partners.<sup>11</sup> Four  
44  
45 comparison facilities were selected based on their distance from intervention sites (to avoid  
46  
47 contamination) and no current provision of integrated HIV-PNC services (Facilities E-H).  
48  
49  
50  
51  
52  
53  
54  
55  
56  
57  
58  
59  
60



1  
2  
3 In the intervention facilities, between October 2009 and December 2010, Integra delivered a  
4  
5 programme designed to strengthen and maintain the provision of integrated HIV and PNC  
6  
7 services. The intervention components included: (a) a training package to facilitate mentoring  
8  
9 of front-line health providers by more experienced providers; (b) job aids to promote  
10  
11 integration, including the Balanced Counselling Strategy Plus (BCS+) toolkit containing an  
12  
13 algorithm, counselling cards and brochures to support counselling, including HIV service  
14  
15 provision, within PNC consultations,<sup>11, 12</sup> and (c) ongoing support to discuss role clarification,  
16  
17 organisational change, referral/linkages and management of service statistics.  
18  
19  
20  
21

22  
23  
24  
25 The client flow assessments (CFAs) comprise one data component of the Integra evaluation,  
26  
27 and were designed to capture service utilisation patterns among clients seeking MCH services,  
28  
29 given that data on integrated service provision were not available from routine clinical data  
30  
31 (which collect data on different services in separate registers). Specifically, CFAs were  
32  
33 conducted in all study facilities in November 2009, December 2010, and August 2012. Over a  
34  
35 period of five days, Monday through Friday, all clients entering the facility for MCH health  
36  
37 services were given a client flow form by teams of trained local researchers or service  
38  
39 providers. Clients carried the form throughout their visit, and each service provider they saw  
40  
41 completed the form in their consultation room/cubicle, indicating session start/end times, the  
42  
43 service(s) received by the client and any referrals to other providers. The first CFA (late  
44  
45 November 2009) was conducted soon after the intervention began in October 2009, but before  
46  
47 it was fully implemented in any site.  
48  
49  
50  
51  
52  
53  
54  
55  
56  
57  
58  
59  
60

## Data analysis

We defined our unit of analysis to be a visit, which comprised all providers seen and services received in the same day for each client, as captured on the client assessment form. Clients were either a single adult or an adult plus a child. We excluded visits of males aged 12 years or over, to focus on maternal and child health services. The age of 12 was selected as reproductive health services were received by females as young as 12.

The following primary and secondary outcomes were calculated for each facility and time point:

1. Receipt of integrated HIV-MCH services: the proportion of all visits in which a client receives any HIV or STI service, specifically: HIV testing, counselling or treatment; PMTCT; or STI counselling or testing

*and*

any of the following MCH services: FP counselling or provision; PNC for mother or baby; cervical cancer screening; child health (including weighing and immunisations); and antenatal care (ANC).

We hypothesised that HIV-MCH integration would increase in facilities which received the Integra intervention.

2. Receipt of HIV counselling: the proportion of all visits in which a client receives HIV counselling.

We hypothesised that HIV counselling would increase as a result of the Integra intervention, regardless of women's need for HIV testing or treatment which are not

1  
2  
3 constant (medical histories, including the need for testing or treatment, were not  
4  
5 captured on the CFA form).  
6  
7

8  
9 We also sought to describe which MCH services were most commonly combined with HIV/STI  
10 services, by calculating the percentage of visits in which an HIV/STI service was combined with  
11 each type of MCH service. We examined the change over time in the proportion of visits  
12 receiving integrated HIV/STI and MCH services (primary outcome) and HIV counselling  
13 (secondary outcome) separately for each facility. We used the 95% confidence interval around  
14 the difference (in the 2010 and 2012 proportions compared to 2009) as an indication of  
15 whether the observed change was due to chance (if it included the null value of zero).  
16  
17  
18  
19  
20  
21  
22  
23  
24

25  
26 To examine differences in the key outcomes by design group, we calculated the risk difference  
27 in 2010 and 2012 (each compared to 2009) for intervention versus comparison facilities for  
28 both the primary and secondary outcomes using a two-stage approach. In the first stage we  
29 estimated facility-level residuals by fitting a logistic regression model and including terms to  
30 adjust for baseline value (corresponding proportion of visits in 2009), average annual client  
31 load (<10000, 10000+), and rural/urban status. Difference residuals were then obtained as the  
32 difference between the observed and predicted values (divided by facility size). In the second  
33 stage we analysed the facility-level residuals, based on the assumption that in the absence of  
34 any intervention effect the residuals should be distributed normally with no systematic  
35 difference between the intervention and comparison arms. Difference residuals were analysed  
36 using linear regression including an interaction term representing the difference in 'change  
37 from baseline' between the design groups.  
38  
39  
40  
41  
42  
43  
44  
45  
46  
47  
48  
49  
50  
51  
52  
53  
54  
55  
56  
57  
58  
59  
60

### **Ethics Statement**

Ethics approval for the client flow assessments was obtained from the Swaziland Scientific Review Board, the London School of Hygiene & Tropical Medicine and the Population Council Institutional Review Board.

### **RESULTS**

Across eight facilities, 3261 visits were tracked in November 2009, 2086 visits in December 2010, and 2916 in August 2012. Table 1 presents general characteristics of the visits and facilities. Overall, about half of the visits included an adult female and child (under 12 years), versus an adult client only, although this proportion varied across facilities (range: 28%-95%). In almost all facilities, clients received on average more than one service during their visit, with many receiving two or more. Each year, approximately eight percent of clients did not receive any service or referral during their visit, with the highest proportions in the facilities with highest client load (e.g., 18% of clients in Facility B and 31% in Facility D in 2010). In all facilities, and in both years, child health services were either the first or second most common service received. Family planning counselling or provision, and ante-natal care, were among the top three services for most facilities. Across facilities, the least common services received were post-natal care and cervical screening (See Supplementary Table 1).

Table 1. Characteristics of the facilities, visits and services tracked in 2009, 2010 and 2012

| Intervention                                                     | Facility A  |             |             | Facility B  |             |             | Facility C  |             |             | Facility D  |             |             |
|------------------------------------------------------------------|-------------|-------------|-------------|-------------|-------------|-------------|-------------|-------------|-------------|-------------|-------------|-------------|
|                                                                  | 2009        | 2010        | 2012        | 2009        | 2010        | 2012        | 2009        | 2010        | 2012        | 2009        | 2010        | 2012        |
| <b>Visits tracked</b>                                            | 590         | 475         | 532         | 855         | 263         | 408         | 211         | 184         | 241         | 753         | 411         | 607         |
| <b>Client category</b>                                           |             |             |             |             |             |             |             |             |             |             |             |             |
| Adult (12+ years) only                                           | 395 (66.9%) | 196 (41.3%) | 211 (39.7%) | 443 (51.8%) | 153 (58.2%) | 172 (42.2%) | 144 (68.2%) | 87 (47.3%)  | 82 (34%)    | 310 (41.2%) | 197 (47.9%) | 408 (67.2%) |
| Adult + child                                                    | 176 (29.8%) | 278 (58.5%) | 320 (60.2%) | 153 (17.9%) | 109 (41.4%) | 236 (57.8%) | 64 (30.3%)  | 97 (52.7%)  | 156 (64.7%) | 93 (12.4%)  | 213 (51.8%) | 198 (32.6%) |
| <b>Adult age</b>                                                 |             |             |             |             |             |             |             |             |             |             |             |             |
| Mean [sd]                                                        | 26.2 [6.4]  | 26.2 [7.2]  | 26.3 [6.5]  | 26.8 [8.2]  | 27 [7.2]    | 26.6 [7.3]  | 28.5 [8.4]  | 26.8 [8]    | 27.7 [8.5]  | 27.6 [7.4]  | 27.3 [8.4]  | 31.3 [10.2] |
| Missing                                                          | 9 (1.5%)    | 258 (54.3%) | 17 (3.2%)   | 357 (41.8%) | 40 (15.2%)  | 13 (3.2%)   | 2 (.9%)     | 2 (1.1%)    | 1 (.4%)     | 382 (50.7%) | 165 (40.1%) | 12 (2%)     |
| <b>Services received per visit</b>                               |             |             |             |             |             |             |             |             |             |             |             |             |
| None                                                             | 37 (6.3%)   | 24 (5.1%)   | 88 (16.5%)  | 134 (15.7%) | 47 (17.9%)  | 23 (5.6%)   | 11 (5.2%)   | 6 (3.3%)    | 32 (13.3%)  | 93 (12.4%)  | 129 (31.4%) | 29 (4.8%)   |
| One                                                              | 319 (54.1%) | 106 (22.3%) | 192 (36.1%) | 479 (56%)   | 145 (55.1%) | 208 (51%)   | 47 (22.3%)  | 57 (31%)    | 114 (47.3%) | 246 (32.7%) | 135 (32.8%) | 238 (39.2%) |
| Two or more                                                      | 234 (39.7%) | 345 (72.6%) | 252 (47.4%) | 242 (28.3%) | 71 (27%)    | 177 (43.4%) | 153 (72.5%) | 121 (65.8%) | 95 (39.4%)  | 414 (55%)   | 147 (35.8%) | 340 (56%)   |
| <b>Visits where ≥1 service received</b>                          |             |             |             |             |             |             |             |             |             |             |             |             |
| Mean [sd] services received                                      | 1.8 [1.3]   | 2.5 [1.4]   | 2.6 [2]     | 1.6 [1.1]   | 1.4 [0.8]   | 2 [1.6]     | 2.6 [1.7]   | 2 [1]       | 1.9 [1.3]   | 2.1 [1.2]   | 2 [1.3]     | 2 [1.3]     |
| Mean [sd] providers seen                                         | 1.3 [0.5]   | 1.5 [0.5]   | 1.6 [0.9]   | 1.2 [0.4]   | 1 [0.2]     | 1.4 [0.7]   | 1.3 [0.5]   | 1.1 [0.4]   | 1.3 [0.5]   | 1.5 [0.7]   | 1.5 [0.7]   | 1.1 [0.3]   |
| <b>Visits where no services were either referred or received</b> | 36 (6.1%)   | 22 (4.6%)   | 88 (16.5%)  | 112 (13.1%) | 47 (17.9%)  | 15 (3.7%)   | 7 (3.3%)    | 6 (3.3%)    | 16 (6.6%)   | 81 (10.8%)  | 69 (16.8%)  | 29 (4.8%)   |
| <b>Average annual client load*</b>                               | 32,321      |             |             | 65,794      |             |             | 9,974       |             |             | 40,485      |             |             |
| <b>Setting (urban/rural)</b>                                     | Urban       |             |             | Urban       |             |             | Peri-urban  |             |             | Urban       |             |             |
| Comparison                                                       | Facility E  |             |             | Facility F  |             |             | Facility G  |             |             | Facility H  |             |             |
|                                                                  | 2009        | 2010        | 2012        | 2009        | 2010        | 2012        | 2009        | 2010        | 2012        | 2009        | 2010        | 2012        |
| <b>Visits tracked</b>                                            | 220         | 215         | 380         | 317         | 333         | 347         | 146         | 170         | 114         | 169         | 35          | 287         |
| <b>Client category</b>                                           |             |             |             |             |             |             |             |             |             |             |             |             |
| Adult (12+ years) only                                           | 131 (59.5%) | 72 (33.5%)  | 234 (61.6%) | 194 (61.2%) | 183 (55%)   | 154 (44.4%) | 74 (50.7%)  | 106 (62.4%) | 47 (41.2%)  | 110 (65.1%) | 2 (5.7%)    | 178 (62%)   |
| Adult + child                                                    | 78 (35.5%)  | 143 (66.5%) | 145 (38.2%) | 117 (36.9%) | 150 (45%)   | 193 (55.6%) | 69 (47.3%)  | 64 (37.6%)  | 67 (58.8%)  | 48 (28.4%)  | 33 (94.3%)  | 107 (37.3%) |
| <b>Adult age</b>                                                 |             |             |             |             |             |             |             |             |             |             |             |             |
| Mean [sd]                                                        | 26 [7.5]    | 26 [5.9]    | 34.5 [12.6] | 26.1 [6.2]  | 26.4 [6.3]  | 26.5 [7.4]  | 27.4 [7.8]  | 31.4 [10.8] | 26.5 [7.2]  | 25.1 [6]    | 29.5 [10.6] | 30.9 [11.9] |
| Missing                                                          | 1 (.5%)     | 95 (44.2%)  | 53 (13.9%)  | 5 (1.6%)    | 124 (37.2%) | 9 (2.6%)    | 0 (0%)      | 6 (3.5%)    | 5 (4.4%)    | 0 (0%)      | 33 (94.3%)  | 67 (23.3%)  |
| <b>Services received per visit</b>                               |             |             |             |             |             |             |             |             |             |             |             |             |
| None                                                             | 10 (4.5%)   | 3 (1.4%)    | 13 (3.4%)   | 1 (.3%)     | 5 (1.5%)    | 8 (2.3%)    | 11 (7.5%)   | 6 (3.5%)    | 14 (12.3%)  | 31 (18.3%)  | 0 (0%)      | 29 (10.1%)  |
| One                                                              | 99 (45%)    | 34 (15.8%)  | 45 (11.8%)  | 100 (31.5%) | 177 (53.2%) | 46 (13.3%)  | 19 (13%)    | 84 (49.4%)  | 32 (28.1%)  | 32 (18.9%)  | 8 (22.9%)   | 155 (54%)   |
| Two or more                                                      | 111 (50.5%) | 178 (82.8%) | 322 (84.7%) | 216 (68.1%) | 151 (45.3%) | 293 (84.4%) | 116 (79.5%) | 80 (47.1%)  | 68 (59.6%)  | 106 (62.7%) | 27 (77.1%)  | 103 (35.9%) |
| <b>Visits where ≥1 service received</b>                          |             |             |             |             |             |             |             |             |             |             |             |             |
| Mean [sd] services received                                      | 1.8 [1.1]   | 2.4 [1.1]   | 3.2 [1.6]   | 2.3 [1.6]   | 1.6 [0.9]   | 3.4 [1.6]   | 3.2 [1.6]   | 1.6 [0.6]   | 2.6 [1.6]   | 2.7 [1.6]   | 2.8 [1.3]   | 1.8 [1.5]   |
| Mean [sd] providers seen                                         | 1.3 [0.5]   | 1.1 [0.2]   | 1.7 [0.7]   | 1.8 [0.8]   | 1 [0.2]     | 1.3 [0.6]   | 1.5 [0.5]   | 1.4 [0.6]   | 1.3 [0.6]   | 1.4 [0.6]   | 1.1 [0.3]   | 1.2 [0.5]   |
| <b>Visits where no services were either referred or received</b> | 9 (4.1%)    | 2 (.9%)     | 12 (3.2%)   | 1 (.3%)     | 5 (1.5%)    | 7 (2%)      | 11 (7.5%)   | 5 (2.9%)    | 8 (7%)      | 3 (1.8%)    | 0 (0%)      | 21 (7.3%)   |
| <b>Average annual client load*</b>                               | 7,736       |             |             | 28,202      |             |             | 9,674       |             |             | 6,959       |             |             |
| <b>Setting (urban/rural)</b>                                     | Rural       |             |             | Peri-urban  |             |             | Rural       |             |             | Rural       |             |             |

\*Annual client load taken from health facility assessments conducted for the Integra Initiative in 2010. All tables are N (%) unless indicated otherwise.

### Receipt of integrated HIV-MCH services

There was evidence of HIV-MCH integration at all facilities and time points, although the extent of integration (the proportion of visits in which integrated HIV-MCH services were received) varied by facility: specifically, between 9% and 49% in 2009, 2%-22% in 2010 and 10-44% in 2012 (see Table 2). In the short-term, five facilities experienced declines in integration between 2009 and 2010: by seven and 13 percentage points in two intervention facilities; and by 12, 19 and 48 percentage points in three comparison facilities. In the longer-term, integration increased in one intervention site (Facility A, from 9% in 2009 to 17% of visits in 2012) and two comparison facilities (Facility E, from 11% to 37%; and Facility F, from 16% to 44% in 2012, after experiencing an initial drop to 9% in 2010). Meanwhile, integration fell in one intervention site (Facility C, from 33% to 16%) and two comparison facilities (Facility G, from 49% to 27%; Facility H, from 25% to 14%). Two intervention facilities (B and D) experienced no significant change in HIV-MCH integration between 2009 and 2012.

Table 2. Proportion of visits receiving the primary and secondary outcomes, by facility, year and design group

|                                                                                   | Intervention    |                      |                 |                      |                |                       |                |                      |                             |                       |
|-----------------------------------------------------------------------------------|-----------------|----------------------|-----------------|----------------------|----------------|-----------------------|----------------|----------------------|-----------------------------|-----------------------|
|                                                                                   | Facility A      |                      | Facility B      |                      | Facility C     |                       | Facility D     |                      | All intervention facilities |                       |
|                                                                                   | Outcome         | Change from baseline | Outcome         | Change from baseline | Outcome        | Change from baseline  | Outcome        | Change from baseline | Outcome†                    | Change from baseline‡ |
| <b>Outcome 1: Any HIV/STI service plus any MCH service received in same visit</b> |                 |                      |                 |                      |                |                       |                |                      |                             |                       |
| 2009                                                                              | 54/590 (9.2%)   |                      | 83/855 (9.7%)   |                      | 69/211 (32.7%) |                       | 98/753 (13%)   |                      | 16.1%                       |                       |
| 2010                                                                              | 74/475 (15.6%)  | 6.4% (2.4, 10.4)     | 6/263 (2.3%)    | -7.4% (-10.1, -4.7)  | 38/184 (20.7%) | -12% (-20.7, -3.4)    | 73/411 (17.8%) | 4.7% (.3, 9.2)       | 14.1%                       | -0.8% (-19.3, 17.7)   |
| 2012                                                                              | 91/532 (17.1%)  | 8% (4, 11.9)         | 40/408 (9.8%)   | .1% (-3.4, 3.6)      | 38/241 (15.8%) | -16.9% (-24.8, -9.1)  | 78/607 (12.9%) | -2% (-3.8, 3.4)      | 13.9%                       | -8.1% (-27.0, 10.8)   |
| <b>Outcome 2: HIV counselling received</b>                                        |                 |                      |                 |                      |                |                       |                |                      |                             |                       |
| 2009                                                                              | 38/590 (6.4%)   |                      | 38/855 (4.4%)   |                      | 56/211 (26.5%) |                       | 24/753 (3.2%)  |                      | 10.2%                       |                       |
| 2010                                                                              | 72/475 (15.2%)  | 8.7% (4.9, 12.5)     | 20/263 (7.6%)   | 3.2% (-3, 6.6)       | 30/184 (16.3%) | -10.2% (-18.2, -2.2)  | 54/411 (13.1%) | 10% (6.5, 13.5)      | 13.1%                       | 0.1% (-13.0, 13.2)    |
| 2012                                                                              | 81/532 (15.2%)  | 8.8% (5.1, 12.4)     | 13/408 (3.2%)   | -1.3% (-3.5, .9)     | 21/241 (8.7%)  | -17.8% (-24.8, -10.9) | 53/607 (8.7%)  | 5.5% (3, 8.1)        | 9.0%                        | -11% (-32.6, 10.6)    |
|                                                                                   | Comparison      |                      |                 |                      |                |                       |                |                      |                             |                       |
|                                                                                   | Facility E      |                      | Facility F      |                      | Facility G     |                       | Facility H     |                      | All comparison facilities   |                       |
|                                                                                   | Outcome         | Change from baseline | Outcome         | Change from baseline | Outcome        | Change from baseline  | Outcome        | Change from baseline | Outcome†                    | Change from baseline‡ |
| <b>Outcome 1: Any HIV/STI service plus any MCH service received in same visit</b> |                 |                      |                 |                      |                |                       |                |                      |                             |                       |
| 2009                                                                              | 24/220 (10.9%)  |                      | 52/317 (16.4%)  |                      | 72/146 (49.3%) |                       | 42/169 (24.9%) |                      | 25.4%                       |                       |
| 2010                                                                              | 57/215 (26.5%)  | 15.6% (8.4, 22.8)    | 30/333 (9%)     | -7.4% (-12.5, -2.3)  | 6/170 (3.5%)   | -45.8% (-54.4, -37.2) | 5/35 (14.3%)   | -10.6% (-23.9, 2.7)  | 13.3%                       | -10.8% (-29.2, 7.7)   |
| 2012                                                                              | 141/380 (37.1%) | 26.2% (19.8, 32.6)   | 154/347 (44.4%) | 28% (21.3, 34.6)     | 31/114 (27.2%) | -22.1% (-33.6, -10.6) | 39/287 (13.6%) | -11.3% (-18.9, -3.6) | 30.6%                       | 0.6% (-19.5, 18.2)    |
| <b>Outcome 2: HIV counselling received</b>                                        |                 |                      |                 |                      |                |                       |                |                      |                             |                       |
| 2009                                                                              | 10/220 (4.5%)   |                      | 27/317 (8.5%)   |                      | 44/146 (30.1%) |                       | 24/169 (14.2%) |                      | 14.4%                       |                       |
| 2010                                                                              | 29/215 (13.5%)  | 8.9% (3.6, 14.3)     | 13/333 (3.9%)   | -4.6% (-8.3, -9)     | 4/170 (2.4%)   | -27.8% (-35.6, -20)   | 3/35 (8.6%)    | -5.6% (-16.3, 5)     | 7.1%                        | -10.1% (-23.1, 3.0)   |
| 2012                                                                              | 114/380 (30%)   | 25.5% (20.1, 30.8)   | 202/347 (58.2%) | 49.7% (43.7, 55.7)   | 18/114 (15.8%) | -14.3% (-24.4, -4.3)  | 18/287 (6.3%)  | -7.9% (-13.9, -2)    | 27.6%                       | 3.4% (-18.2, 25.0)    |

†Unadjusted cluster-level proportions analysed separately at each time point. ‡Change from baseline adjusted for facility size and rural/urban status. All confidence intervals are at 95% confidence level.

### **Combinations of HIV/STI and MCH services received**

In 2009, at least one client in every facility received each type of HIV-MCH integration investigated; that is, one or more clients received integration of HIV-FP (provision and counselling), HIV-ANC, HIV-PNC (for mother or baby), HIV-cervical screening (HIV-CS), and HIV-child health (HIV-CH). Figure 1 shows the proportion of visits in which each service combination was received at each facility. The most common integration in 2009 was HIV with child health services (up to 33% of all visits in Facility G), followed by HIV-ANC and HIV-FP (counselling or provision). Less frequent was integration of HIV services with PNC (a maximum of 6% of visits in Facility C) or cervical screening (maximum 6% of visits in Facility D).

In 2010, integration of HIV services with the MCH services no longer occurred in every facility. For example, in three facilities there were zero visits in which integration of HIV services and family planning occurred. And integration of HIV services and cervical screening services disappeared in one intervention and all comparison facilities, while HIV-ANC and HIV-PNC integration disappeared in two comparison sites. Excluding the latter two sites, integration of HIV-ANC was the most common type of integration in 2010. Between 2009 and 2012, HIV integration with FP counselling rose in facilities A, E and F - the same facilities that experienced increases in overall HIV-MCH integration. HIV-FP counselling integration declined in the other facilities, and integration of HIV and PNC services – the focus of the intervention – remained low in all facilities over time.

### **Receipt of HIV counselling**

As a secondary outcome, we hypothesised that HIV counselling would increase in the intervention facilities. Table 2 shows that the proportion of visits in which a client received HIV



1  
2  
3 counselling increased between 2009 and 2012 in two intervention (A,D) and two comparison  
4 facilities (E,F), and declined in two intervention sites (Facility C) and two comparison sites (G,H).  
5  
6 The absolute numbers of visits that included HIV counselling are presented in Figure 2, which  
7  
8 also shows that HIV counselling was more often provided in combination with an MCH service  
9  
10 than alone. Specifically, HIV counselling was most often provided together with ANC, FP  
11  
12 counselling or child health services (data not shown).  
13  
14  
15  
16  
17  
18  
19

### 20 **Evidence of an intervention effect**

21  
22 As shown in Table 2 (final column), there was no statistical evidence that integration increased  
23  
24 over time in intervention facilities as a group. On average, the intervention facilities provided  
25  
26 integrated services in 16 percent of visits in 2009 and 14 percent in both 2010 and 2012. Nor  
27  
28 was there statistical evidence that the proportion of visits providing HIV counselling increased  
29  
30 in the intervention group (averaging 10% in 2009 and 9% in 2012). In the comparison group,  
31  
32 both overall HIV-MCH integration and HIV counselling increased between 2009 and 2012 (by 5  
33  
34 and 13 percentage points) after experiencing a decline in 2010. For these differences, 95%  
35  
36 confidence intervals include the null value of zero. Between the intervention and comparison  
37  
38 groups, there was no statistical difference in change from baseline levels of HIV-MCH  
39  
40 integration or provision of HIV counselling (data not shown).  
41  
42  
43  
44  
45  
46  
47  
48  
49  
50

### 51 **DISCUSSION**

52  
53 With what we believe are among the most detailed data on HIV-MCH integration in the public  
54  
55 sector in Africa, we have been able to assess the extent to which clients are receiving  
56  
57 integrated services, and in which combinations over time. The client flow assessments have  
58  
59  
60

1  
2  
3 shown that HIV/STI services (counselling, testing and treatment) are being integrated with a  
4  
5 wide range of MCH services, including family planning, ante-natal care, post-natal care,  
6  
7 cervical screening and child health services. This is evidence of the capacity to integrate, in  
8  
9 large urban facilities as well as small, rural facilities across Swaziland. It also fills a current gap  
10  
11 in evidence – regarding the feasibility of integrating HIV services with infant/child health  
12  
13 services, and postnatal/postpartum services. A recent systematic review of integration  
14  
15 evaluations identified both models as ‘inadequately studied’ to date.<sup>9</sup>  
16  
17  
18  
19  
20  
21  
22

23 Nevertheless, integration occurred in a minority of visits and varied considerably across  
24  
25 facilities. Furthermore, the level of integration fell in three of the eight facilities between 2009  
26  
27 and 2012. The facility with the highest level of integration in 2009 dropped to the lowest a  
28  
29 year later (from 49% to <2%). This may be explained by the existence of an NGO campaign to  
30  
31 increase access to ART in the area of that facility during the 2010 assessment, as HIV  
32  
33 treatment appears to have displaced almost all other HIV and MCH services. This suggests  
34  
35 that integration can be susceptible to vertical programmes or competing priorities,  
36  
37 particularly in smaller facilities where the 2010 declines in integration were steepest.  
38  
39  
40  
41  
42  
43  
44

45 It is also possible that integration declined in settings where clients did not need HIV services  
46  
47 with every visit. The CFA did not capture clients’ history or need for such services, and thus we  
48  
49 cannot interpret observed changes in their provision. For this reason we were particularly  
50  
51 interested in the provision of HIV counselling, which can be promoted regardless of need for  
52  
53 testing or treatment. HIV counselling rose in two intervention and two comparison facilities. In  
54  
55 the three sites where HIV-MCH integration rose, this appeared to be driven by an increase in  
56  
57  
58  
59  
60

1  
2  
3 HIV counselling. That HIV counselling was most often provided with an MCH service rather  
4  
5 than alone suggests it has an important role to play in scaling up integration, but requires a  
6  
7 concerted effort to sustain its provision.  
8  
9

10  
11  
12  
13 The most common form of integration observed was between HIV services and child health,  
14  
15 followed by ANC and FP. These services may offer the best opportunities for integration with  
16  
17 HIV, given most women attended for child health, ANC and FP services. This is particularly  
18  
19 encouraging in light of a recent review concluding that uptake of PMTCT in sub-Saharan  
20  
21 Africa is inadequate, but improves with an integrated family-centred approach, for example, if  
22  
23 HIV treatment is provided at antenatal clinics.<sup>7</sup>  
24  
25  
26  
27  
28  
29  
30

31 Less common was integration of HIV/STI with PNC or cervical screening, most likely due to the  
32  
33 lower number of clients receiving PNC and cervical screening relative to other services (or  
34  
35 PNC clients may have received HIV/STI testing in recent ANC visits). This suggests that  
36  
37 effectiveness of the Integra Initiative – which focuses on HIV-PNC integration in Swaziland –  
38  
39 may be limited until more clients attend for PNC services. And this may require further  
40  
41 investment in equipment and training for PNC (as well as cervical screening, as only one  
42  
43 facility had the capacity to offer immediate cryotherapy) as well as demand creation to  
44  
45 increase service uptake.  
46  
47  
48  
49  
50

51  
52 The formal comparison of integration by study design (intervention versus comparison sites)  
53  
54 showed no statistical difference in HIV-MCH integration over time. Neither was there a  
55  
56 meaningful difference in the receipt of HIV counselling in the intervention group over time.  
57  
58  
59  
60

### **Limitations and the challenges of embedding research in 'real-world' settings**

The observed changes in levels of integration, and absence of an intervention effect, could be due to a number of factors which we were unable to account for given the non-randomised design, as well as challenges implementing the protocol as intended.

With regard to design: in a small country with limited number of facilities, intervention sites could not be matched with similar-sized comparison facilities without risk of contamination. This resulted in systematically different groups, with intervention facilities primarily large and urban, and comparison facilities mostly small and rural. Given the resulting heterogeneity, we felt it was more informative to compare changes by facility than study design. The wide variation we observed across facilities likely reflects the different capacities and infrastructure available to provide integrated services, i.e., facilities can not follow the same 'blue print' for integration.

Some observed changes may also be due to 'seasonal' differences in 2009 and 2010. For logistical reasons, the client flow assessments were delayed in 2010 and could not be conducted in the same week in November as in 2009. And specific circumstances in some facilities meant the assessments could not be simultaneous in all sites, as the protocol had intended. Most assessments were delayed until the week before Christmas which may account for the smaller number of clients in most facilities in 2010. This timing may have affected the range of services provided and may account for different patterns of integration. Smaller, rural

1  
2  
3 facilities – where the drops in integration were the steepest - may be impacted more than  
4  
5 large, rural sites during such holiday periods.  
6  
7  
8  
9

10  
11 It is also possible that provision of HIV and MCH services may fluctuate frequently or  
12  
13 periodically, in patterns we could not detect from 5-day 'snapshot' assessments (regardless of  
14  
15 their specific timing). It may be more informative to monitor over a longer period, for more  
16  
17 representative data. Yet, the 5-day assessments proved challenging and resource-intensive to  
18  
19 implement, and longer versions may be prohibitive in many settings. Strengthening routine  
20  
21 data collection systems may be preferable, but many existing systems record services  
22  
23 individually in separate registers, and are thus unable to document service integration without  
24  
25 fundamentally changing the system. It was this barrier that led us to develop the client flow  
26  
27 assessment.  
28  
29  
30  
31  
32  
33  
34  
35

### 36 **Conclusions**

37  
38 The client flow assessment provided rich detail about the range and combinations of services  
39  
40 received by large number of clients. This was valuable for understanding whether and how HIV  
41  
42 and MCH services are integrated in practice. The data confirm that, in a context of high HIV  
43  
44 prevalence, capacity exists in public sector services for integration of HIV services into MCH  
45  
46 care. In particular, ANC, child health and family planning provide promising entry-points for  
47  
48 reaching the largest number of women. Sustaining HIV-MCH integration may require  
49  
50 concerted effort over time. The study limitations reflect the challenges of embedding rigorous  
51  
52 research into existing and diverse facilities (i.e., 'real-world' evaluations), and difficulties in  
53  
54 recording the provision of integrated services.  
55  
56  
57  
58  
59  
60

## Acknowledgements

The authors are grateful to the clients and the Integra fieldwork team for collecting and managing the data used in this analysis. We also acknowledge the support of the Ministry of Health and facility managers and providers for supporting and facilitating the client flow assessments.

## Author contributions

SM, JK, CW, KC, RN helped to design the data collection. JK managed the data collection. JF and WZ cleaned and managed the datasets. IB and JF led the analysis. All authors provided input into the data interpretation. IB drafted the manuscript. All authors read and commented on a complete draft.

## Data sharing

The dataset will be made available via an LSHTM repository upon completion of the Integra Initiative.

## Competing interests statement

The authors have declared that no competing interests exist.

## Funding statement

This work was supported by the Bill and Melinda Gates Foundation. No funding bodies had any role in study design, data collection and analysis, decision to publish, or preparation of the manuscript.

**REFERENCE LIST**

1. McIntyre J. Mothers infected with HIV. *Br Med Bull*. 2003;67:127-35. PubMed PMID: 14711759.
2. PLoS Medicine Editors, . HIV in maternal and child health: concurrent crises demand cooperation. *PLoS Med*. 2010 Jul;7(7):e1000311. PubMed PMID: 20668656.
3. Abdool-Karim Q, Abouzahr C, Dehne K, Mangiaterra V, Moodley J, Rollins N, et al. HIV and maternal mortality: turning the tide. *Lancet*. 2010 Jun 5;375(9730):1948-9. PubMed PMID: 20569827.
4. Kingdom of Swaziland. Swaziland Country Report on Monitoring the Political Declaration on HIV and AIDS. Kingdom of Swaziland: 2012.
5. United Nations. Programme of Action of the United Nations International Conference on Population and Development Cairo: 1995.
6. WHO, UNAIDS, IPPF, UNFPA Linking Sexual and Reproductive Health and HIV/AIDS. Geneva: 2005.
7. Wettstein C, Mugglin C, Egger M, Blaser N, Salazar L, Estill J, et al. Missed Opportunities to Prevent Mother-to-Child-Transmission in sub-Saharan Africa: Systematic Review and Meta-Analysis. *Aids*. 2012 Aug 31. PubMed PMID: 22948267.
8. Church K, Mayhew SH. Integration of STI and HIV prevention, care, and treatment into family planning services: a review of the literature. *Stud Fam Plann*. 2009 Sep;40(3):171-86. PubMed PMID: 19852408.
9. Lindegren ML, Kennedy CE, Bain-Brickley D, Azman H, Creanga AA, Butler LM, et al. Integration of HIV/AIDS services with maternal, neonatal and child health, nutrition, and family planning services. *Cochrane Database Syst Rev*. 2012;9:CD010119. PubMed PMID: 22972150.

- 1  
2  
3 10. Warren CE, Mayhew SH, Vassall A, Kimani JK, Church K, Obure CD, et al. Study protocol  
4  
5 for the Integra Initiative to assess the benefits and costs of integrating sexual and  
6  
7 reproductive health and HIV services in Kenya and Swaziland. BMC Public Health.  
8  
9 2012;12:973.  
10
- 11  
12 11. Warren C, Shongwe R, Waligo A, Mahdi M, Mazia G, Narayanan I. Repositioning  
13  
14 Postnatal Care in a High HIV Environment: Swaziland. Horizons Final Report, 2008.  
15  
16
- 17 12. Population Council. The Balanced Counseling Strategy Plus: A toolkit for family planning  
18  
19 service providers working in High HIV/STI prevalence settings  
20  
21 [http://www.popcouncil.org/publications/books/2012\\_BalancedCounselingStrategyPLUS.a](http://www.popcouncil.org/publications/books/2012_BalancedCounselingStrategyPLUS.a)  
22  
23 [sp2012.](http://www.popcouncil.org/publications/books/2012_BalancedCounselingStrategyPLUS.a)  
24  
25  
26  
27  
28  
29  
30  
31  
32  
33  
34  
35  
36  
37  
38  
39  
40  
41  
42  
43  
44  
45  
46  
47  
48  
49  
50  
51  
52  
53  
54  
55  
56  
57  
58  
59  
60



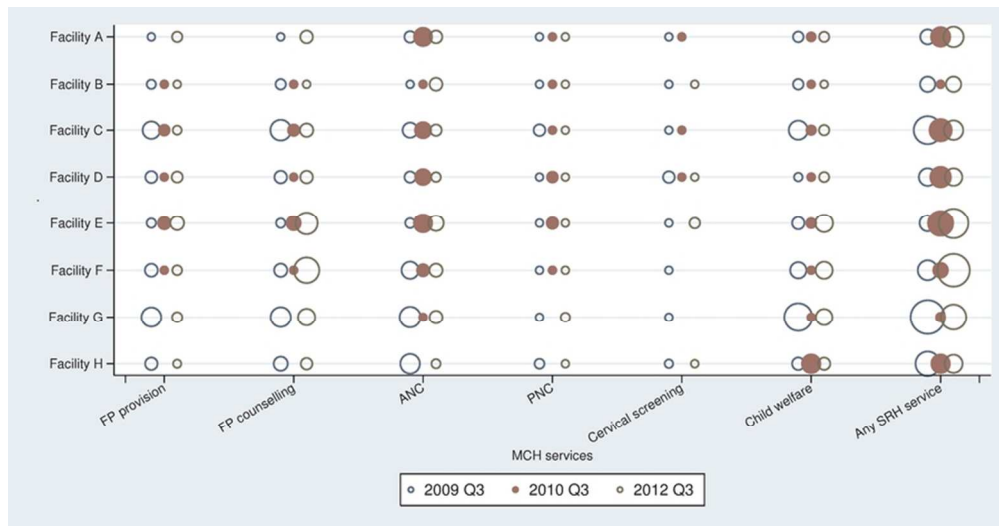

Figure 1. Proportion of visits receiving any HIV/STI service combined with MCH services, by facility and MCH service.

Note: The size of the bubble is proportional to the percentage of visits. The smallest bubbles represent <2.5%; the largest bubble represents 49%.

76x39mm (300 x 300 DPI)

Review only

1  
2  
3  
4  
5  
6  
7  
8  
9  
10  
11  
12  
13  
14  
15  
16  
17  
18  
19  
20  
21  
22  
23  
24  
25  
26  
27  
28  
29  
30  
31  
32  
33  
34  
35  
36  
37  
38  
39  
40  
41  
42  
43  
44  
45  
46  
47  
48  
49  
50  
51  
52  
53  
54  
55  
56  
57  
58  
59  
60

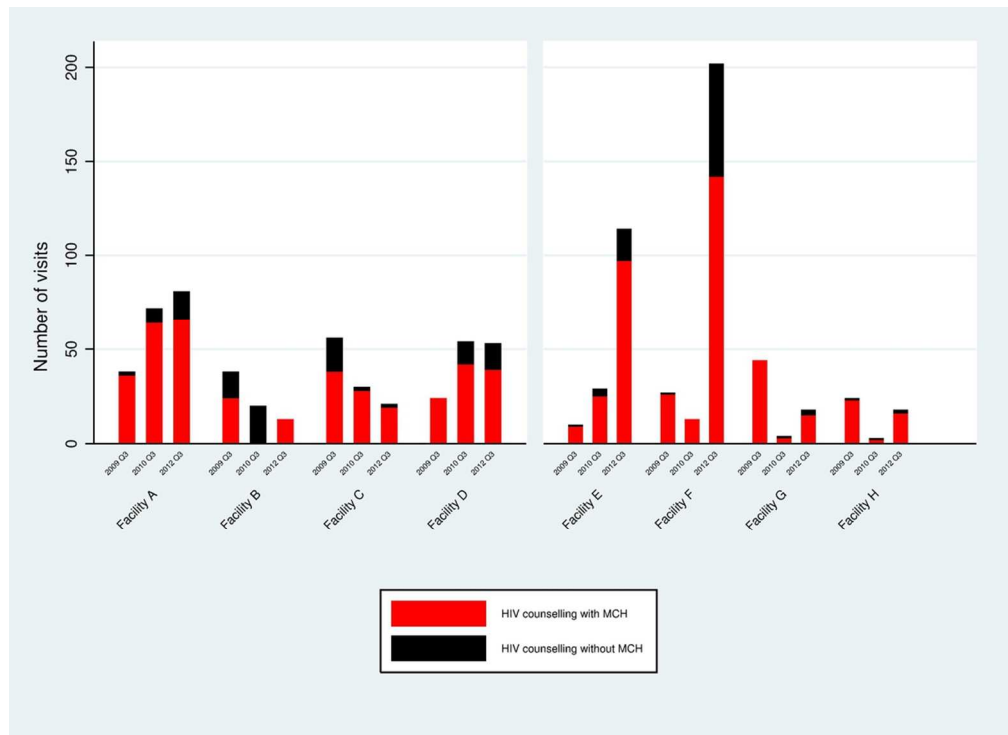

Figure 2. Number of visits receiving any HIV counselling services, by facility and integration with MCH services  
101x73mm (300 x 300 DPI)

Review only

Supplementary Table 1. Proportion of visits in which key HIV/STI and MCH services were received, by facility and year

| Intervention                      | Facility A  |             |             | Facility B  |             |             | Facility C  |             |             | Facility D  |             |             |
|-----------------------------------|-------------|-------------|-------------|-------------|-------------|-------------|-------------|-------------|-------------|-------------|-------------|-------------|
|                                   | 2009        | 2010        | 2012        | 2009        | 2010        | 2012        | 2009        | 2010        | 2012        | 2009        | 2010        | 2012        |
| <b>N</b>                          | 590         | 475         | 532         | 855         | 263         | 408         | 211         | 184         | 241         | 753         | 411         | 607         |
| <b>HIV/STI services received</b>  |             |             |             |             |             |             |             |             |             |             |             |             |
| HIV testing                       | 40 (6.8%)   | 39 (8.2%)   | 125 (23.5%) | 20 (2.3%)   | 6 (2.3%)    | 14 (3.4%)   | 13 (6.2%)   | 8 (4.3%)    | 15 (6.2%)   | 10 (1.3%)   | 29 (7.1%)   | 33 (5.4%)   |
| HIV counselling                   | 38 (6.4%)   | 72 (15.2%)  | 81 (15.2%)  | 38 (4.4%)   | 20 (7.6%)   | 13 (3.2%)   | 56 (26.5%)  | 30 (16.3%)  | 21 (8.7%)   | 24 (3.2%)   | 54 (13.1%)  | 53 (8.7%)   |
| HIV treatment                     | 4 (.7%)     | 9 (1.9%)    | 14 (2.6%)   | 139 (16.3%) | 21 (8%)     | 70 (17.2%)  | 29 (13.7%)  | 10 (5.4%)   | 108 (44.8%) | 65 (8.6%)   | 1 (.2%)     | 78 (12.9%)  |
| PMTCT                             | 0 (0%)      | 30 (6.3%)   | 27 (5.1%)   | 0 (0%)      | 1 (.4%)     | 24 (5.9%)   | 0 (0%)      | 7 (3.8%)    | 7 (2.9%)    | 0 (0%)      | 71 (17.3%)  | 28 (4.6%)   |
| STI counselling & testing         | 13 (2.2%)   | 0 (0%)      | 49 (9.2%)   | 65 (7.6%)   | 49 (18.6%)  | 9 (2.2%)    | 46 (21.8%)  | 1 (.5%)     | 5 (2.1%)    | 59 (7.8%)   | 5 (1.2%)    | 28 (4.6%)   |
| Any HIV/STI service               | 57 (9.7%)   | 83 (17.5%)  | 202 (38%)   | 218 (25.5%) | 74 (28.1%)  | 109 (26.7%) | 92 (43.6%)  | 47 (25.5%)  | 135 (56%)   | 138 (18.3%) | 87 (21.2%)  | 159 (26.2%) |
| <b>MCH services received</b>      |             |             |             |             |             |             |             |             |             |             |             |             |
| Family planning provision         | 176 (29.8%) | 97 (20.4%)  | 105 (19.7%) | 147 (17.2%) | 38 (14.4%)  | 63 (15.4%)  | 56 (26.5%)  | 46 (25%)    | 18 (7.5%)   | 67 (8.9%)   | 40 (9.7%)   | 100 (16.5%) |
| Family planning counselling       | 65 (11%)    | 44 (9.3%)   | 93 (17.5%)  | 84 (9.8%)   | 9 (3.4%)    | 52 (12.7%)  | 70 (33.2%)  | 19 (10.3%)  | 33 (13.7%)  | 77 (10.2%)  | 40 (9.7%)   | 130 (21.4%) |
| ANC                               | 145 (24.6%) | 74 (15.6%)  | 49 (9.2%)   | 102 (11.9%) | 19 (7.2%)   | 78 (19.1%)  | 49 (23.2%)  | 46 (25%)    | 20 (8.3%)   | 322 (42.8%) | 48 (11.7%)  | 86 (14.2%)  |
| PNC (mother or baby)              | 53 (9%)     | 35 (7.4%)   | 11 (2.1%)   | 32 (3.7%)   | 10 (3.8%)   | 16 (3.9%)   | 16 (7.6%)   | 9 (4.9%)    | 10 (4.1%)   | 54 (7.2%)   | 23 (5.6%)   | 28 (4.6%)   |
| Cervical screen                   | 2 (.3%)     | 1 (.2%)     | 3 (.6%)     | 8 (.9%)     | 0 (0%)      | 2 (.5%)     | 3 (1.4%)    | 1 (.5%)     | 0 (0%)      | 348 (46.2%) | 1 (.2%)     | 11 (1.8%)   |
| Child health (incl. Immunization) | 320 (54.2%) | 277 (58.3%) | 174 (32.7%) | 319 (37.3%) | 90 (34.2%)  | 157 (38.5%) | 93 (44.1%)  | 81 (44%)    | 47 (19.5%)  | 155 (20.6%) | 128 (31.1%) | 268 (44.2%) |
| Other reproductive health service | 1 (.2%)     | 0 (0%)      | 1 (.2%)     | 11 (1.3%)   | 7 (2.7%)    | 4 (1%)      | 2 (.9%)     | 1 (.5%)     | 5 (2.1%)    | 58 (7.7%)   | 27 (6.6%)   | 0 (0%)      |
| Any MCH service                   | 550 (93.2%) | 441 (92.8%) | 326 (61.3%) | 543 (63.5%) | 147 (55.9%) | 313 (76.7%) | 175 (82.9%) | 167 (90.8%) | 106 (44%)   | 610 (81%)   | 256 (62.3%) | 476 (78.4%) |
| Comparison                        | Facility E  |             |             | Facility F  |             |             | Facility G  |             |             | Facility H  |             |             |
|                                   | 2009        | 2010        | 2012        | 2009        | 2010        | 2012        | 2009        | 2010        | 2012        | 2009        | 2010        | 2012        |
| <b>N</b>                          | 220         | 215         | 380         | 317         | 333         | 347         | 146         | 170         | 114         | 169         | 35          | 287         |
| <b>HIV/STI services received</b>  |             |             |             |             |             |             |             |             |             |             |             |             |
| HIV testing                       | 14 (6.4%)   | 16 (7.4%)   | 33 (8.7%)   | 14 (4.4%)   | 4 (1.2%)    | 16 (4.6%)   | 19 (13%)    | 0 (0%)      | 16 (14%)    | 22 (13%)    | 0 (0%)      | 6 (2.1%)    |
| HIV counselling                   | 10 (4.5%)   | 29 (13.5%)  | 114 (30%)   | 27 (8.5%)   | 13 (3.9%)   | 202 (58.2%) | 44 (30.1%)  | 4 (2.4%)    | 18 (15.8%)  | 24 (14.2%)  | 3 (8.6%)    | 18 (6.3%)   |
| HIV treatment                     | 9 (4.1%)    | 12 (5.6%)   | 31 (8.2%)   | 18 (5.7%)   | 7 (2.1%)    | 173 (49.9%) | 41 (28.1%)  | 78 (45.9%)  | 48 (42.1%)  | 4 (2.4%)    | 0 (0%)      | 96 (33.4%)  |
| PMTCT                             | 0 (0%)      | 28 (13%)    | 50 (13.2%)  | 0 (0%)      | 18 (5.4%)   | 15 (4.3%)   | 0 (0%)      | 9 (5.3%)    | 7 (6.1%)    | 0 (0%)      | 6 (17.1%)   | 16 (5.6%)   |
| STI counselling & testing         | 8 (3.6%)    | 13 (6%)     | 43 (11.3%)  | 24 (7.6%)   | 0 (0%)      | 101 (29.1%) | 15 (10.3%)  | 0 (0%)      | 3 (2.6%)    | 25 (14.8%)  | 0 (0%)      | 7 (2.4%)    |
| Any HIV/STI service               | 30 (13.6%)  | 64 (29.8%)  | 176 (46.3%) | 57 (18%)    | 36 (10.8%)  | 253 (72.9%) | 74 (50.7%)  | 91 (53.5%)  | 69 (60.5%)  | 45 (26.6%)  | 7 (20%)     | 123 (42.9%) |
| <b>MCH services received</b>      |             |             |             |             |             |             |             |             |             |             |             |             |
| Family planning provision         | 52 (23.6%)  | 57 (26.5%)  | 100 (26.3%) | 73 (23%)    | 128 (38.4%) | 39 (11.2%)  | 47 (32.2%)  | 12 (7.1%)   | 17 (14.9%)  | 43 (25.4%)  | 8 (22.9%)   | 32 (11.1%)  |
| Family planning counselling       | 23 (10.5%)  | 64 (29.8%)  | 148 (38.9%) | 41 (12.9%)  | 38 (11.4%)  | 117 (33.7%) | 44 (30.1%)  | 6 (3.5%)    | 23 (20.2%)  | 43 (25.4%)  | 7 (20%)     | 50 (17.4%)  |
| ANC                               | 45 (20.5%)  | 41 (19.1%)  | 58 (15.3%)  | 199 (62.8%) | 83 (24.9%)  | 40 (11.5%)  | 49 (33.6%)  | 7 (4.1%)    | 13 (11.4%)  | 49 (29%)    | 0 (0%)      | 21 (7.3%)   |
| PNC (mother or baby)              | 2 (.9%)     | 17 (7.9%)   | 14 (3.7%)   | 17 (5.4%)   | 20 (6%)     | 3 (.9%)     | 5 (3.4%)    | 1 (.6%)     | 9 (7.9%)    | 11 (6.5%)   | 1 (2.9%)    | 16 (5.6%)   |
| Cervical screen                   | 2 (.9%)     | 0 (0%)      | 23 (6.1%)   | 3 (.9%)     | 0 (0%)      | 0 (0%)      | 2 (1.4%)    | 0 (0%)      | 0 (0%)      | 6 (3.6%)    | 0 (0%)      | 2 (.7%)     |
| Child health (incl. Immunization) | 135 (61.4%) | 102 (47.4%) | 118 (31.1%) | 198 (62.5%) | 111 (33.3%) | 84 (24.2%)  | 81 (55.5%)  | 43 (25.3%)  | 22 (19.3%)  | 62 (36.7%)  | 31 (88.6%)  | 89 (31%)    |
| Other reproductive health service | 0 (0%)      | 0 (0%)      | 3 (.8%)     | 0 (0%)      | 0 (0%)      | 0 (0%)      | 0 (0%)      | 0 (0%)      | 2 (1.8%)    | 1 (.6%)     | 0 (0%)      | 3 (1%)      |
| Any MCH service                   | 204 (92.7%) | 204 (94.9%) | 312 (82.1%) | 311 (98.1%) | 322 (96.7%) | 238 (68.6%) | 133 (91.1%) | 63 (37.1%)  | 61 (53.5%)  | 133 (78.7%) | 33 (94.3%)  | 165 (57.5%) |



**Integration of HIV and maternal health care in a high HIV-prevalence setting: Analysis of client flow data over time in Swaziland**

|                                 |                                                                                                                                                                                                                                                                                                                                                                                                                                                                                                                                                                                                                                                                                                                                                                                      |
|---------------------------------|--------------------------------------------------------------------------------------------------------------------------------------------------------------------------------------------------------------------------------------------------------------------------------------------------------------------------------------------------------------------------------------------------------------------------------------------------------------------------------------------------------------------------------------------------------------------------------------------------------------------------------------------------------------------------------------------------------------------------------------------------------------------------------------|
| Journal:                        | <i>BMJ Open</i>                                                                                                                                                                                                                                                                                                                                                                                                                                                                                                                                                                                                                                                                                                                                                                      |
| Manuscript ID:                  | bmjopen-2013-003715.R1                                                                                                                                                                                                                                                                                                                                                                                                                                                                                                                                                                                                                                                                                                                                                               |
| Article Type:                   | Research                                                                                                                                                                                                                                                                                                                                                                                                                                                                                                                                                                                                                                                                                                                                                                             |
| Date Submitted by the Author:   | 23-Nov-2013                                                                                                                                                                                                                                                                                                                                                                                                                                                                                                                                                                                                                                                                                                                                                                          |
| Complete List of Authors:       | Birdthistle, Isolde; London School of Hygiene & Tropical Medicine, Department of Population Health<br>Mayhew, Susannah; London School of Hygiene & Tropical Medicine, Department of Global Health & Development<br>Kikuvi, Joshua; London School of Hygiene & Tropical Medicine, Department of Global Health & Development<br>Zhou, Weiwei; London School of Hygiene & Tropical Medicine, Department of Global Health & Development<br>Church, Kathryn; London School of Hygiene & Tropical Medicine, Department of Global Health & Development<br>Warren, Charlotte; Population Council,<br>Nkambule, Rejoice; Government of the Kingdom of Swaziland, Ministry of Health<br>Fenty, Justin; London School of Hygiene & Tropical Medicine, Department of Global Health & Development |
| <b>Primary Subject Heading</b>: | Health services research                                                                                                                                                                                                                                                                                                                                                                                                                                                                                                                                                                                                                                                                                                                                                             |
| Secondary Subject Heading:      | Global health, HIV/AIDS, Research methods, Reproductive medicine, Sexual health                                                                                                                                                                                                                                                                                                                                                                                                                                                                                                                                                                                                                                                                                                      |
| Keywords:                       | HIV & AIDS < INFECTIOUS DISEASES, Maternal medicine < OBSTETRICS, REPRODUCTIVE MEDICINE, SEXUAL MEDICINE                                                                                                                                                                                                                                                                                                                                                                                                                                                                                                                                                                                                                                                                             |
|                                 |                                                                                                                                                                                                                                                                                                                                                                                                                                                                                                                                                                                                                                                                                                                                                                                      |

SCHOLARONE™  
Manuscripts

**Title**

Integration of HIV and maternal health care in a high HIV-prevalence setting: Analysis of client flow data over time in Swaziland

**Authors and Affiliations**

Isolde J Birdthistle<sup>a</sup>, Susannah Mayhew<sup>b</sup>, Joshua Kikvi<sup>b,c</sup>, Weiwei Zhou<sup>b</sup>, Kathryn Church<sup>b</sup>, Charlotte Warren<sup>c</sup>, Rejoice Nkambule<sup>d</sup>, Justin Fenty<sup>b</sup> on behalf of the Integra Initiative

<sup>a</sup> Department of Population Health, London School of Hygiene & Tropical Medicine, London, UK

<sup>b</sup> Department of Global Health and Development, London School of Hygiene & Tropical Medicine, London, UK

<sup>c</sup> Population Council, Kenya

<sup>d</sup> Ministry of Health, Government of the Kingdom of Swaziland

**Corresponding author:**

Isolde J Birdthistle

Department of Population Health

Faculty of Epidemiology and Population Health

London School of Hygiene & Tropical Medicine

Room 145, Keppel Street, London, WC1E 7HT

E-mail: [Isolde.Birdthistle@lshtm.ac.uk](mailto:Isolde.Birdthistle@lshtm.ac.uk) Tel: +44 (0)20 7612 7889 Fax: +44 (0)20 7436 5389

**Word count:** 3190

## ABSTRACT

### Objective

Maternal and child health (MCH) care may provide an entry point for HIV services in high HIV-prevalence settings. Our objective was to assess integration of HIV with MCH services in public sector facilities in Swaziland.

### Design

In 2009, 2010 and 2012, client flow assessments were conducted over five days in the MCH units of eight government facilities, purposively selected as intervention or comparison sites.

### Participants

8263 MCH visits with female clients were tracked: 3261 in 2009; 2086 in 2010; and 2916 in 2012.

### Intervention

Activities and resources to strengthen integration of HIV services into post-natal care, 2009 - 2010.

### Main outcome measures

- (1) The proportion of all visits in which an HIV/STI testing, counselling or treatment was received together with an MCH service;
- (2) The proportion of all visits in which a client receives HIV counselling.

## Results

Across facilities, the proportion of visits in which both HIV/STI and MCH services were received varied considerably, e.g., from 9%-49% in 2009. HIV/STI services were integrated most frequently with child health, ante-natal care (ANC) and family planning – the most common reasons for women’s attendance – and least often with post-natal care (PNC) and cervical screening. There was no meaningful difference in integration over time by design group, and considerable heterogeneity across facilities. Receipt of integrated services increased in one intervention and two comparison facilities, where HIV counseling also rose, and fell in one intervention and two comparison facilities.

## Conclusions

Provision of HIV/STI services with MCH care occurred at all facilities, yet relatively few women receive integrated services. Increases in integration were driven by increases in HIV counseling while sharp declines in some facilities indicate integration is difficult to sustain. Opportunities for intensifying HIV integration lie with ANC, child health and family planning, while HIV-PNC integration will remain limited until more women attend PNC.

## Trial registry and number

Current Controlled Trials NCT01694862

## ARTICLE SUMMARY

### Article focus

- Maternal health care may provide an entry point for HIV services in high HIV-prevalence settings, yet little is known about actual integration of HIV with maternal care – or how integrated provision can be improved – in public sector facilities.
- Client flow assessments were conducted over five days in MCH units of eight facilities in Swaziland in 2009, 2010 and 2012 (N=8263 visits tracked) to determine the extent to which HIV/STI services were received with MCH services in the same visit, and in what combinations.
- We also assessed whether these outcomes improved with time in facilities which received an intervention designed to strengthen integration of HIV into post-natal care services (the Integra Initiative).

### Key messages

- Some provision of HIV/STI services with MCH care occurred at all facilities, indicating a capacity to integrate services in the public sector, yet relatively few women receive integrated services.
- In three facilities, increases in integration over time were driven by increases in HIV counselling. Sharp declines in other facilities suggest integration is difficult to sustain, given frequent staff rotation and vertical HIV treatment campaigns that can divert resources for integration.



- 1  
2  
3  
4  
5  
6  
7  
8  
9  
10  
11  
12  
13  
14  
15  
16  
17  
18  
19  
20  
21  
22  
23  
24  
25  
26  
27  
28  
29  
30  
31  
32  
33  
34  
35  
36  
37  
38  
39  
40  
41  
42  
43  
44  
45  
46  
47  
48  
49  
50  
51  
52  
53  
54  
55  
56  
57  
58  
59  
60
- There was no evidence of an increase in integration in three of four intervention facilities. Impact of the intervention to strengthen integration of HIV into PNC will remain limited until more women attend PNC; the best opportunities for scaling up HIV integration may lie with ANC, child health and family planning, given their frequent use.

### Strengths and limitations of this study

- The main strength is the scale and novelty of client flow data in public sector facilities in sub-Saharan Africa, offering detailed combinations of services received in every consultation. Such detail is typically unavailable from routine health information systems.
- An important limitation is the logistical challenge in conducting client flow assessments simultaneously across eight government facilities, affecting comparability of data across facilities and time points.

## INTRODUCTION

Maternal mortality and HIV have been described as “intersecting epidemics” which must be simultaneously tackled.<sup>1, 2</sup> In the setting for this study – Swaziland, where more than 40% of pregnant women are infected with HIV – HIV is intimately linked with maternal mortality and hinders efforts to lower maternal death rates.<sup>3, 4</sup>

Since the International Conference on Population and Development in 1994, a strong case has been made for integrating HIV services into sexual and reproductive health (SRH) with potential benefits for both clients and facilities.<sup>5, 6</sup> Integration can simultaneously address clients’ reproductive health goals and their needs for HIV prevention and treatment and PMTCT.<sup>7</sup> Process evaluations of integrated HIV and family planning (FP) services indicate that facilities can gain by increasing the provision, uptake and efficiency of services while improving client satisfaction and reducing HIV-related stigma in clinics.<sup>8</sup>

More recently, the case for expanding integration of HIV/AIDS services to maternal, neonatal, child health and nutrition, including family planning, is supported in a systematic review which concludes that integration of such services is feasible to implement under certain circumstances.<sup>9</sup> Furthermore, such integration can yield positive effects on the quality of services as well as client outcomes including contraceptive use, antiretroviral therapy in pregnancy, and HIV testing.<sup>9</sup>

Maternal and child health services can thus serve as entry points for HIV prevention, treatment and care, particularly in contexts of high HIV prevalence. Yet little is known about existing

1  
2  
3 levels of integration, particularly in public sector health facilities, or how provision can be  
4  
5 improved and scaled up.<sup>8</sup>  
6  
7

8  
9 The Integra Initiative is a large-scale non-randomised evaluation designed to assess different  
10  
11 models of SRH-HIV integration, including the integration of HIV/STI services with post-natal  
12  
13 care (PNC) in Swaziland. Although not a randomised controlled trial, Integra was registered for  
14  
15 good practice and transparency (Current Controlled Trials NCT01694862). The specific models  
16  
17 of integration – including the use of post-natal care as an entry point for HIV/STI services in  
18  
19 Swaziland – and their hypothesised benefits for clients and health care efficiency are detailed  
20  
21 in the Integra study protocol.<sup>10</sup>  
22  
23  
24

25  
26 As part of the Integra Initiative, this study analysed client flow data collected in eight public  
27  
28 sector facilities in Swaziland in 2009, 2010 and 2012, to determine whether clients seeking  
29  
30 maternal and child health services (MCH) receive integrated services, and if so, in what  
31  
32 combinations of HIV/STI and MCH services.<sup>10</sup> We also sought to understand how the receipt  
33  
34 of integrated services differs over time and between facilities which did and did not receive the  
35  
36 Integra intervention. We hoped the answers would help identify gaps and opportunities for  
37  
38 integrating HIV within maternal health services and achieving universal access to both.  
39  
40  
41  
42  
43  
44  
45

## 46 **METHODS**

### 47 48 49 **Data Collection**

50  
51  
52 As part of Integra's non-randomised design, eight public sector facilities were selected from  
53  
54 three of Swaziland's four regions. Four facilities were purposively designated as Intervention  
55  
56 facilities (referred to as Facilities A-D), based on their previous participation in an operations  
57  
58  
59  
60

1  
2  
3 research study by Population Council, one of the Integra institutional partners.<sup>11</sup> Four  
4  
5 comparison facilities were selected based on their distance from intervention sites (to avoid  
6  
7 contamination) and no current provision of integrated HIV-PNC services (Facilities E-H), as  
8  
9 determined by discussions with the Ministry of Health and site visits by Population Council.  
10  
11  
12

13  
14  
15  
16 In the intervention facilities, between October 2009 and December 2010, Integra delivered a  
17  
18 programme designed to strengthen and maintain the provision of integrated HIV and PNC  
19  
20 services. The intervention components included: (a) a training package to facilitate mentoring  
21  
22 of front-line health providers by more experienced providers; (b) job aids to promote  
23  
24 integration, including the Balanced Counselling Strategy Plus (BCS+) toolkit containing an  
25  
26 algorithm, counselling cards and brochures to support counselling, including HIV service  
27  
28 provision, within PNC consultations,<sup>11, 12</sup> and (c) ongoing support to discuss role clarification,  
29  
30 organisational change, referral/linkages and management of service statistics.  
31  
32  
33  
34  
35  
36  
37

38 The client flow assessments (CFAs) comprise one data component of the Integra evaluation.  
39  
40 The CFAs were modelled on the Patient Flow Analysis, a method developed by the Centers for  
41  
42 Disease Control in the 1970s to track patients' movements through a clinic over one day,<sup>13, 14</sup>  
43  
44 and shown to be effective in measuring intervention effectiveness within the context of usual  
45  
46 practice.<sup>15</sup> In this context, CFAs were designed to capture service utilisation patterns among  
47  
48 clients seeking MCH services, given that data on integrated service provision were not  
49  
50 available from routine clinical data (which collect data on different services in separate  
51  
52 registers). Specifically, CFAs were conducted in all study facilities in November 2009, December  
53  
54 2010, and August 2012. Over a period of five days, Monday through Friday, all clients entering  
55  
56  
57  
58  
59  
60

1  
2  
3 the facility for MCH health services were given a client flow form by teams of trained local  
4  
5 researchers or service providers. Clients carried the form throughout their visit, and each  
6  
7 service provider they saw completed the form in their consultation room/cubicle, indicating  
8  
9 session start/end times, the service(s) received by the client and any referrals to other  
10  
11 providers.  
12  
13

14  
15  
16  
17  
18 The first CFA (late November 2009) was conducted soon after the intervention began in  
19  
20 October 2009, but before it was fully implemented in any site. For logistical reasons, the client  
21  
22 flow assessments could not be conducted in the same week of each year. And specific  
23  
24 circumstances in some facilities meant the assessments could not be simultaneous in all eight  
25  
26 sites, as the protocol had intended.  
27  
28  
29

### 30 31 **Data analysis** 32 33

34  
35 We defined our unit of analysis to be a visit, which comprised all providers seen and services  
36  
37 received in the same day for each client, as captured on the client assessment form. Clients  
38  
39 were either a single adult or an adult plus a child. We excluded visits of males aged 12 years or  
40  
41 over, to focus on maternal and child health services. The age of 12 was selected as  
42  
43 reproductive health services were received by females as young as 12.  
44  
45  
46

47 The following primary and secondary outcomes were calculated for each facility and time  
48  
49 point:  
50  
51

- 52  
53 1. Receipt of integrated HIV-MCH services: the proportion of all visits in which a client  
54  
55 receives any HIV or STI service, specifically: HIV testing, counselling or treatment;  
56  
57 PMTCT; or STI counselling or testing  
58  
59  
60

1  
2  
3 *and*  
4  
5

6 any of the following MCH services: FP counselling or provision; PNC for mother or  
7  
8 baby; cervical cancer screening; child health (including weighing and immunisations);  
9  
10 and antenatal care (ANC).  
11

12  
13  
14 We hypothesised that HIV-MCH integration would increase in facilities which received  
15  
16 the Integra intervention.  
17

- 18  
19  
20 2. Receipt of HIV counselling: the proportion of all visits in which a client receives HIV  
21  
22 counselling.  
23

24  
25 We hypothesised that HIV counselling would increase as a result of the Integra  
26  
27 intervention, regardless of women's need for HIV testing or treatment which are not  
28  
29 constant (medical histories, including the need for testing or treatment, were not  
30  
31 captured on the CFA form).  
32  
33

34  
35 We also sought to describe which MCH services were most commonly combined with HIV/STI  
36  
37 services, by calculating the percentage of visits in which an HIV/STI service was combined with  
38  
39 each type of MCH service. We examined the change over time in the proportion of visits  
40  
41 receiving integrated HIV/STI and MCH services (primary outcome) and HIV counselling  
42  
43 (secondary outcome) separately for each facility. We used the 95% confidence interval around  
44  
45 the difference (in the 2010 and 2012 proportions compared to 2009) as an indication of  
46  
47 whether the observed change was due to chance (if it included the null value of zero).  
48  
49  
50

51  
52 To examine differences in the key outcomes by design group, we calculated the risk difference  
53  
54 in 2010 and 2012 (each compared to 2009) for intervention versus comparison facilities for  
55  
56 both the primary and secondary outcomes using a two-stage approach. In the first stage we  
57  
58  
59  
60

1  
2  
3 estimated facility-level residuals by fitting a logistic regression model and including terms to  
4  
5 adjust for baseline value (corresponding proportion of visits in 2009), average annual client  
6  
7 load (<10000, 10000+), and rural/urban status. Difference residuals were then obtained as the  
8  
9 difference between the observed and predicted values (divided by facility size). In the second  
10  
11 stage we analysed the facility-level residuals, based on the assumption that in the absence of  
12  
13 any intervention effect the residuals should be distributed normally with no systematic  
14  
15 difference between the intervention and comparison arms. Difference residuals were analysed  
16  
17 using linear regression including an interaction term representing the difference in 'change  
18  
19 from baseline' between the design groups.  
20  
21  
22  
23  
24  
25

### 26 **Ethics Statement**

27  
28  
29 Ethics approval for the client flow assessments was obtained from the Swaziland Scientific  
30  
31 Review Board, the London School of Hygiene & Tropical Medicine and the Population Council  
32  
33 Institutional Review Board.  
34  
35  
36  
37  
38  
39

### 40 **RESULTS**

41  
42  
43 Across eight facilities, 3261 visits were tracked in November 2009, 2086 visits in December  
44  
45 2010, and 2916 in August 2012. Table 1 presents general characteristics of the visits and  
46  
47 facilities. Additional details about each facility are provided in Supplementary Table 1. Overall,  
48  
49 about half of the visits included an adult female and child (under 12 years), versus an adult  
50  
51 client only, although this proportion varied across facilities (range: 28%-95%). In almost all  
52  
53 facilities, clients received on average more than one service during their visit, with many  
54  
55 receiving two or more. Each year, approximately eight percent of clients did not receive any  
56  
57  
58  
59  
60

1  
2  
3 service or referral during their visit, with the highest proportions in the facilities with highest  
4  
5 client load (e.g., 18% of clients in Facility B and 31% in Facility D in 2010). In all facilities, and in  
6  
7 both years, child health services were either the first or second most common service received.  
8  
9 Family planning counselling or provision, and ante-natal care, were among the top three  
10  
11 services for most facilities. Across facilities, the least common services received were post-natal  
12  
13 care and cervical screening (See Supplementary Table 2).  
14  
15  
16  
17  
18  
19  
20  
21  
22  
23  
24  
25  
26  
27  
28  
29  
30  
31  
32  
33  
34  
35  
36  
37  
38  
39  
40  
41  
42  
43  
44  
45  
46  
47  
48  
49  
50  
51  
52  
53  
54  
55  
56  
57  
58  
59  
60



Table 1. Characteristics of the facilities, visits and services tracked in 2009, 2010 and 2012

| Intervention                                                     | Facility A  |             |             | Facility B  |             |             | Facility C  |             |             | Facility D  |             |             |
|------------------------------------------------------------------|-------------|-------------|-------------|-------------|-------------|-------------|-------------|-------------|-------------|-------------|-------------|-------------|
|                                                                  | 2009        | 2010        | 2012        | 2009        | 2010        | 2012        | 2009        | 2010        | 2012        | 2009        | 2010        | 2012        |
| <b>Visits tracked</b>                                            | 590         | 475         | 532         | 855         | 263         | 408         | 211         | 184         | 241         | 753         | 411         | 607         |
| <b>Client category</b>                                           |             |             |             |             |             |             |             |             |             |             |             |             |
| Adult (12+ years) only                                           | 395 (66.9%) | 196 (41.3%) | 211 (39.7%) | 443 (51.8%) | 153 (58.2%) | 172 (42.2%) | 144 (68.2%) | 87 (47.3%)  | 82 (34%)    | 310 (41.2%) | 197 (47.9%) | 408 (67.2%) |
| Adult + child                                                    | 176 (29.8%) | 278 (58.5%) | 320 (60.2%) | 153 (17.9%) | 109 (41.4%) | 236 (57.8%) | 64 (30.3%)  | 97 (52.7%)  | 156 (64.7%) | 93 (12.4%)  | 213 (51.8%) | 198 (32.6%) |
| <b>Adult age</b>                                                 |             |             |             |             |             |             |             |             |             |             |             |             |
| Mean [sd]                                                        | 26.2 [6.4]  | 26.2 [7.2]  | 26.3 [6.5]  | 26.8 [8.2]  | 27 [7.2]    | 26.6 [7.3]  | 28.5 [8.4]  | 26.8 [8]    | 27.7 [8.5]  | 27.6 [7.4]  | 27.3 [8.4]  | 31.3 [10.2] |
| Missing                                                          | 9 (1.5%)    | 258 (54.3%) | 17 (3.2%)   | 357 (41.8%) | 40 (15.2%)  | 13 (3.2%)   | 2 (.9%)     | 2 (1.1%)    | 1 (.4%)     | 382 (50.7%) | 165 (40.1%) | 12 (2%)     |
| <b>Services received per visit</b>                               |             |             |             |             |             |             |             |             |             |             |             |             |
| None                                                             | 37 (6.3%)   | 24 (5.1%)   | 88 (16.5%)  | 134 (15.7%) | 47 (17.9%)  | 23 (5.6%)   | 11 (5.2%)   | 6 (3.3%)    | 32 (13.3%)  | 93 (12.4%)  | 129 (31.4%) | 29 (4.8%)   |
| One                                                              | 319 (54.1%) | 106 (22.3%) | 192 (36.1%) | 479 (56%)   | 145 (55.1%) | 208 (51%)   | 47 (22.3%)  | 57 (31%)    | 114 (47.3%) | 246 (32.7%) | 135 (32.8%) | 238 (39.2%) |
| Two or more                                                      | 234 (39.7%) | 345 (72.6%) | 252 (47.4%) | 242 (28.3%) | 71 (27%)    | 177 (43.4%) | 153 (72.5%) | 121 (65.8%) | 95 (39.4%)  | 414 (55%)   | 147 (35.8%) | 340 (56%)   |
| <b>Visits where ≥1 service received</b>                          |             |             |             |             |             |             |             |             |             |             |             |             |
| Mean [sd] services received                                      | 1.8 [1.3]   | 2.5 [1.4]   | 2.6 [2]     | 1.6 [1.1]   | 1.4 [8]     | 2 [1.6]     | 2.6 [1.7]   | 2 [1]       | 1.9 [1.3]   | 2.1 [1.2]   | 2 [1.3]     | 2 [1.3]     |
| Mean [sd] providers seen                                         | 1.3 [5]     | 1.5 [5]     | 1.6 [9]     | 1.2 [4]     | 1 [2]       | 1.4 [7]     | 1.3 [5]     | 1.1 [4]     | 1.3 [5]     | 1.5 [7]     | 1.5 [7]     | 1.1 [3]     |
| <b>Visits where no services were either referred or received</b> | 36 (6.1%)   | 22 (4.6%)   | 88 (16.5%)  | 112 (13.1%) | 47 (17.9%)  | 15 (3.7%)   | 7 (3.3%)    | 6 (3.3%)    | 16 (6.6%)   | 81 (10.8%)  | 69 (16.8%)  | 29 (4.8%)   |
| <b>Average annual client load*</b>                               | 32,321      |             |             | 65,794      |             |             | 9,974       |             |             | 40,485      |             |             |
| <b>Setting (urban/rural)</b>                                     | Urban       |             |             | Urban       |             |             | Peri-urban  |             |             | Urban       |             |             |
| Comparison                                                       | Facility E  |             |             | Facility F  |             |             | Facility G  |             |             | Facility H  |             |             |
|                                                                  | 2009        | 2010        | 2012        | 2009        | 2010        | 2012        | 2009        | 2010        | 2012        | 2009        | 2010        | 2012        |
| <b>Visits tracked</b>                                            | 220         | 215         | 380         | 317         | 333         | 347         | 146         | 170         | 114         | 169         | 35          | 287         |
| <b>Client category</b>                                           |             |             |             |             |             |             |             |             |             |             |             |             |
| Adult (12+ years) only                                           | 131 (59.5%) | 72 (33.5%)  | 234 (61.6%) | 194 (61.2%) | 183 (55%)   | 154 (44.4%) | 74 (50.7%)  | 106 (62.4%) | 47 (41.2%)  | 110 (65.1%) | 2 (5.7%)    | 178 (62%)   |
| Adult + child                                                    | 78 (35.5%)  | 143 (66.5%) | 145 (38.2%) | 117 (36.9%) | 150 (45%)   | 193 (55.6%) | 69 (47.3%)  | 64 (37.6%)  | 67 (58.8%)  | 48 (28.4%)  | 33 (94.3%)  | 107 (37.3%) |
| <b>Adult age</b>                                                 |             |             |             |             |             |             |             |             |             |             |             |             |
| Mean [sd]                                                        | 26 [7.5]    | 26 [5.9]    | 34.5 [12.6] | 26.1 [6.2]  | 26.4 [6.3]  | 26.5 [7.4]  | 27.4 [7.8]  | 31.4 [10.8] | 26.5 [7.2]  | 25.1 [6]    | 29.5 [10.6] | 30.9 [11.9] |
| Missing                                                          | 1 (.5%)     | 95 (44.2%)  | 53 (13.9%)  | 5 (1.6%)    | 124 (37.2%) | 9 (2.6%)    | 0 (0%)      | 6 (3.5%)    | 5 (4.4%)    | 0 (0%)      | 33 (94.3%)  | 67 (23.3%)  |
| <b>Services received per visit</b>                               |             |             |             |             |             |             |             |             |             |             |             |             |
| None                                                             | 10 (4.5%)   | 3 (1.4%)    | 13 (3.4%)   | 1 (.3%)     | 5 (1.5%)    | 8 (2.3%)    | 11 (7.5%)   | 6 (3.5%)    | 14 (12.3%)  | 31 (18.3%)  | 0 (0%)      | 29 (10.1%)  |
| One                                                              | 99 (45%)    | 34 (15.8%)  | 45 (11.8%)  | 100 (31.5%) | 177 (53.2%) | 46 (13.3%)  | 19 (13%)    | 84 (49.4%)  | 32 (28.1%)  | 32 (18.9%)  | 8 (22.9%)   | 155 (54%)   |
| Two or more                                                      | 111 (50.5%) | 178 (82.8%) | 322 (84.7%) | 216 (68.1%) | 151 (45.3%) | 293 (84.4%) | 116 (79.5%) | 80 (47.1%)  | 68 (59.6%)  | 106 (62.7%) | 27 (77.1%)  | 103 (35.9%) |
| <b>Visits where ≥1 service received</b>                          |             |             |             |             |             |             |             |             |             |             |             |             |
| Mean [sd] services received                                      | 1.8 [1.1]   | 2.4 [1.1]   | 3.2 [1.6]   | 2.3 [1.6]   | 1.6 [9]     | 3.4 [1.6]   | 3.2 [1.6]   | 1.6 [6]     | 2.6 [1.6]   | 2.7 [1.6]   | 2.8 [1.3]   | 1.8 [1.5]   |
| Mean [sd] providers seen                                         | 1.3 [5]     | 1.1 [2]     | 1.7 [7]     | 1.8 [8]     | 1 [2]       | 1.3 [6]     | 1.5 [5]     | 1.4 [6]     | 1.3 [6]     | 1.4 [6]     | 1.1 [3]     | 1.2 [5]     |
| <b>Visits where no services were either referred or received</b> | 9 (4.1%)    | 2 (.9%)     | 12 (3.2%)   | 1 (.3%)     | 5 (1.5%)    | 7 (2%)      | 11 (7.5%)   | 5 (2.9%)    | 8 (7%)      | 3 (1.8%)    | 0 (0%)      | 21 (7.3%)   |
| <b>Average annual client load*</b>                               | 7,736       |             |             | 28,202      |             |             | 9,674       |             |             | 6,959       |             |             |
| <b>Setting (urban/rural)</b>                                     | Rural       |             |             | Peri-urban  |             |             | Rural       |             |             | Rural       |             |             |

\*Annual client load taken from health facility assessments conducted for the Integra Initiative in 2010. All tables are N (%) unless indicated otherwise.

### Receipt of integrated HIV-MCH services

There was evidence of HIV-MCH integration at all facilities and time points, although the extent of integration (the proportion of visits in which integrated HIV-MCH services were received) varied by facility: specifically, between 9% and 49% in 2009, 2%-22% in 2010 and 10-44% in 2012 (see Table 2). In the short-term, five facilities experienced declines in integration between 2009 and 2010: by seven and 13 percentage points in two intervention facilities; and by 12, 19 and 48 percentage points in three comparison facilities. In the longer-term, integration increased in one intervention site (Facility A, from 9% in 2009 to 17% of visits in 2012) and two comparison facilities (Facility E, from 11% to 37%; and Facility F, from 16% to 44% in 2012, after experiencing an initial drop to 9% in 2010). Meanwhile, integration fell in one intervention site (Facility C, from 33% to 16%) and two comparison facilities (Facility G, from 49% to 27%; Facility H, from 25% to 14%). Two intervention facilities (B and D) experienced no significant change in HIV-MCH integration between 2009 and 2012.

Table 2. Proportion of visits receiving the primary and secondary outcomes, by facility, year and design group

|                                                                                   | Intervention    |                      |                 |                      |                |                       |                |                      |                             |                       |
|-----------------------------------------------------------------------------------|-----------------|----------------------|-----------------|----------------------|----------------|-----------------------|----------------|----------------------|-----------------------------|-----------------------|
|                                                                                   | Facility A      |                      | Facility B      |                      | Facility C     |                       | Facility D     |                      | All intervention facilities |                       |
|                                                                                   | Outcome         | Change from baseline | Outcome         | Change from baseline | Outcome        | Change from baseline  | Outcome        | Change from baseline | Outcome†                    | Change from baseline‡ |
| <b>Outcome 1: Any HIV/STI service plus any MCH service received in same visit</b> |                 |                      |                 |                      |                |                       |                |                      |                             |                       |
| 2009                                                                              | 54/590 (9.2%)   |                      | 83/855 (9.7%)   |                      | 69/211 (32.7%) |                       | 98/753 (13%)   |                      | 16.1%                       |                       |
| 2010                                                                              | 74/475 (15.6%)  | 6.4% (2.4, 10.4)     | 6/263 (2.3%)    | -7.4% (-10.1, -4.7)  | 38/184 (20.7%) | -12% (-20.7, -3.4)    | 73/411 (17.8%) | 4.7% (.3, 9.2)       | 14.1%                       | -0.8% (-19.3, 17.7)   |
| 2012                                                                              | 91/532 (17.1%)  | 8% (4, 11.9)         | 40/408 (9.8%)   | .1% (-3.4, 3.6)      | 38/241 (15.8%) | -16.9% (-24.8, -9.1)  | 78/607 (12.9%) | -2% (-3.8, 3.4)      | 13.9%                       | -8.1% (-27.0, 10.8)   |
| <b>Outcome 2: HIV counselling received</b>                                        |                 |                      |                 |                      |                |                       |                |                      |                             |                       |
| 2009                                                                              | 38/590 (6.4%)   |                      | 38/855 (4.4%)   |                      | 56/211 (26.5%) |                       | 24/753 (3.2%)  |                      | 10.2%                       |                       |
| 2010                                                                              | 72/475 (15.2%)  | 8.7% (4.9, 12.5)     | 20/263 (7.6%)   | 3.2% (-.3, 6.6)      | 30/184 (16.3%) | -10.2% (-18.2, -2.2)  | 54/411 (13.1%) | 10% (6.5, 13.5)      | 13.1%                       | 0.1% (-13.0, 13.2)    |
| 2012                                                                              | 81/532 (15.2%)  | 8.8% (5.1, 12.4)     | 13/408 (3.2%)   | -1.3% (-3.5, .9)     | 21/241 (8.7%)  | -17.8% (-24.8, -10.9) | 53/607 (8.7%)  | 5.5% (3, 8.1)        | 9.0%                        | -11% (-32.6, 10.6)    |
|                                                                                   | Comparison      |                      |                 |                      |                |                       |                |                      |                             |                       |
|                                                                                   | Facility E      |                      | Facility F      |                      | Facility G     |                       | Facility H     |                      | All comparison facilities   |                       |
|                                                                                   | Outcome         | Change from baseline | Outcome         | Change from baseline | Outcome        | Change from baseline  | Outcome        | Change from baseline | Outcome†                    | Change from baseline‡ |
| <b>Outcome 1: Any HIV/STI service plus any MCH service received in same visit</b> |                 |                      |                 |                      |                |                       |                |                      |                             |                       |
| 2009                                                                              | 24/220 (10.9%)  |                      | 52/317 (16.4%)  |                      | 72/146 (49.3%) |                       | 42/169 (24.9%) |                      | 25.4%                       |                       |
| 2010                                                                              | 57/215 (26.5%)  | 15.6% (8.4, 22.8)    | 30/333 (9%)     | -7.4% (-12.5, -2.3)  | 6/170 (3.5%)   | -45.8% (-54.4, -37.2) | 5/35 (14.3%)   | -10.6% (-23.9, 2.7)  | 13.3%                       | -10.8% (-29.2, 7.7)   |
| 2012                                                                              | 141/380 (37.1%) | 26.2% (19.8, 32.6)   | 154/347 (44.4%) | 28% (21.3, 34.6)     | 31/114 (27.2%) | -22.1% (-33.6, -10.6) | 39/287 (13.6%) | -11.3% (-18.9, -3.6) | 30.6%                       | 0.6% (-19.5, 18.2)    |
| <b>Outcome 2: HIV counselling received</b>                                        |                 |                      |                 |                      |                |                       |                |                      |                             |                       |
| 2009                                                                              | 10/220 (4.5%)   |                      | 27/317 (8.5%)   |                      | 44/146 (30.1%) |                       | 24/169 (14.2%) |                      | 14.4%                       |                       |
| 2010                                                                              | 29/215 (13.5%)  | 8.9% (3.6, 14.3)     | 13/333 (3.9%)   | -4.6% (-8.3, -.9)    | 4/170 (2.4%)   | -27.8% (-35.6, -20)   | 3/35 (8.6%)    | -5.6% (-16.3, 5)     | 7.1%                        | -10.1% (-23.1, 3.0)   |
| 2012                                                                              | 114/380 (30%)   | 25.5% (20.1, 30.8)   | 202/347 (58.2%) | 49.7% (43.7, 55.7)   | 18/114 (15.8%) | -14.3% (-24.4, -4.3)  | 18/287 (6.3%)  | -7.9% (-13.9, -2)    | 27.6%                       | 3.4% (-18.2, 25.0)    |

†Unadjusted cluster-level proportions analysed separately at each time point. ‡Change from baseline adjusted for facility size and rural/urban status. All confidence intervals are at 95% confidence level.

### Combinations of HIV/STI and MCH services received

In 2009, at least one client in every facility received each type of HIV-MCH integration investigated; that is, one or more clients received integration of HIV-FP (provision and counselling), HIV-ANC, HIV-PNC (for mother or baby), HIV-cervical screening (HIV-CS), and HIV-child health (HIV-CH). Figure 1 shows the proportion of visits in which each service combination was received at each facility. The most common integration in 2009 was HIV with child health services (up to 33% of all visits in Facility G), followed by HIV-ANC and HIV-FP (counselling or provision). Less frequent was integration of HIV services with PNC (a maximum of 6% of visits in Facility C) or cervical screening (maximum 6% of visits in Facility D).

In 2010, integration of HIV services with the MCH services no longer occurred in every facility. For example, in three facilities there were zero visits in which integration of HIV services and family planning occurred; in one intervention and all comparison facilities there was no integration of HIV services and cervical screening services; and in two comparison sites, there were no cases of HIV-ANC and HIV-PNC integration. Excluding the latter two sites, integration of HIV-ANC was the most common type of integration in 2010. Between 2009 and 2012, HIV integration with FP counselling rose in facilities A, E and F - the same facilities that experienced increases in overall HIV-MCH integration. HIV-FP counselling integration declined in the other facilities, and integration of HIV and PNC services – the focus of the intervention – remained low in all facilities over time.

### **Receipt of HIV counselling**

As a secondary outcome, we hypothesised that HIV counselling would increase in the intervention facilities. Table 2 shows that the proportion of visits in which a client received HIV counselling increased between 2009 and 2012 in two intervention (A,D) and two comparison facilities (E,F), and declined in two intervention sites (Facility C) and two comparison sites (G,H). The absolute numbers of visits that included HIV counselling are presented in Figure 2, which also shows that HIV counselling was more often provided in combination with an MCH service than alone. Specifically, HIV counselling was most often provided together with ANC, FP counselling or child health services (data not shown).

### **Evidence of an intervention effect**

As shown in Table 2 (final column), there was no statistical evidence that integration increased over time in intervention facilities as a group. On average, the intervention facilities provided integrated services in 16 percent of visits in 2009 and 14 percent in both 2010 and 2012. Nor was there statistical evidence that the proportion of visits providing HIV counselling increased in the intervention group (averaging 10% in 2009 and 9% in 2012). In the comparison group, both overall HIV-MCH integration and HIV counselling increased between 2009 and 2012 (by 5 and 13 percentage points) after experiencing a decline in 2010. For these differences, 95% confidence intervals include the null value of zero. Between the intervention and comparison groups, there was no statistical difference in change from baseline levels of HIV-MCH integration or provision of HIV counselling (data not shown).

## DISCUSSION

With what we believe are among the most detailed data on HIV-MCH integration in the public sector in Africa, we have been able to assess the extent to which clients are receiving integrated services, and in which combinations over time. The client flow assessments have shown that HIV/STI services (counselling, testing and treatment) are being integrated with a wide range of MCH services, including family planning, ante-natal care, post-natal care, cervical screening and child health services. This is evidence of the capacity to integrate, in large urban facilities as well as small, rural facilities across Swaziland. It also fills a current gap in evidence – regarding the feasibility of integrating HIV services with infant/child health services, and postnatal/postpartum services. A recent systematic review of integration evaluations identified both models as ‘inadequately studied’ to date.<sup>9</sup>

Nevertheless, integration occurred in a minority of visits and varied considerably across facilities. Furthermore, the level of integration fell in three of the eight facilities between 2009 and 2012. The facility with the highest level of integration in 2009 dropped to the lowest a year later (from 49% to <2%). This may be explained by the existence of an NGO campaign to increase access to ART in the area of that facility during the 2010 assessment, as HIV treatment appears to have displaced almost all other HIV and MCH services. This suggests that integration can be susceptible to vertical programmes or competing priorities, particularly in smaller facilities where the 2010 declines in integration were steepest.

It is also possible that integration declined in settings where clients did not need HIV services with every visit. The CFA did not capture clients’ history or need for such services, and thus we

1  
2  
3 cannot interpret observed changes in their provision. For this reason we were particularly  
4  
5 interested in the provision of HIV counselling, which can be promoted regardless of need for  
6  
7 testing or treatment. HIV counselling rose in two intervention and two comparison facilities. In  
8  
9 the three sites where HIV-MCH integration rose, this appeared to be driven by an increase in  
10  
11 HIV counselling. That HIV counselling was most often provided with an MCH service rather  
12  
13 than alone suggests it has a role to play in scaling up integration, but requires a concerted  
14  
15 effort to sustain its provision.  
16  
17  
18  
19  
20  
21  
22

23 The most common form of integration observed was between HIV services and child health,  
24  
25 followed by ANC and FP. These services may offer the best opportunities for integration with  
26  
27 HIV, given most women attended for child health, ANC and FP services. This is particularly  
28  
29 encouraging in light of a recent review concluding that uptake of PMTCT in sub-Saharan  
30  
31 Africa is inadequate, but improves with an integrated family-centred approach, for example, if  
32  
33 HIV treatment is provided at antenatal clinics.<sup>7</sup>  
34  
35  
36  
37  
38  
39

40 Less common was integration of HIV/STI with PNC or cervical screening, most likely due to the  
41  
42 lower number of clients receiving PNC and cervical screening relative to other services (or  
43  
44 PNC clients may have received HIV/STI testing in recent ANC visits). This suggests that  
45  
46 potential effectiveness of the Integra Initiative – which focuses on HIV-PNC integration in  
47  
48 Swaziland – may be limited until more clients attend for PNC services. And this may require  
49  
50 further investment in equipment and training for PNC (as well as cervical screening, as only  
51  
52 one facility had the capacity to offer immediate cryotherapy) as well as demand creation to  
53  
54 increase service uptake.  
55  
56  
57  
58  
59  
60

1  
2  
3  
4  
5 The formal comparison of integration by study design (intervention versus comparison sites)  
6  
7 showed no statistical difference in HIV-MCH integration over time. Neither was there a  
8  
9 meaningful difference in the receipt of HIV counselling in the intervention group over time.  
10  
11

### 12 13 14 15 16 **Limitations and the challenges of embedding research in 'real-world' settings**

17  
18 The observed changes in levels of integration, and absence of an intervention effect, could be  
19  
20 due to a number of factors which we were unable to account for given the non-randomised  
21  
22 design, as well as challenges implementing the protocol as intended.  
23  
24

25  
26  
27  
28  
29 With regard to design: in a small country with limited number of facilities, intervention sites  
30  
31 could not be matched with similar-sized comparison facilities. This resulted in systematically  
32  
33 different groups, with intervention facilities primarily large and urban, and comparison facilities  
34  
35 mostly small and rural. Given the resulting heterogeneity, and the focus on a facility-specific  
36  
37 outcome in this analysis, we felt it was more informative to compare changes by facility than  
38  
39 study design. The wide variation we observed across facilities likely reflects the different  
40  
41 capacities and infrastructure available to provide integrated services, i.e., facilities can not  
42  
43 follow the same 'blue print' for integration, particularly given the variability in facility size, client  
44  
45 volumes and staffing levels among the eight study facilities. Detailed case studies are  
46  
47 underway to explore the role of facility differences in greater depth, including intervention  
48  
49 dose and quality, as well as contextual information, to enhance interpretation of the levels and  
50  
51 patterns of integration revealed by the client flow assessments.  
52  
53  
54  
55  
56  
57  
58  
59  
60



1  
2  
3 Some observed changes may also be due to 'seasonal' differences in 2009 and 2010.  
4  
5 Coordinating client flow assessments across eight facilities proved logistically challenging and  
6  
7 synchronicity was not always achieved as intended. In 2010, most assessments were delayed  
8  
9 until the week before Christmas (as compared to November 2009) which may account for the  
10  
11 smaller number of clients in most facilities in 2010. This timing may have affected the range of  
12  
13 services provided and may account for different patterns of integration. Smaller, rural facilities  
14  
15 – where the drops in integration were the steepest - may be impacted more than large, rural  
16  
17 sites during such holiday periods.  
18  
19  
20  
21  
22  
23  
24

25 It is also possible that provision of HIV and MCH services may fluctuate frequently or  
26  
27 periodically, in patterns we could not detect from 5-day 'snapshot' assessments (regardless of  
28  
29 their specific timing). An early evaluation of CDC's 'patient flow analysis' method, conducted  
30  
31 over one day in family planning clinics in Kenya, concluded that: "the 'typical' clinic day does  
32  
33 not really exist. The client/patient load and staffing patterns are likely to vary according to  
34  
35 many factors: by day of the week, or season of the year, staff vacation or sickness, etc."<sup>14</sup>  
36  
37 Assessments were extended to five days in this study, yet, neither does the 'typical' clinic week  
38  
39 exist. It may be more informative to monitor over a longer period, for more representative  
40  
41 data. However, the 5-day assessments proved challenging and resource-intensive to  
42  
43 implement, and longer versions may be prohibitive in many settings. Previous evaluations of  
44  
45 patient flow analyses also note that data may not be representative since staff – aware of the  
46  
47 assessment – may try to perform at their best.<sup>14</sup> For these reasons, strengthening routine data  
48  
49 collection systems may be preferable, but many existing systems record services individually in  
50  
51  
52  
53  
54  
55  
56  
57  
58  
59  
60

1  
2  
3 separate registers, and are thus unable to document service integration without fundamentally  
4  
5 changing the system. It was this barrier that led us to utilise the client flow assessment.  
6  
7  
8  
9

## 10 **Conclusions**

11  
12  
13  
14 The client flow assessment provided rich detail about the range and combinations of services  
15  
16 received by large number of clients. This was valuable for understanding whether and how HIV  
17  
18 and MCH services are integrated in practice. The data confirm that, in a context of high HIV  
19  
20 prevalence, capacity exists in public sector services for integration of HIV services into MCH  
21  
22 care. In particular, ANC, child health and family planning provide promising entry-points for  
23  
24 reaching the largest number of women. Sustaining HIV-MCH integration may require  
25  
26 concerted effort over time. The study limitations reflect the challenges of embedding rigorous  
27  
28 research into existing and diverse facilities (i.e., 'real-world' evaluations), and difficulties in  
29  
30 recording the provision of integrated services.  
31  
32  
33  
34  
35  
36  
37  
38  
39  
40  
41  
42  
43  
44  
45  
46  
47  
48  
49  
50  
51  
52  
53  
54  
55  
56  
57  
58  
59  
60

## Acknowledgements

The authors are grateful to the clients and the Integra fieldwork team for collecting and managing the data used in this analysis. We also acknowledge the support of the Ministry of Health and facility managers and providers for supporting and facilitating the client flow assessments.

## Author contributions

SM, JK, CW, KC, RN helped to design the data collection. JK managed the data collection. JF and WZ cleaned and managed the datasets. IB and JF led the analysis. All authors provided input into the data interpretation. IB drafted the manuscript. All authors read and commented on a complete draft.

## Data sharing

The dataset will be made available via an LSHTM repository upon completion of the Integra Initiative.

## Competing interests statement

The authors have declared that no competing interests exist.

## Funding statement

This work was supported by the Bill and Melinda Gates Foundation. No funding bodies had any role in study design, data collection and analysis, decision to publish, or preparation of the manuscript.

## REFERENCE LIST

1. McIntyre J. Mothers infected with HIV. *Br Med Bull.* 2003;67:127-35
2. PLoS Medicine Editors, . HIV in maternal and child health: concurrent crises demand cooperation. *PLoS Med.* 2010 Jul;7(7):e1000311
3. Abdool-Karim Q, Abouzahr C, Dehne K, Mangiaterra V, Moodley J, Rollins N, et al. HIV and maternal mortality: turning the tide. *Lancet.* 2010 Jun 5;375(9730):1948-9
4. Kingdom of Swaziland. Swaziland Country Report on Monitoring the Political Declaration on HIV and AIDS. Kingdom of Swaziland: 2012.
5. United Nations. Programme of Action of the United Nations International Conference on Population and Development Cairo: 1995.
6. WHO, UNAIDS, IPPF, UNFPA Linking Sexual and Reproductive Health and HIV/AIDS. Geneva: 2005.
7. Wettstein C, Mugglin C, Egger M, Blaser N, Salazar L, Estill J, et al. Missed Opportunities to Prevent Mother-to-Child-Transmission in sub-Saharan Africa: Systematic Review and Meta-Analysis. *Aids.* 2012 Aug 31
8. Church K, Mayhew SH. Integration of STI and HIV prevention, care, and treatment into family planning services: a review of the literature. *Stud Fam Plann.* 2009 Sep;40(3):171-86
9. Lindegren ML, Kennedy CE, Bain-Brickley D, Azman H, Creanga AA, Butler LM, et al. Integration of HIV/AIDS services with maternal, neonatal and child health, nutrition, and family planning services. *Cochrane Database Syst Rev.* 2012;9:CD010119
10. Warren CE, Mayhew SH, Vassall A, Kimani JK, Church K, Obure CD, et al. Study protocol for the Integra Initiative to assess the benefits and costs of integrating sexual and reproductive health and HIV services in Kenya and Swaziland. *BMC Public Health.* 2012;12:973
11. Warren C, Shongwe R, Waligo A, Mahdi M, Mazia G, Narayanan I. Repositioning Postnatal Care in a High HIV Environment: Swaziland. 2008.
12. Population Council. The Balanced Counseling Strategy Plus: A toolkit for family planning service providers working in High HIV/STI prevalence settings  
[http://www.popcouncil.org/publications/books/2012\\_BalancedCounselingStrategyPLUS.asp2012](http://www.popcouncil.org/publications/books/2012_BalancedCounselingStrategyPLUS.asp2012).
13. Centers for Disease Control and Prevention. Available from:  
[http://www.cdc.gov/reproductivehealth/ProductsPubs/PFA\\_support/](http://www.cdc.gov/reproductivehealth/ProductsPubs/PFA_support/).
14. Lynam PF, Smith T, Dwyer J. Client flow analysis: a practical management technique for outpatient clinic settings. *International Journal for Quality in Health Care* 1994;6(2):179-86
15. Potisek NM, Malone RM, Shilliday BB, Ives TJ, Chelminski PR, DeWalt DA, et al. Use of patient flow analysis to improve patient visit efficiency by decreasing wait time in a primary care-based disease management programs for anticoagulation and chronic pain: A quality improvement study.

**Title**

Integration of HIV and maternal health care in a high HIV-prevalence setting: Analysis of client flow data over time in Swaziland

**Authors and Affiliations**

Isolde J Birdthistle<sup>a</sup>, Susannah Mayhew<sup>b</sup>, Joshua Kikvi<sup>b,c</sup>, Weiwei Zhou<sup>b</sup>, Kathryn Church<sup>b</sup>, Charlotte Warren<sup>c</sup>, Rejoice Nkambule<sup>d</sup>, Justin Fenty<sup>b</sup> on behalf of the Integra Initiative

<sup>a</sup> Department of Population Health, London School of Hygiene & Tropical Medicine, London, UK

<sup>b</sup> Department of Global Health and Development, London School of Hygiene & Tropical Medicine, London, UK

<sup>c</sup> Population Council, Kenya

<sup>d</sup> Ministry of Health, Government of the Kingdom of Swaziland

**Corresponding author:**

Isolde J Birdthistle

Department of Population Health

Faculty of Epidemiology and Population Health

London School of Hygiene & Tropical Medicine

Room 145, Keppel Street, London, WC1E 7HT

E-mail: [Isolde.Birdthistle@lshtm.ac.uk](mailto:Isolde.Birdthistle@lshtm.ac.uk) Tel: +44 (0)20 7612 7889 Fax: +44 (0)20 7436 5389

**Word count:** 3190

## ABSTRACT

### Objective

Maternal and child health (MCH) care may provide an entry point for HIV services in high HIV-prevalence settings. Our objective was to assess integration of HIV with MCH services in public sector facilities in Swaziland.

### Design

In 2009, 2010 and 2012, client flow assessments were conducted over five days in the MCH units of eight government facilities, purposively selected as intervention or comparison sites.

### Participants

8263 MCH visits with female clients were tracked: 3261 in 2009; 2086 in 2010; and 2916 in 2012.

### Intervention

Activities and resources to strengthen integration of HIV services into post-natal care, 2009 - 2010.

### Main outcome measures

- (1) The proportion of all visits in which an HIV/STI testing, counselling or treatment was received together with an MCH service;
- (2) The proportion of all visits in which a client receives HIV counselling.

## Results

Across facilities, the proportion of visits in which both HIV/STI and MCH services were received varied considerably, e.g., from 9%-49% in 2009. HIV/STI services were integrated most frequently with child health, ante-natal care (ANC) and family planning – the most common reasons for women’s attendance – and least often with post-natal care (PNC) and cervical screening. There was no meaningful difference in integration over time by design group, and considerable heterogeneity across facilities. Receipt of integrated services increased in one intervention and two comparison facilities, where HIV counseling also rose, and fell in one intervention and two comparison facilities.

## Conclusions

Provision of HIV/STI services with MCH care occurred at all facilities, yet relatively few women receive integrated services. Increases in integration were driven by increases in HIV counseling while sharp declines in some facilities indicate integration is difficult to sustain. Opportunities for intensifying HIV integration lie with ANC, child health and family planning, while HIV-PNC integration will remain limited until more women attend PNC.

## Trial registry and number

Current Controlled Trials NCT01694862

## ARTICLE SUMMARY

### Article focus

- Maternal health care may provide an entry point for HIV services in high HIV-prevalence settings, yet little is known about actual integration of HIV with maternal care – or how integrated provision can be improved – in public sector facilities.
- Client flow assessments were conducted over five days in MCH units of eight facilities in Swaziland in 2009, 2010 and 2012 (N=8263 visits tracked) to determine the extent to which HIV/STI services were received with MCH services in the same visit, and in what combinations.
- We also assessed whether these outcomes improved with time in facilities which received an intervention designed to strengthen integration of HIV into post-natal care services (the Integra Initiative).

### Key messages

- Some provision of HIV/STI services with MCH care occurred at all facilities, indicating a capacity to integrate services in the public sector, yet relatively few women receive integrated services.
- In three facilities, increases in integration over time were driven by increases in HIV counselling. Sharp declines in other facilities suggest integration is difficult to sustain, given frequent staff rotation and vertical HIV treatment campaigns that can divert resources for integration.



- 1  
2  
3  
4  
5  
6  
7  
8  
9  
10  
11  
12
- There was no evidence of an increase in integration in three of four intervention facilities. Impact of the intervention to strengthen integration of HIV into PNC will remain limited until more women attend PNC; the best opportunities for scaling up HIV integration may lie with ANC, child health and family planning, given their frequent use.

### 13 14 **Strengths and limitations of this study**

- 15  
16  
17  
18  
19  
20  
21  
22  
23  
24  
25  
26  
27  
28  
29  
30  
31  
32  
33  
34  
35  
36  
37  
38  
39  
40  
41  
42  
43  
44  
45  
46  
47  
48  
49  
50  
51  
52  
53  
54  
55  
56  
57  
58  
59  
60
- The main strength is the scale and novelty of client flow data in public sector facilities in sub-Saharan Africa, offering detailed combinations of services received in every consultation. Such detail is typically unavailable from routine health information systems.
  - An important limitation is the logistical challenge in conducting client flow assessments simultaneously across eight government facilities, affecting comparability of data across facilities and time points.

## INTRODUCTION

Maternal mortality and HIV have been described as “intersecting epidemics” which must be simultaneously tackled.<sup>1, 2</sup> In the setting for this study – Swaziland, where more than 40% of pregnant women are infected with HIV – HIV is intimately linked with maternal mortality and hindering efforts to lower maternal death rates.<sup>3, 4</sup>

Since the International Conference on Population and Development in 1994, a strong case has been made for integrating HIV services into sexual and reproductive health (SRH) with potential benefits for both clients and facilities.<sup>5, 6</sup> Integration can simultaneously address clients’ reproductive health goals and their needs for HIV prevention and treatment and PMTCT.<sup>7</sup> Process evaluations of integrated HIV and family planning (FP) services indicate that facilities can gain by increasing the provision, uptake and efficiency of services while improving client satisfaction and reducing HIV-related stigma in clinics.<sup>8</sup>

More recently, the case for expanding integration of HIV/AIDS services to maternal, neonatal, child health and nutrition, including family planning, is supported in a systematic review which concludes that integration of such services is feasible to implement under certain circumstances.<sup>9</sup> Furthermore, such integration can yield positive effects on the quality of services as well as client outcomes including contraceptive use, antiretroviral therapy in pregnancy, and HIV testing.<sup>9</sup>

Maternal and child health services can thus serve as entry points for HIV prevention, treatment and care, particularly in contexts of high HIV prevalence. Yet little is known about existing

1  
2  
3 levels of integration, particularly in public sector health facilities, or how provision can be  
4  
5 improved and scaled up.<sup>8</sup>  
6  
7

8  
9 The Integra Initiative ~~is a large-scale non-randomised evaluation was~~ designed to [assess](#)  
10 [evaluate](#) different models of SRH-HIV integration, including the integration of HIV/STI services  
11 with post-natal care (PNC) in Swaziland.<sup>10</sup> ~~Although not a randomised controlled trial, Integra~~  
12 ~~was registered for good practice and transparency (Current Controlled Trials NCT01694862).~~  
13 ~~The specific models of integration – including the use of post-natal care as an entry point for~~  
14 ~~HIV/STI services in Swaziland – and their hypothesised benefits for clients and health care~~  
15 ~~efficiency are detailed in the Integra study protocol.~~<sup>10</sup>  
16  
17  
18  
19  
20  
21  
22  
23  
24  
25

26 As part of the Integra Initiative, this study analysed client flow data collected in eight public  
27 sector facilities in Swaziland in 2009, 2010 and 2012, to determine whether clients seeking  
28 maternal and child health services (MCH) receive integrated services, and if so, in what  
29 combinations of HIV/STI and MCH services.<sup>10</sup> We also sought to understand how the receipt  
30 of integrated services differs over time and between facilities which did and did not receive the  
31 Integra intervention. We hoped the answers would help identify gaps and opportunities for  
32 integrating HIV within maternal health services and achieving universal access to both.  
33  
34  
35  
36  
37  
38  
39  
40  
41  
42  
43  
44  
45

## 46 METHODS

### 47 Data Collection

48  
49 As part of Integra's non-randomised design, eight public sector facilities were selected from  
50 three of Swaziland's four regions. Four facilities were purposively designated as Intervention  
51 facilities (referred to as Facilities A-D), based on their previous participation in an operations  
52  
53  
54  
55  
56  
57  
58  
59  
60

1  
2  
3 research study by Population Council, one of the Integra institutional partners.<sup>11</sup> Four  
4  
5 comparison facilities were selected based on their distance from intervention sites (to avoid  
6  
7 contamination) and no current provision of integrated HIV-PNC services (Facilities E-H), as  
8  
9 determined by discussions with the Ministry of Health and site visits by Population Council.  
10  
11

12  
13  
14  
15  
16 In the intervention facilities, between October 2009 and December 2010, Integra delivered a  
17  
18 programme designed to strengthen and maintain the provision of integrated HIV and PNC  
19  
20 services. The intervention components included: (a) a training package to facilitate mentoring  
21  
22 of front-line health providers by more experienced providers; (b) job aids to promote  
23  
24 integration, including the Balanced Counselling Strategy Plus (BCS+) toolkit containing an  
25  
26 algorithm, counselling cards and brochures to support counselling, including HIV service  
27  
28 provision, within PNC consultations;<sup>11, 12</sup> and (c) ongoing support to discuss role clarification,  
29  
30 organisational change, referral/linkages and management of service statistics.  
31  
32  
33  
34  
35  
36  
37

38 The client flow assessments (CFAs) comprise one data component of the Integra evaluation.  
39  
40 The CFAs were modelled on the Patient Flow Analysis, a method developed by the Centers for  
41  
42 Disease Control in the 1970s to track patients' movements through a clinic over one day,<sup>13, 14</sup>  
43  
44 and shown to be effective in measuring intervention effectiveness within the context of usual  
45  
46 practice.<sup>15</sup> ~~and~~ In this context, CFAs were designed to capture service utilisation patterns  
47  
48 among clients seeking MCH services, given that data on integrated service provision were not  
49  
50 available from routine clinical data (which collect data on different services in separate  
51  
52 registers). Specifically, CFAs were conducted in all study facilities in November 2009, December  
53  
54 2010, and August 2012. Over a period of five days, Monday through Friday, all clients entering  
55  
56  
57  
58  
59  
60

1  
2  
3 the facility for MCH health services were given a client flow form by teams of trained local  
4  
5 researchers or service providers. Clients carried the form throughout their visit, and each  
6  
7 service provider they saw completed the form in their consultation room/cubicle, indicating  
8  
9 session start/end times, the service(s) received by the client and any referrals to other  
10  
11 providers.  
12  
13

14  
15  
16  
17  
18 The first CFA (late November 2009) was conducted soon after the intervention began in  
19  
20 October 2009, but before it was fully implemented in any site. [For logistical reasons, the client](#)  
21  
22 [flow assessments could not be conducted in the same week of each year. And specific](#)  
23  
24 [circumstances in some facilities meant the assessments could not be simultaneous in all eight](#)  
25  
26 [sites, as the protocol had intended.](#)  
27  
28  
29  
30

### 31 **Data analysis**

32  
33  
34 We defined our unit of analysis to be a visit, which comprised all providers seen and services  
35  
36 received in the same day for each client, as captured on the client assessment form. Clients  
37  
38 were either a single adult or an adult plus a child. We excluded visits of males aged 12 years or  
39  
40 over, to focus on maternal and child health services. The age of 12 was selected as  
41  
42 reproductive health services were received by females as young as 12.  
43  
44  
45  
46

47 The following primary and secondary outcomes were calculated for each facility and time  
48  
49 point:  
50  
51

- 52  
53 1. Receipt of integrated HIV-MCH services: the proportion of all visits in which a client  
54  
55 receives any HIV or STI service, specifically: HIV testing, counselling or treatment;  
56  
57 PMTCT; or STI counselling or testing  
58  
59  
60

1  
2  
3 *and*  
4  
5

6 any of the following MCH services: FP counselling or provision; PNC for mother or  
7  
8 baby; cervical cancer screening; child health (including weighing and immunisations);  
9  
10 and antenatal care (ANC).  
11

12  
13  
14 We hypothesised that HIV-MCH integration would increase in facilities which received  
15  
16 the Integra intervention.  
17

- 18  
19 2. Receipt of HIV counselling: the proportion of all visits in which a client receives HIV  
20  
21 counselling.  
22

23  
24 We hypothesised that HIV counselling would increase as a result of the Integra  
25  
26 intervention, regardless of women's need for HIV testing or treatment which are not  
27  
28 constant (medical histories, including the need for testing or treatment, were not  
29  
30 captured on the CFA form).  
31  
32  
33

34  
35 We also sought to describe which MCH services were most commonly combined with HIV/STI  
36  
37 services, by calculating the percentage of visits in which an HIV/STI service was combined with  
38  
39 each type of MCH service. We examined the change over time in the proportion of visits  
40  
41 receiving integrated HIV/STI and MCH services (primary outcome) and HIV counselling  
42  
43 (secondary outcome) separately for each facility. We used the 95% confidence interval around  
44  
45 the difference (in the 2010 and 2012 proportions compared to 2009) as an indication of  
46  
47 whether the observed change was due to chance (if it included the null value of zero).  
48  
49  
50

51  
52 To examine differences in the key outcomes by design group, we calculated the risk difference  
53  
54 in 2010 and 2012 (each compared to 2009) for intervention versus comparison facilities for  
55  
56 both the primary and secondary outcomes using a two-stage approach. In the first stage we  
57  
58  
59  
60

1  
2  
3 estimated facility-level residuals by fitting a logistic regression model and including terms to  
4  
5 adjust for baseline value (corresponding proportion of visits in 2009), average annual client  
6  
7 load (<10000, 10000+), and rural/urban status. Difference residuals were then obtained as the  
8  
9 difference between the observed and predicted values (divided by facility size). In the second  
10  
11 stage we analysed the facility-level residuals, based on the assumption that in the absence of  
12  
13 any intervention effect the residuals should be distributed normally with no systematic  
14  
15 difference between the intervention and comparison arms. Difference residuals were analysed  
16  
17 using linear regression including an interaction term representing the difference in 'change  
18  
19 from baseline' between the design groups.  
20  
21  
22  
23  
24  
25

## 26 **Ethics Statement**

27  
28  
29 Ethics approval for the client flow assessments was obtained from the Swaziland Scientific  
30  
31 Review Board, the London School of Hygiene & Tropical Medicine and the Population Council  
32  
33 Institutional Review Board.  
34  
35  
36  
37  
38  
39

## 40 **RESULTS**

41  
42  
43 Across eight facilities, 3261 visits were tracked in November 2009, 2086 visits in December  
44  
45 2010, and 2916 in August 2012. Table 1 presents general characteristics of the visits and  
46  
47 facilities. [Additional details about each facility are provided in Supplementary Table 1.](#) Overall,  
48  
49 about half of the visits included an adult female and child (under 12 years), versus an adult  
50  
51 client only, although this proportion varied across facilities (range: 28%-95%). In almost all  
52  
53 facilities, clients received on average more than one service during their visit, with many  
54  
55 receiving two or more. Each year, approximately eight percent of clients did not receive any  
56  
57  
58  
59  
60

1  
2  
3 service or referral during their visit, with the highest proportions in the facilities with highest  
4  
5 client load (e.g., 18% of clients in Facility B and 31% in Facility D in 2010). In all facilities, and in  
6  
7 both years, child health services were either the first or second most common service received.  
8  
9 Family planning counselling or provision, and ante-natal care, were among the top three  
10  
11 services for most facilities. Across facilities, the least common services received were post-natal  
12  
13 care and cervical screening (See Supplementary Table [24](#)).  
14  
15  
16  
17  
18  
19  
20  
21  
22  
23  
24  
25  
26  
27  
28  
29  
30  
31  
32  
33  
34  
35  
36  
37  
38  
39  
40  
41  
42  
43  
44  
45  
46  
47  
48  
49  
50  
51  
52  
53  
54  
55  
56  
57  
58  
59  
60



Table 1. Characteristics of the facilities, visits and services tracked in 2009, 2010 and 2012

| Intervention                                                     | Facility A  |             |             | Facility B  |             |             | Facility C  |             |             | Facility D  |             |             |
|------------------------------------------------------------------|-------------|-------------|-------------|-------------|-------------|-------------|-------------|-------------|-------------|-------------|-------------|-------------|
|                                                                  | 2009        | 2010        | 2012        | 2009        | 2010        | 2012        | 2009        | 2010        | 2012        | 2009        | 2010        | 2012        |
| <b>Visits tracked</b>                                            | 590         | 475         | 532         | 855         | 263         | 408         | 211         | 184         | 241         | 753         | 411         | 607         |
| <b>Client category</b>                                           |             |             |             |             |             |             |             |             |             |             |             |             |
| Adult (12+ years) only                                           | 395 (66.9%) | 196 (41.3%) | 211 (39.7%) | 443 (51.8%) | 153 (58.2%) | 172 (42.2%) | 144 (68.2%) | 87 (47.3%)  | 82 (34%)    | 310 (41.2%) | 197 (47.9%) | 408 (67.2%) |
| Adult + child                                                    | 176 (29.8%) | 278 (58.5%) | 320 (60.2%) | 153 (17.9%) | 109 (41.4%) | 236 (57.8%) | 64 (30.3%)  | 97 (52.7%)  | 156 (64.7%) | 93 (12.4%)  | 213 (51.8%) | 198 (32.6%) |
| <b>Adult age</b>                                                 |             |             |             |             |             |             |             |             |             |             |             |             |
| Mean [sd]                                                        | 26.2 [6.4]  | 26.2 [7.2]  | 26.3 [6.5]  | 26.8 [8.2]  | 27 [7.2]    | 26.6 [7.3]  | 28.5 [8.4]  | 26.8 [8]    | 27.7 [8.5]  | 27.6 [7.4]  | 27.3 [8.4]  | 31.3 [10.2] |
| Missing                                                          | 9 (1.5%)    | 258 (54.3%) | 17 (3.2%)   | 357 (41.8%) | 40 (15.2%)  | 13 (3.2%)   | 2 (.9%)     | 2 (1.1%)    | 1 (.4%)     | 382 (50.7%) | 165 (40.1%) | 12 (2%)     |
| <b>Services received per visit</b>                               |             |             |             |             |             |             |             |             |             |             |             |             |
| None                                                             | 37 (6.3%)   | 24 (5.1%)   | 88 (16.5%)  | 134 (15.7%) | 47 (17.9%)  | 23 (5.6%)   | 11 (5.2%)   | 6 (3.3%)    | 32 (13.3%)  | 93 (12.4%)  | 129 (31.4%) | 29 (4.8%)   |
| One                                                              | 319 (54.1%) | 106 (22.3%) | 192 (36.1%) | 479 (56%)   | 145 (55.1%) | 208 (51%)   | 47 (22.3%)  | 57 (31%)    | 114 (47.3%) | 246 (32.7%) | 135 (32.8%) | 238 (39.2%) |
| Two or more                                                      | 234 (39.7%) | 345 (72.6%) | 252 (47.4%) | 242 (28.3%) | 71 (27%)    | 177 (43.4%) | 153 (72.5%) | 121 (65.8%) | 95 (39.4%)  | 414 (55%)   | 147 (35.8%) | 340 (56%)   |
| <b>Visits where ≥1 service received</b>                          |             |             |             |             |             |             |             |             |             |             |             |             |
| Mean [sd] services received                                      | 1.8 [1.3]   | 2.5 [1.4]   | 2.6 [2]     | 1.6 [1.1]   | 1.4 [0.8]   | 2 [1.6]     | 2.6 [1.7]   | 2 [1]       | 1.9 [1.3]   | 2.1 [1.2]   | 2 [1.3]     | 2 [1.3]     |
| Mean [sd] providers seen                                         | 1.3 [0.5]   | 1.5 [0.5]   | 1.6 [0.9]   | 1.2 [0.4]   | 1 [0.2]     | 1.4 [0.7]   | 1.3 [0.5]   | 1.1 [0.4]   | 1.3 [0.5]   | 1.5 [0.7]   | 1.5 [0.7]   | 1.1 [0.3]   |
| <b>Visits where no services were either referred or received</b> | 36 (6.1%)   | 22 (4.6%)   | 88 (16.5%)  | 112 (13.1%) | 47 (17.9%)  | 15 (3.7%)   | 7 (3.3%)    | 6 (3.3%)    | 16 (6.6%)   | 81 (10.8%)  | 69 (16.8%)  | 29 (4.8%)   |
| <b>Average annual client load*</b>                               | 32,321      |             |             | 65,794      |             |             | 9,974       |             |             | 40,485      |             |             |
| <b>Setting (urban/rural)</b>                                     | Urban       |             |             | Urban       |             |             | Peri-urban  |             |             | Urban       |             |             |
| Comparison                                                       | Facility E  |             |             | Facility F  |             |             | Facility G  |             |             | Facility H  |             |             |
|                                                                  | 2009        | 2010        | 2012        | 2009        | 2010        | 2012        | 2009        | 2010        | 2012        | 2009        | 2010        | 2012        |
| <b>Visits tracked</b>                                            | 220         | 215         | 380         | 317         | 333         | 347         | 146         | 170         | 114         | 169         | 35          | 287         |
| <b>Client category</b>                                           |             |             |             |             |             |             |             |             |             |             |             |             |
| Adult (12+ years) only                                           | 131 (59.5%) | 72 (33.5%)  | 234 (61.6%) | 194 (61.2%) | 183 (55%)   | 154 (44.4%) | 74 (50.7%)  | 106 (62.4%) | 47 (41.2%)  | 110 (65.1%) | 2 (5.7%)    | 178 (62%)   |
| Adult + child                                                    | 78 (35.5%)  | 143 (66.5%) | 145 (38.2%) | 117 (36.9%) | 150 (45%)   | 193 (55.6%) | 69 (47.3%)  | 64 (37.6%)  | 67 (58.8%)  | 48 (28.4%)  | 33 (94.3%)  | 107 (37.3%) |
| <b>Adult age</b>                                                 |             |             |             |             |             |             |             |             |             |             |             |             |
| Mean [sd]                                                        | 26 [7.5]    | 26 [5.9]    | 34.5 [12.6] | 26.1 [6.2]  | 26.4 [6.3]  | 26.5 [7.4]  | 27.4 [7.8]  | 31.4 [10.8] | 26.5 [7.2]  | 25.1 [6]    | 29.5 [10.6] | 30.9 [11.9] |
| Missing                                                          | 1 (.5%)     | 95 (44.2%)  | 53 (13.9%)  | 5 (1.6%)    | 124 (37.2%) | 9 (2.6%)    | 0 (0%)      | 6 (3.5%)    | 5 (4.4%)    | 0 (0%)      | 33 (94.3%)  | 67 (23.3%)  |
| <b>Services received per visit</b>                               |             |             |             |             |             |             |             |             |             |             |             |             |
| None                                                             | 10 (4.5%)   | 3 (1.4%)    | 13 (3.4%)   | 1 (.3%)     | 5 (1.5%)    | 8 (2.3%)    | 11 (7.5%)   | 6 (3.5%)    | 14 (12.3%)  | 31 (18.3%)  | 0 (0%)      | 29 (10.1%)  |
| One                                                              | 99 (45%)    | 34 (15.8%)  | 45 (11.8%)  | 100 (31.5%) | 177 (53.2%) | 46 (13.3%)  | 19 (13%)    | 84 (49.4%)  | 32 (28.1%)  | 32 (18.9%)  | 8 (22.9%)   | 155 (54%)   |
| Two or more                                                      | 111 (50.5%) | 178 (82.8%) | 322 (84.7%) | 216 (68.1%) | 151 (45.3%) | 293 (84.4%) | 116 (79.5%) | 80 (47.1%)  | 68 (59.6%)  | 106 (62.7%) | 27 (77.1%)  | 103 (35.9%) |
| <b>Visits where ≥1 service received</b>                          |             |             |             |             |             |             |             |             |             |             |             |             |
| Mean [sd] services received                                      | 1.8 [1.1]   | 2.4 [1.1]   | 3.2 [1.6]   | 2.3 [1.6]   | 1.6 [0.9]   | 3.4 [1.6]   | 3.2 [1.6]   | 1.6 [0.6]   | 2.6 [1.6]   | 2.7 [1.6]   | 2.8 [1.3]   | 1.8 [1.5]   |
| Mean [sd] providers seen                                         | 1.3 [0.5]   | 1.1 [0.2]   | 1.7 [0.7]   | 1.8 [0.8]   | 1 [0.2]     | 1.3 [0.6]   | 1.5 [0.5]   | 1.4 [0.6]   | 1.3 [0.6]   | 1.4 [0.6]   | 1.1 [0.3]   | 1.2 [0.5]   |
| <b>Visits where no services were either referred or received</b> | 9 (4.1%)    | 2 (.9%)     | 12 (3.2%)   | 1 (.3%)     | 5 (1.5%)    | 7 (2%)      | 11 (7.5%)   | 5 (2.9%)    | 8 (7%)      | 3 (1.8%)    | 0 (0%)      | 21 (7.3%)   |
| <b>Average annual client load*</b>                               | 7,736       |             |             | 28,202      |             |             | 9,674       |             |             | 6,959       |             |             |
| <b>Setting (urban/rural)</b>                                     | Rural       |             |             | Peri-urban  |             |             | Rural       |             |             | Rural       |             |             |

\*Annual client load taken from health facility assessments conducted for the Integra Initiative in 2010. All tables are N (%) unless indicated otherwise.

### Receipt of integrated HIV-MCH services

There was evidence of HIV-MCH integration at all facilities and time points, although the extent of integration (the proportion of visits in which integrated HIV-MCH services were received) varied by facility: specifically, between 9% and 49% in 2009, 2%-22% in 2010 and 10-44% in 2012 (see Table 2). In the short-term, five facilities experienced declines in integration between 2009 and 2010: by seven and 13 percentage points in two intervention facilities; and by 12, 19 and 48 percentage points in three comparison facilities. In the longer-term, integration increased in one intervention site (Facility A, from 9% in 2009 to 17% of visits in 2012) and two comparison facilities (Facility E, from 11% to 37%; and Facility F, from 16% to 44% in 2012, after experiencing an initial drop to 9% in 2010). Meanwhile, integration fell in one intervention site (Facility C, from 33% to 16%) and two comparison facilities (Facility G, from 49% to 27%; Facility H, from 25% to 14%). Two intervention facilities (B and D) experienced no significant change in HIV-MCH integration between 2009 and 2012.

Table 2. Proportion of visits receiving the primary and secondary outcomes, by facility, year and design group

|                                                                                   | Intervention    |                      |                 |                      |                |                       |                |                      |                             |                       |
|-----------------------------------------------------------------------------------|-----------------|----------------------|-----------------|----------------------|----------------|-----------------------|----------------|----------------------|-----------------------------|-----------------------|
|                                                                                   | Facility A      |                      | Facility B      |                      | Facility C     |                       | Facility D     |                      | All intervention facilities |                       |
|                                                                                   | Outcome         | Change from baseline | Outcome         | Change from baseline | Outcome        | Change from baseline  | Outcome        | Change from baseline | Outcome†                    | Change from baseline‡ |
| <b>Outcome 1: Any HIV/STI service plus any MCH service received in same visit</b> |                 |                      |                 |                      |                |                       |                |                      |                             |                       |
| 2009                                                                              | 54/590 (9.2%)   |                      | 83/855 (9.7%)   |                      | 69/211 (32.7%) |                       | 98/753 (13%)   |                      | 16.1%                       |                       |
| 2010                                                                              | 74/475 (15.6%)  | 6.4% (2.4, 10.4)     | 6/263 (2.3%)    | -7.4% (-10.1, -4.7)  | 38/184 (20.7%) | -12% (-20.7, -3.4)    | 73/411 (17.8%) | 4.7% (.3, 9.2)       | 14.1%                       | -0.8% (-19.3, 17.7)   |
| 2012                                                                              | 91/532 (17.1%)  | 8% (4, 11.9)         | 40/408 (9.8%)   | .1% (-3.4, 3.6)      | 38/241 (15.8%) | -16.9% (-24.8, -9.1)  | 78/607 (12.9%) | -2% (-3.8, 3.4)      | 13.9%                       | -8.1% (-27.0, 10.8)   |
| <b>Outcome 2: HIV counselling received</b>                                        |                 |                      |                 |                      |                |                       |                |                      |                             |                       |
| 2009                                                                              | 38/590 (6.4%)   |                      | 38/855 (4.4%)   |                      | 56/211 (26.5%) |                       | 24/753 (3.2%)  |                      | 10.2%                       |                       |
| 2010                                                                              | 72/475 (15.2%)  | 8.7% (4.9, 12.5)     | 20/263 (7.6%)   | 3.2% (-.3, 6.6)      | 30/184 (16.3%) | -10.2% (-18.2, -2.2)  | 54/411 (13.1%) | 10% (6.5, 13.5)      | 13.1%                       | 0.1% (-13.0, 13.2)    |
| 2012                                                                              | 81/532 (15.2%)  | 8.8% (5.1, 12.4)     | 13/408 (3.2%)   | -1.3% (-3.5, .9)     | 21/241 (8.7%)  | -17.8% (-24.8, -10.9) | 53/607 (8.7%)  | 5.5% (3, 8.1)        | 9.0%                        | -11% (-32.6, 10.6)    |
|                                                                                   | Comparison      |                      |                 |                      |                |                       |                |                      |                             |                       |
|                                                                                   | Facility E      |                      | Facility F      |                      | Facility G     |                       | Facility H     |                      | All comparison facilities   |                       |
|                                                                                   | Outcome         | Change from baseline | Outcome         | Change from baseline | Outcome        | Change from baseline  | Outcome        | Change from baseline | Outcome†                    | Change from baseline‡ |
| <b>Outcome 1: Any HIV/STI service plus any MCH service received in same visit</b> |                 |                      |                 |                      |                |                       |                |                      |                             |                       |
| 2009                                                                              | 24/220 (10.9%)  |                      | 52/317 (16.4%)  |                      | 72/146 (49.3%) |                       | 42/169 (24.9%) |                      | 25.4%                       |                       |
| 2010                                                                              | 57/215 (26.5%)  | 15.6% (8.4, 22.8)    | 30/333 (9%)     | -7.4% (-12.5, -2.3)  | 6/170 (3.5%)   | -45.8% (-54.4, -37.2) | 5/35 (14.3%)   | -10.6% (-23.9, 2.7)  | 13.3%                       | -10.8% (-29.2, 7.7)   |
| 2012                                                                              | 141/380 (37.1%) | 26.2% (19.8, 32.6)   | 154/347 (44.4%) | 28% (21.3, 34.6)     | 31/114 (27.2%) | -22.1% (-33.6, -10.6) | 39/287 (13.6%) | -11.3% (-18.9, -3.6) | 30.6%                       | 0.6% (-19.5, 18.2)    |
| <b>Outcome 2: HIV counselling received</b>                                        |                 |                      |                 |                      |                |                       |                |                      |                             |                       |
| 2009                                                                              | 10/220 (4.5%)   |                      | 27/317 (8.5%)   |                      | 44/146 (30.1%) |                       | 24/169 (14.2%) |                      | 14.4%                       |                       |
| 2010                                                                              | 29/215 (13.5%)  | 8.9% (3.6, 14.3)     | 13/333 (3.9%)   | -4.6% (-8.3, -.9)    | 4/170 (2.4%)   | -27.8% (-35.6, -20)   | 3/35 (8.6%)    | -5.6% (-16.3, 5)     | 7.1%                        | -10.1% (-23.1, 3.0)   |
| 2012                                                                              | 114/380 (30%)   | 25.5% (20.1, 30.8)   | 202/347 (58.2%) | 49.7% (43.7, 55.7)   | 18/114 (15.8%) | -14.3% (-24.4, -4.3)  | 18/287 (6.3%)  | -7.9% (-13.9, -2)    | 27.6%                       | 3.4% (-18.2, 25.0)    |

†Unadjusted cluster-level proportions analysed separately at each time point. ‡Change from baseline adjusted for facility size and rural/urban status. All confidence intervals are at 95% confidence level.

### Combinations of HIV/STI and MCH services received

In 2009, at least one client in every facility received each type of HIV-MCH integration investigated; that is, one or more clients received integration of HIV-FP (provision and counselling), HIV-ANC, HIV-PNC (for mother or baby), HIV-cervical screening (HIV-CS), and HIV-child health (HIV-CH). Figure 1 shows the proportion of visits in which each service combination was received at each facility. The most common integration in 2009 was HIV with child health services (up to 33% of all visits in Facility G), followed by HIV-ANC and HIV-FP (counselling or provision). Less frequent was integration of HIV services with PNC (a maximum of 6% of visits in Facility C) or cervical screening (maximum 6% of visits in Facility D).

In 2010, integration of HIV services with the MCH services no longer occurred in every facility. For example, in three facilities there were zero visits in which integration of HIV services and family planning occurred; ~~and in one intervention and all comparison facilities there was no~~ integration of HIV services and cervical screening services; ~~and disappeared in one intervention and all comparison facilities, while in two comparison sites, there were no cases of~~ HIV-ANC and HIV-PNC integration ~~disappeared in two comparison sites~~. Excluding the latter two sites, integration of HIV-ANC was the most common type of integration in 2010. Between 2009 and 2012, HIV integration with FP counselling rose in facilities A, E and F - the same facilities that experienced increases in overall HIV-MCH integration. HIV-FP counselling integration declined in the other facilities, and integration of HIV and PNC services – the focus of the intervention – remained low in all facilities over time.

### **Receipt of HIV counselling**

As a secondary outcome, we hypothesised that HIV counselling would increase in the intervention facilities. Table 2 shows that the proportion of visits in which a client received HIV counselling increased between 2009 and 2012 in two intervention (A,D) and two comparison facilities (E,F), and declined in two intervention sites (Facility C) and two comparison sites (G,H). The absolute numbers of visits that included HIV counselling are presented in Figure 2, which also shows that HIV counselling was more often provided in combination with an MCH service than alone. Specifically, HIV counselling was most often provided together with ANC, FP counselling or child health services (data not shown).

### **Evidence of an intervention effect**

As shown in Table 2 (final column), there was no statistical evidence that integration increased over time in intervention facilities as a group. On average, the intervention facilities provided integrated services in 16 percent of visits in 2009 and 14 percent in both 2010 and 2012. Nor was there statistical evidence that the proportion of visits providing HIV counselling increased in the intervention group (averaging 10% in 2009 and 9% in 2012). In the comparison group, both overall HIV-MCH integration and HIV counselling increased between 2009 and 2012 (by 5 and 13 percentage points) after experiencing a decline in 2010. For these differences, 95% confidence intervals include the null value of zero. Between the intervention and comparison groups, there was no statistical difference in change from baseline levels of HIV-MCH integration or provision of HIV counselling (data not shown).

## DISCUSSION

1  
2  
3  
4  
5  
6  
7  
8  
9  
10  
11  
12  
13  
14  
15  
16  
17  
18  
19  
20  
21  
22  
23  
24  
25  
26  
27  
28  
29  
30  
31  
32  
33  
34  
35  
36  
37  
38  
39  
40  
41  
42  
43  
44  
45  
46  
47  
48  
49  
50  
51  
52  
53  
54  
55  
56  
57  
58  
59  
60

With what we believe are among the most detailed data on HIV-MCH integration in the public sector in Africa, we have been able to assess the extent to which clients are receiving integrated services, and in which combinations over time. The client flow assessments have shown that HIV/STI services (counselling, testing and treatment) are being integrated with a wide range of MCH services, including family planning, ante-natal care, post-natal care, cervical screening and child health services. This is evidence of the capacity to integrate, in large urban facilities as well as small, rural facilities across Swaziland. It also fills a current gap in evidence – regarding the feasibility of integrating HIV services with infant/child health services, and postnatal/postpartum services. A recent systematic review of integration evaluations identified both models as ‘inadequately studied’ to date.<sup>9</sup>

Nevertheless, integration occurred in a minority of visits and varied considerably across facilities. Furthermore, the level of integration fell in three of the eight facilities between 2009 and 2012. The facility with the highest level of integration in 2009 dropped to the lowest a year later (from 49% to <2%). This may be explained by the existence of an NGO campaign to increase access to ART in the area of that facility during the 2010 assessment, as HIV treatment appears to have displaced almost all other HIV and MCH services. This suggests that integration can be susceptible to vertical programmes or competing priorities, particularly in smaller facilities where the 2010 declines in integration were steepest.

It is also possible that integration declined in settings where clients did not need HIV services with every visit. The CFA did not capture clients’ history or need for such services, and thus we

1  
2  
3 cannot interpret observed changes in their provision. For this reason we were particularly  
4  
5 interested in the provision of HIV counselling, which can be promoted regardless of need for  
6  
7 testing or treatment. HIV counselling rose in two intervention and two comparison facilities. In  
8  
9 the three sites where HIV-MCH integration rose, this appeared to be driven by an increase in  
10  
11 HIV counselling. That HIV counselling was most often provided with an MCH service rather  
12  
13 than alone suggests it has an ~~important~~ role to play in scaling up integration, but requires a  
14  
15 concerted effort to sustain its provision.  
16  
17  
18  
19  
20  
21  
22

23 The most common form of integration observed was between HIV services and child health,  
24  
25 followed by ANC and FP. These services may offer the best opportunities for integration with  
26  
27 HIV, given most women attended for child health, ANC and FP services. This is particularly  
28  
29 encouraging in light of a recent review concluding that uptake of PMTCT in sub-Saharan  
30  
31 Africa is inadequate, but improves with an integrated family-centred approach, for example, if  
32  
33 HIV treatment is provided at antenatal clinics.<sup>7</sup>  
34  
35  
36  
37  
38  
39

40 Less common was integration of HIV/STI with PNC or cervical screening, most likely due to the  
41  
42 lower number of clients receiving PNC and cervical screening relative to other services (or  
43  
44 PNC clients may have received HIV/STI testing in recent ANC visits). This suggests that  
45  
46 potential effectiveness of the Integra Initiative – which focuses on HIV-PNC integration in  
47  
48 Swaziland – may be limited until more clients attend for PNC services. And this may require  
49  
50 further investment in equipment and training for PNC (as well as cervical screening, as only  
51  
52 one facility had the capacity to offer immediate cryotherapy) as well as demand creation to  
53  
54 increase service uptake.  
55  
56  
57  
58  
59  
60

1  
2  
3  
4  
5 The formal comparison of integration by study design (intervention versus comparison sites)  
6  
7 showed no statistical difference in HIV-MCH integration over time. Neither was there a  
8  
9 meaningful difference in the receipt of HIV counselling in the intervention group over time.  
10  
11  
12  
13

### 14 15 16 **Limitations and the challenges of embedding research in 'real-world' settings**

17  
18 The observed changes in levels of integration, and absence of an intervention effect, could be  
19  
20 due to a number of factors which we were unable to account for given the non-randomised  
21  
22 design, as well as challenges implementing the protocol as intended.  
23  
24  
25  
26  
27  
28

29 With regard to design: in a small country with limited number of facilities, intervention sites  
30  
31 could not be matched with similar-sized comparison facilities ~~without risk of contamination~~.  
32

33 This resulted in systematically different groups, with intervention facilities primarily large and  
34  
35 urban, and comparison facilities mostly small and rural. Given the resulting heterogeneity, [and](#)  
36  
37 [the focus on a facility-specific outcome in this analysis](#), we felt it was more informative to  
38  
39 compare changes by facility than study design. The wide variation we observed across facilities  
40  
41 likely reflects the different capacities and infrastructure available to provide integrated services,  
42  
43 i.e., facilities can not follow the same 'blue print' for integration, [particularly given the](#)  
44  
45 [variability in facility size, client volumes and staffing levels among the eight study facilities](#).  
46  
47

48  
49 [Detailed case studies are underway to explore the role of facility differences in greater depth,](#)  
50  
51 [including intervention dose and quality, as well as contextual information, to enhance](#)  
52  
53 [interpretation of the levels and patterns of integration revealed by the client flow assessments](#).  
54  
55  
56  
57  
58  
59  
60



1  
2  
3 Some observed changes may also be due to 'seasonal' differences in 2009 and 2010.  
4

5 [Coordinating client flow assessments across eight facilities proved logistically challenging and](#)  
6 [synchronicity was not always achieved as intended. For logistical reasons, the client flow](#)  
7 [assessments were delayed in 2010 and could not be conducted in the same week in November](#)  
8 [as in 2009. And specific circumstances in some facilities meant the assessments could not be](#)  
9 [simultaneous in all sites, as the protocol had intended. In 2010, M](#)most assessments were  
10 delayed until the week before Christmas ([as compared to November 2009](#)) which may account  
11 for the smaller number of clients in most facilities in 2010. This timing may have affected the  
12 range of services provided and may account for different patterns of integration. Smaller, rural  
13 facilities – where the drops in integration were the steepest – may be impacted more than  
14 large, rural sites during such holiday periods.  
15  
16  
17  
18  
19  
20  
21  
22  
23  
24  
25  
26  
27  
28  
29  
30  
31

32 It is also possible that provision of HIV and MCH services may fluctuate frequently or  
33 periodically, in patterns we could not detect from 5-day 'snapshot' assessments (regardless of  
34 their specific timing). [An early evaluation of CDC's 'patient flow analysis' method, conducted](#)  
35 [over one day in family planning clinics in Kenya, concluded that: "the 'typical' clinic day does](#)  
36 [not really exist. The client/patient load and staffing patterns are likely to vary according to](#)  
37 [many factors: by day of the week, or season of the year, staff vacation or sickness, etc."](#)<sup>14</sup>  
38 [Assessments were extended to five days in this study, yet, neither does the 'typical' clinic week](#)  
39 [exist.](#) It may be more informative to monitor over a longer period, for more representative  
40 data. [Yet](#) [However](#), the 5-day assessments proved challenging and resource-intensive to  
41 implement, and longer versions may be prohibitive in many settings. [Previous evaluations of](#)  
42 [patient flow analyses also note that data may not be representative since staff – aware of the](#)  
43  
44  
45  
46  
47  
48  
49  
50  
51  
52  
53  
54  
55  
56  
57  
58  
59  
60

1  
2  
3 assessment – may try to perform at their best.<sup>14</sup> For these reasons, –Strengthening routine  
4  
5 data collection systems may be preferable, but many existing systems record services  
6  
7 individually in separate registers, and are thus unable to document service integration without  
8  
9 fundamentally changing the system. It was this barrier that led us to develop-utilise the client  
10  
11 flow assessment.  
12  
13

## 14 15 16 17 18 **Conclusions** 19

20  
21 The client flow assessment provided rich detail about the range and combinations of services  
22  
23 received by large number of clients. This was valuable for understanding whether and how HIV  
24  
25 and MCH services are integrated in practice. The data confirm that, in a context of high HIV  
26  
27 prevalence, capacity exists in public sector services for integration of HIV services into MCH  
28  
29 care. In particular, ANC, child health and family planning provide promising entry-points for  
30  
31 reaching the largest number of women. Sustaining HIV-MCH integration may require  
32  
33 concerted effort over time. The study limitations reflect the challenges of embedding rigorous  
34  
35 research into existing and diverse facilities (i.e., 'real-world' evaluations), and difficulties in  
36  
37 recording the provision of integrated services.  
38  
39  
40  
41  
42  
43  
44  
45  
46  
47  
48  
49  
50  
51  
52  
53  
54  
55  
56  
57  
58  
59  
60

## Acknowledgements

The authors are grateful to the clients and the Integra fieldwork team for collecting and managing the data used in this analysis. We also acknowledge the support of the Ministry of Health and facility managers and providers for supporting and facilitating the client flow assessments.

## Author contributions

SM, JK, CW, KC, RN helped to design the data collection. JK managed the data collection. JF and WZ cleaned and managed the datasets. IB and JF led the analysis. All authors provided input into the data interpretation. IB drafted the manuscript. All authors read and commented on a complete draft.

## Data sharing

The dataset will be made available via an LSHTM repository upon completion of the Integra Initiative.

## Competing interests statement

The authors have declared that no competing interests exist.

## Funding statement

This work was supported by the Bill and Melinda Gates Foundation. No funding bodies had any role in study design, data collection and analysis, decision to publish, or preparation of the manuscript.

## REFERENCE LIST

1. McIntyre J. Mothers infected with HIV. *Br Med Bull.* 2003;67:127-35
2. PLoS Medicine Editors, . HIV in maternal and child health: concurrent crises demand cooperation. *PLoS Med.* 2010 Jul;7(7):e1000311
3. Abdool-Karim Q, Abouzahr C, Dehne K, Mangiaterra V, Moodley J, Rollins N, et al. HIV and maternal mortality: turning the tide. *Lancet.* 2010 Jun 5;375(9730):1948-9
4. Kingdom of Swaziland. Swaziland Country Report on Monitoring the Political Declaration on HIV and AIDS. Kingdom of Swaziland: 2012.
5. United Nations. Programme of Action of the United Nations International Conference on Population and Development Cairo: 1995.
6. WHO, UNAIDS, IPPF, UNFPA Linking Sexual and Reproductive Health and HIV/AIDS. Geneva: 2005.
7. Wettstein C, Mugglin C, Egger M, Blaser N, Salazar L, Estill J, et al. Missed Opportunities to Prevent Mother-to-Child-Transmission in sub-Saharan Africa: Systematic Review and Meta-Analysis. *Aids.* 2012 Aug 31
8. Church K, Mayhew SH. Integration of STI and HIV prevention, care, and treatment into family planning services: a review of the literature. *Stud Fam Plann.* 2009 Sep;40(3):171-86
9. Lindegren ML, Kennedy CE, Bain-Brickley D, Azman H, Creanga AA, Butler LM, et al. Integration of HIV/AIDS services with maternal, neonatal and child health, nutrition, and family planning services. *Cochrane Database Syst Rev.* 2012;9:CD010119
10. Warren CE, Mayhew SH, Vassall A, Kimani JK, Church K, Obure CD, et al. Study protocol for the Integra Initiative to assess the benefits and costs of integrating sexual and reproductive health and HIV services in Kenya and Swaziland. *BMC Public Health.* 2012;12:973
11. Warren C, Shongwe R, Waligo A, Mahdi M, Mazia G, Narayanan I. Repositioning Postnatal Care in a High HIV Environment: Swaziland. 2008.
12. Population Council. The Balanced Counseling Strategy Plus: A toolkit for family planning service providers working in High HIV/STI prevalence settings  
[http://www.popcouncil.org/publications/books/2012\\_BalancedCounselingStrategyPLUS.asp2012](http://www.popcouncil.org/publications/books/2012_BalancedCounselingStrategyPLUS.asp2012).
13. Centers for Disease Control and Prevention. Available from:  
[http://www.cdc.gov/reproductivehealth/ProductsPubs/PFA\\_support/](http://www.cdc.gov/reproductivehealth/ProductsPubs/PFA_support/).
14. Lynam PF, Smith T, Dwyer J. Client flow analysis: a practical management technique for outpatient clinic settings. *International Journal for Quality in Health Care* 1994;6(2):179-86
15. Potisek NM, Malone RM, Shilliday BB, Ives TJ, Chelminski PR, DeWalt DA, et al. Use of patient flow analysis to improve patient visit efficiency by decreasing wait time in a primary care-based disease management programs for anticoagulation and chronic pain: A quality improvement study.

1  
2  
3  
4  
5  
6  
7  
8  
9  
10  
11  
12  
13  
14  
15  
16  
17  
18  
19  
20  
21  
22  
23  
24  
25  
26  
27  
28  
29  
30  
31  
32  
33  
34  
35  
36  
37  
38  
39  
40  
41  
42  
43  
44  
45  
46  
47  
48  
49  
50  
51  
52  
53  
54  
55  
56  
57  
58  
59  
60

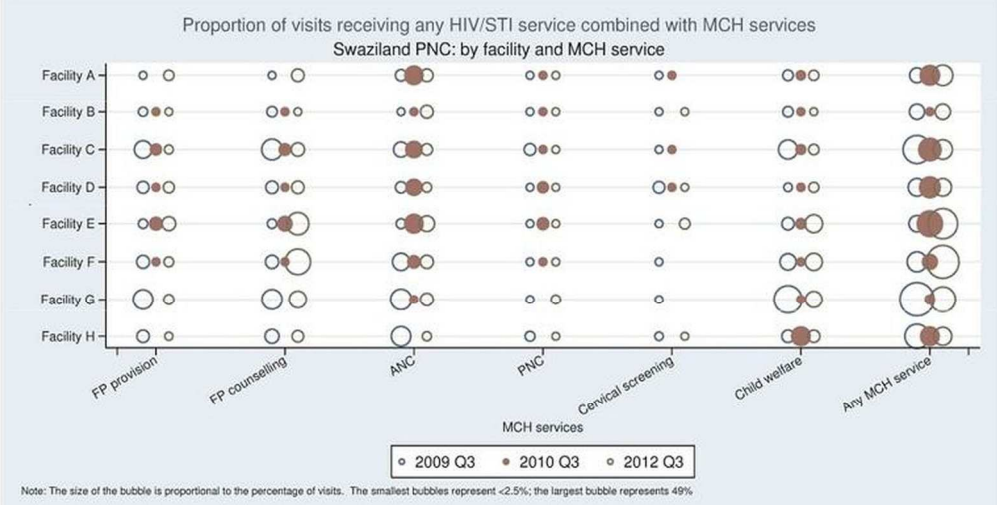

177x90mm (300 x 300 DPI)

For peer review only

1  
2  
3  
4  
5  
6  
7  
8  
9  
10  
11  
12  
13  
14  
15  
16  
17  
18  
19  
20  
21  
22  
23  
24  
25  
26  
27  
28  
29  
30  
31  
32  
33  
34  
35  
36  
37  
38  
39  
40  
41  
42  
43  
44  
45  
46  
47  
48  
49  
50  
51  
52  
53  
54  
55  
56  
57  
58  
59  
60

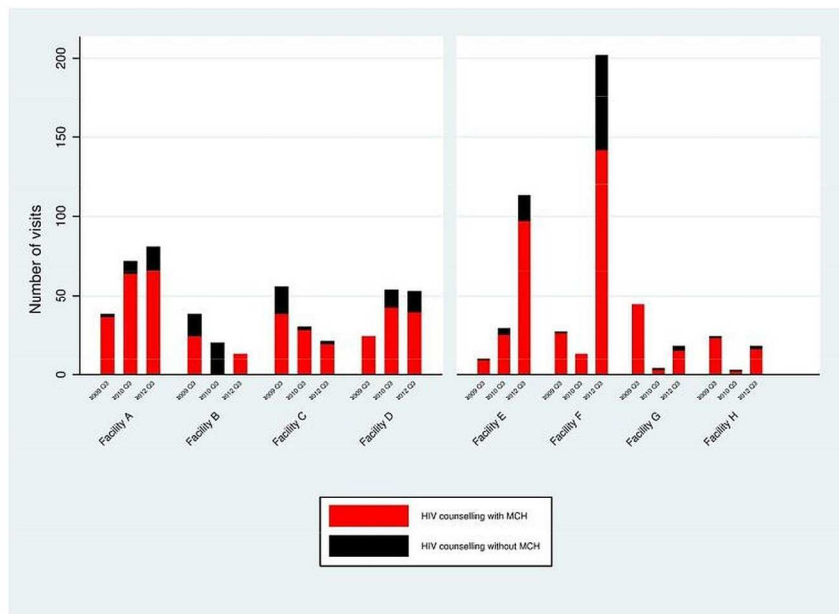

Figure 2. Number of visits receiving any HIV counselling services, by facility and integration with MCH services

Figure 2. Number of visits receiving any HIV counselling services, by facility and integration with MCH services  
128x90mm (300 x 300 DPI)

Supplementary Table 1. Characteristics of the facilities \*

| Intervention                   | Facility A                                                                                                                                                | Facility B                                                                                                                                                                                                                                                                                      | Facility C                                                                                                                                                                         | Facility D                                                                                                                                                                       |
|--------------------------------|-----------------------------------------------------------------------------------------------------------------------------------------------------------|-------------------------------------------------------------------------------------------------------------------------------------------------------------------------------------------------------------------------------------------------------------------------------------------------|------------------------------------------------------------------------------------------------------------------------------------------------------------------------------------|----------------------------------------------------------------------------------------------------------------------------------------------------------------------------------|
| Type of facility               | Public Health Unit                                                                                                                                        | Public Health Unit                                                                                                                                                                                                                                                                              | Hospital                                                                                                                                                                           | Hospital                                                                                                                                                                         |
| Inpatient beds (#)             | 0                                                                                                                                                         | 0                                                                                                                                                                                                                                                                                               | 200                                                                                                                                                                                | 350                                                                                                                                                                              |
| Outpatient visits per year (#) | 44,280                                                                                                                                                    | 43,671                                                                                                                                                                                                                                                                                          | 22,820                                                                                                                                                                             | 219,943                                                                                                                                                                          |
| Staff (#) ^                    |                                                                                                                                                           |                                                                                                                                                                                                                                                                                                 |                                                                                                                                                                                    |                                                                                                                                                                                  |
| Clinical                       | 22                                                                                                                                                        | 20                                                                                                                                                                                                                                                                                              | 43                                                                                                                                                                                 | 214                                                                                                                                                                              |
| Technical                      | 2                                                                                                                                                         | 1                                                                                                                                                                                                                                                                                               | 93                                                                                                                                                                                 | 58                                                                                                                                                                               |
| Admin/management               | 2                                                                                                                                                         | 1                                                                                                                                                                                                                                                                                               | 3                                                                                                                                                                                  | 5                                                                                                                                                                                |
| Services provided              | FP; PNC; STI management; general SRH counselling; Ca Cx screening; PITC; ART clinic; CD4 count (samples drawn in ART unit). ART services since March 2011 | Static services: Tx of opportunistic infections, ART initiation & refills to HIV-positive PNC & ANC clients & families; ANC; FP; PNC; dental services; curatives; Lab services; child welfare clinic; STI management. Outreach clinics provide child welfare, PNC, FP, curatives, STI treatment | FP; PNC; Ca Cx Screening; PMTCT; STI management; General SRH counselling; PITC; VCT; ART clinic; CD4 count (samples drawn in PHU and ART unit); TB screening & treatment (TB unit) | FP; PNC; Ca Cx Screening; PMTCT; STI management; general SRH counselling; PITC; VCT; ART clinic; CD4 count (samples drawn in PHU & ART unit); TB screening & treatment (TB unit) |

  

| Comparison                     | Facility E                                                                                                                                                                                                    | Facility F                                                                                                                                                      | Facility G                                                                                                                                                                         | Facility H                                                                                                                                                      |
|--------------------------------|---------------------------------------------------------------------------------------------------------------------------------------------------------------------------------------------------------------|-----------------------------------------------------------------------------------------------------------------------------------------------------------------|------------------------------------------------------------------------------------------------------------------------------------------------------------------------------------|-----------------------------------------------------------------------------------------------------------------------------------------------------------------|
| Type of facility               | Health Centre                                                                                                                                                                                                 | Health Centre                                                                                                                                                   | Health Centre                                                                                                                                                                      | Health Centre                                                                                                                                                   |
| Inpatient beds (#)             | 35                                                                                                                                                                                                            | 40                                                                                                                                                              | 0                                                                                                                                                                                  | 0                                                                                                                                                               |
| Outpatient visits per year (#) | 12,770                                                                                                                                                                                                        | 63,809                                                                                                                                                          | 25,513                                                                                                                                                                             | 24,062                                                                                                                                                          |
| Staff (#)                      |                                                                                                                                                                                                               |                                                                                                                                                                 |                                                                                                                                                                                    |                                                                                                                                                                 |
| Clinical                       | 33                                                                                                                                                                                                            | 50                                                                                                                                                              | 28                                                                                                                                                                                 | 214                                                                                                                                                             |
| Technical                      | 17                                                                                                                                                                                                            | 23                                                                                                                                                              | 11                                                                                                                                                                                 | 58                                                                                                                                                              |
| Admin/management               | 2                                                                                                                                                                                                             | 27                                                                                                                                                              | 12                                                                                                                                                                                 | 5                                                                                                                                                               |
| Services provided              | FP; PNC; STI management; Maternity/Gynae; General SRH counselling; Ca CX Screening (clients referred); PITC; ART clinic; CD4 count (samples drawn in PHU, ART & TB units); TB screening & treatment (TB unit) | FP; PNC; PMTCT; STI management; general SRH counselling; PITC; VCT; ART clinic; CD4 count (samples drawn in PHU & ART unit); TB screening & treatment (TB unit) | FP; PNC; PMTCT; STI management; general SRH counselling; PITC; ART clinic; VCT (since June 2011; CD4 count (samples drawn in PHU and ART unit); TB screening & treatment (TB unit) | FP; PNC; PMTCT; STI management; general SRH counselling; PITC; VCT; ART clinic; CD4 count (samples drawn in PHU & ART unit); TB screening & treatment (TB unit) |

\*Taken from health facility assessments conducted for the Integra Initiative in 2010

^ Clinical staff include staff nurses, nursing assistants, doctors, dentists, paramedics and medical officers ; Technical staff include radiographers, medical technologists, lab technicians/assistants, phlebotomists, pharmacists, environmental health officers, mentor mothers, expert clients, cough officers, lay counsellors; Administrative staff include managers, senior nurses, matrons, health administrators, data clerks, orderlies.

Supplementary Table 24. Proportion of visits in which key HIV/STI and MCH services were received, by facility and year

| Intervention                      | Facility A  |             |             | Facility B  |             |             | Facility C  |             |             | Facility D  |             |             |
|-----------------------------------|-------------|-------------|-------------|-------------|-------------|-------------|-------------|-------------|-------------|-------------|-------------|-------------|
|                                   | 2009        | 2010        | 2012        | 2009        | 2010        | 2012        | 2009        | 2010        | 2012        | 2009        | 2010        | 2012        |
| <b>N</b>                          | 590         | 475         | 532         | 855         | 263         | 408         | 211         | 184         | 241         | 753         | 411         | 607         |
| <b>HIV/STI services received</b>  |             |             |             |             |             |             |             |             |             |             |             |             |
| HIV testing                       | 40 (6.8%)   | 39 (8.2%)   | 125 (23.5%) | 20 (2.3%)   | 6 (2.3%)    | 14 (3.4%)   | 13 (6.2%)   | 8 (4.3%)    | 15 (6.2%)   | 10 (1.3%)   | 29 (7.1%)   | 33 (5.4%)   |
| HIV counselling                   | 38 (6.4%)   | 72 (15.2%)  | 81 (15.2%)  | 38 (4.4%)   | 20 (7.6%)   | 13 (3.2%)   | 56 (26.5%)  | 30 (16.3%)  | 21 (8.7%)   | 24 (3.2%)   | 54 (13.1%)  | 53 (8.7%)   |
| HIV treatment                     | 4 (.7%)     | 9 (1.9%)    | 14 (2.6%)   | 139 (16.3%) | 21 (8%)     | 70 (17.2%)  | 29 (13.7%)  | 10 (5.4%)   | 108 (44.8%) | 65 (8.6%)   | 1 (.2%)     | 78 (12.9%)  |
| PMTCT                             | 0 (0%)      | 30 (6.3%)   | 27 (5.1%)   | 0 (0%)      | 1 (.4%)     | 24 (5.9%)   | 0 (0%)      | 7 (3.8%)    | 7 (2.9%)    | 0 (0%)      | 71 (17.3%)  | 28 (4.6%)   |
| STI counselling & testing         | 13 (2.2%)   | 0 (0%)      | 49 (9.2%)   | 65 (7.6%)   | 49 (18.6%)  | 9 (2.2%)    | 46 (21.8%)  | 1 (.5%)     | 5 (2.1%)    | 59 (7.8%)   | 5 (1.2%)    | 28 (4.6%)   |
| Any HIV/STI service               | 57 (9.7%)   | 83 (17.5%)  | 202 (38%)   | 218 (25.5%) | 74 (28.1%)  | 109 (26.7%) | 92 (43.6%)  | 47 (25.5%)  | 135 (56%)   | 138 (18.3%) | 87 (21.2%)  | 159 (26.2%) |
| <b>MCH services received</b>      |             |             |             |             |             |             |             |             |             |             |             |             |
| Family planning provision         | 176 (29.8%) | 97 (20.4%)  | 105 (19.7%) | 147 (17.2%) | 38 (14.4%)  | 63 (15.4%)  | 56 (26.5%)  | 46 (25%)    | 18 (7.5%)   | 67 (8.9%)   | 40 (9.7%)   | 100 (16.5%) |
| Family planning counselling       | 65 (11%)    | 44 (9.3%)   | 93 (17.5%)  | 84 (9.8%)   | 9 (3.4%)    | 52 (12.7%)  | 70 (33.2%)  | 19 (10.3%)  | 33 (13.7%)  | 77 (10.2%)  | 40 (9.7%)   | 130 (21.4%) |
| ANC                               | 145 (24.6%) | 74 (15.6%)  | 49 (9.2%)   | 102 (11.9%) | 19 (7.2%)   | 78 (19.1%)  | 49 (23.2%)  | 46 (25%)    | 20 (8.3%)   | 322 (42.8%) | 48 (11.7%)  | 86 (14.2%)  |
| PNC (mother or baby)              | 53 (9%)     | 35 (7.4%)   | 11 (2.1%)   | 32 (3.7%)   | 10 (3.8%)   | 16 (3.9%)   | 16 (7.6%)   | 9 (4.9%)    | 10 (4.1%)   | 54 (7.2%)   | 23 (5.6%)   | 28 (4.6%)   |
| Cervical screen                   | 2 (.3%)     | 1 (.2%)     | 3 (.6%)     | 8 (.9%)     | 0 (0%)      | 2 (.5%)     | 3 (1.4%)    | 1 (.5%)     | 0 (0%)      | 348 (46.2%) | 1 (.2%)     | 11 (1.8%)   |
| Child health (incl. Immunization) | 320 (54.2%) | 277 (58.3%) | 174 (32.7%) | 319 (37.3%) | 90 (34.2%)  | 157 (38.5%) | 93 (44.1%)  | 81 (44%)    | 47 (19.5%)  | 155 (20.6%) | 128 (31.1%) | 268 (44.2%) |
| Other reproductive health service | 1 (.2%)     | 0 (0%)      | 1 (.2%)     | 11 (1.3%)   | 7 (2.7%)    | 4 (1%)      | 2 (.9%)     | 1 (.5%)     | 5 (2.1%)    | 58 (7.7%)   | 27 (6.6%)   | 0 (0%)      |
| Any MCH service                   | 550 (93.2%) | 441 (92.8%) | 326 (61.3%) | 543 (63.5%) | 147 (55.9%) | 313 (76.7%) | 175 (82.9%) | 167 (90.8%) | 106 (44%)   | 610 (81%)   | 256 (62.3%) | 476 (78.4%) |
| Comparison                        | Facility E  |             |             | Facility F  |             |             | Facility G  |             |             | Facility H  |             |             |
|                                   | 2009        | 2010        | 2012        | 2009        | 2010        | 2012        | 2009        | 2010        | 2012        | 2009        | 2010        | 2012        |
| <b>N</b>                          | 220         | 215         | 380         | 317         | 333         | 347         | 146         | 170         | 114         | 169         | 35          | 287         |
| <b>HIV/STI services received</b>  |             |             |             |             |             |             |             |             |             |             |             |             |
| HIV testing                       | 14 (6.4%)   | 16 (7.4%)   | 33 (8.7%)   | 14 (4.4%)   | 4 (1.2%)    | 16 (4.6%)   | 19 (13%)    | 0 (0%)      | 16 (14%)    | 22 (13%)    | 0 (0%)      | 6 (2.1%)    |
| HIV counselling                   | 10 (4.5%)   | 29 (13.5%)  | 114 (30%)   | 27 (8.5%)   | 13 (3.9%)   | 202 (58.2%) | 44 (30.1%)  | 4 (2.4%)    | 18 (15.8%)  | 24 (14.2%)  | 3 (8.6%)    | 18 (6.3%)   |
| HIV treatment                     | 9 (4.1%)    | 12 (5.6%)   | 31 (8.2%)   | 18 (5.7%)   | 7 (2.1%)    | 173 (49.9%) | 41 (28.1%)  | 78 (45.9%)  | 48 (42.1%)  | 4 (2.4%)    | 0 (0%)      | 96 (33.4%)  |
| PMTCT                             | 0 (0%)      | 28 (13%)    | 50 (13.2%)  | 0 (0%)      | 18 (5.4%)   | 15 (4.3%)   | 0 (0%)      | 9 (5.3%)    | 7 (6.1%)    | 0 (0%)      | 6 (17.1%)   | 16 (5.6%)   |
| STI counselling & testing         | 8 (3.6%)    | 13 (6%)     | 43 (11.3%)  | 24 (7.6%)   | 0 (0%)      | 101 (29.1%) | 15 (10.3%)  | 0 (0%)      | 3 (2.6%)    | 25 (14.8%)  | 0 (0%)      | 7 (2.4%)    |
| Any HIV/STI service               | 30 (13.6%)  | 64 (29.8%)  | 176 (46.3%) | 57 (18%)    | 36 (10.8%)  | 253 (72.9%) | 74 (50.7%)  | 91 (53.5%)  | 69 (60.5%)  | 45 (26.6%)  | 7 (20%)     | 123 (42.9%) |
| <b>MCH services received</b>      |             |             |             |             |             |             |             |             |             |             |             |             |
| Family planning provision         | 52 (23.6%)  | 57 (26.5%)  | 100 (26.3%) | 73 (23%)    | 128 (38.4%) | 39 (11.2%)  | 47 (32.2%)  | 12 (7.1%)   | 17 (14.9%)  | 43 (25.4%)  | 8 (22.9%)   | 32 (11.1%)  |
| Family planning counselling       | 23 (10.5%)  | 64 (29.8%)  | 148 (38.9%) | 41 (12.9%)  | 38 (11.4%)  | 117 (33.7%) | 44 (30.1%)  | 6 (3.5%)    | 23 (20.2%)  | 43 (25.4%)  | 7 (20%)     | 50 (17.4%)  |
| ANC                               | 45 (20.5%)  | 41 (19.1%)  | 58 (15.3%)  | 199 (62.8%) | 83 (24.9%)  | 40 (11.5%)  | 49 (33.6%)  | 7 (4.1%)    | 13 (11.4%)  | 49 (29%)    | 0 (0%)      | 21 (7.3%)   |
| PNC (mother or baby)              | 2 (.9%)     | 17 (7.9%)   | 14 (3.7%)   | 17 (5.4%)   | 20 (6%)     | 3 (.9%)     | 5 (3.4%)    | 1 (.6%)     | 9 (7.9%)    | 11 (6.5%)   | 1 (2.9%)    | 16 (5.6%)   |
| Cervical screen                   | 2 (.9%)     | 0 (0%)      | 23 (6.1%)   | 3 (.9%)     | 0 (0%)      | 0 (0%)      | 2 (1.4%)    | 0 (0%)      | 0 (0%)      | 6 (3.6%)    | 0 (0%)      | 2 (.7%)     |
| Child health (incl. Immunization) | 135 (61.4%) | 102 (47.4%) | 118 (31.1%) | 198 (62.5%) | 111 (33.3%) | 84 (24.2%)  | 81 (55.5%)  | 43 (25.3%)  | 22 (19.3%)  | 62 (36.7%)  | 31 (88.6%)  | 89 (31%)    |
| Other reproductive health service | 0 (0%)      | 0 (0%)      | 3 (.8%)     | 0 (0%)      | 0 (0%)      | 0 (0%)      | 0 (0%)      | 0 (0%)      | 2 (1.8%)    | 1 (.6%)     | 0 (0%)      | 3 (1%)      |
| Any MCH service                   | 204 (92.7%) | 204 (94.9%) | 312 (82.1%) | 311 (98.1%) | 322 (96.7%) | 238 (68.6%) | 133 (91.1%) | 63 (37.1%)  | 61 (53.5%)  | 133 (78.7%) | 33 (94.3%)  | 165 (57.5%) |





**Integration of HIV and maternal health care in a high HIV-prevalence setting: Analysis of client flow data over time in Swaziland**

|                                 |                                                                                                                                                                                                                                                                                                                                                                                                                                                                                                                                                                                                                                                                                                                                                                                      |
|---------------------------------|--------------------------------------------------------------------------------------------------------------------------------------------------------------------------------------------------------------------------------------------------------------------------------------------------------------------------------------------------------------------------------------------------------------------------------------------------------------------------------------------------------------------------------------------------------------------------------------------------------------------------------------------------------------------------------------------------------------------------------------------------------------------------------------|
| Journal:                        | <i>BMJ Open</i>                                                                                                                                                                                                                                                                                                                                                                                                                                                                                                                                                                                                                                                                                                                                                                      |
| Manuscript ID:                  | bmjopen-2013-003715.R2                                                                                                                                                                                                                                                                                                                                                                                                                                                                                                                                                                                                                                                                                                                                                               |
| Article Type:                   | Research                                                                                                                                                                                                                                                                                                                                                                                                                                                                                                                                                                                                                                                                                                                                                                             |
| Date Submitted by the Author:   | 07-Feb-2014                                                                                                                                                                                                                                                                                                                                                                                                                                                                                                                                                                                                                                                                                                                                                                          |
| Complete List of Authors:       | Birdthistle, Isolde; London School of Hygiene & Tropical Medicine, Department of Population Health<br>Mayhew, Susannah; London School of Hygiene & Tropical Medicine, Department of Global Health & Development<br>Kikuvi, Joshua; London School of Hygiene & Tropical Medicine, Department of Global Health & Development<br>Zhou, Weiwei; London School of Hygiene & Tropical Medicine, Department of Global Health & Development<br>Church, Kathryn; London School of Hygiene & Tropical Medicine, Department of Global Health & Development<br>Warren, Charlotte; Population Council,<br>Nkambule, Rejoice; Government of the Kingdom of Swaziland, Ministry of Health<br>Fenty, Justin; London School of Hygiene & Tropical Medicine, Department of Global Health & Development |
| <b>Primary Subject Heading</b>: | Health services research                                                                                                                                                                                                                                                                                                                                                                                                                                                                                                                                                                                                                                                                                                                                                             |
| Secondary Subject Heading:      | Global health, HIV/AIDS, Research methods, Reproductive medicine, Sexual health                                                                                                                                                                                                                                                                                                                                                                                                                                                                                                                                                                                                                                                                                                      |
| Keywords:                       | HIV & AIDS < INFECTIOUS DISEASES, Maternal medicine < OBSTETRICS, REPRODUCTIVE MEDICINE, SEXUAL MEDICINE                                                                                                                                                                                                                                                                                                                                                                                                                                                                                                                                                                                                                                                                             |
|                                 |                                                                                                                                                                                                                                                                                                                                                                                                                                                                                                                                                                                                                                                                                                                                                                                      |

SCHOLARONE™  
Manuscripts

**Title**

Integration of HIV and maternal health care in a high HIV-prevalence setting: Analysis of client flow data over time in Swaziland

**Authors and Affiliations**

Isolde J Birdthistle<sup>a</sup>, Susannah Mayhew<sup>b</sup>, Joshua Kikvi<sup>b,c</sup>, Weiwei Zhou<sup>b</sup>, Kathryn Church<sup>b</sup>, Charlotte Warren<sup>c</sup>, Rejoice Nkambule<sup>d</sup>, Justin Fenty<sup>b</sup> on behalf of the Integra Initiative

<sup>a</sup> Department of Population Health, London School of Hygiene & Tropical Medicine, London, UK

<sup>b</sup> Department of Global Health and Development, London School of Hygiene & Tropical Medicine, London, UK

<sup>c</sup> Population Council, Kenya

<sup>d</sup> Ministry of Health, Government of the Kingdom of Swaziland

**Corresponding author:**

Isolde J Birdthistle

Department of Population Health

Faculty of Epidemiology and Population Health

London School of Hygiene & Tropical Medicine

Room 145, Keppel Street, London, WC1E 7HT

E-mail: [Isolde.Birdthistle@lshtm.ac.uk](mailto:Isolde.Birdthistle@lshtm.ac.uk) Tel: +44 (0)20 7612 7889 Fax: +44 (0)20 7436 5389

**Word count:** 3190

## ABSTRACT

### Objective

Maternal and child health (MCH) care may provide an entry point for HIV services in high HIV-prevalence settings. Our objective was to assess integration of HIV with MCH services in public sector facilities in Swaziland.

### Design

In 2009, 2010 and 2012, client flow assessments were conducted over five days in the MCH units of eight government facilities, purposively selected as intervention or comparison sites.

### Participants

8263 MCH visits with female clients were tracked: 3261 in 2009; 2086 in 2010; and 2916 in 2012.

### Intervention

Activities and resources to strengthen integration of HIV services into post-natal care, 2009 - 2010.

### Main outcome measures

- (1) The proportion of all visits in which an HIV/STI testing, counselling or treatment was received together with an MCH service;
- (2) The proportion of all visits in which a client receives HIV counselling.

## Results

Across facilities, the proportion of visits in which both HIV/STI and MCH services were received varied considerably, e.g., from 9%-49% in 2009. HIV/STI services were integrated most frequently with child health, ante-natal care (ANC) and family planning – the most common reasons for women’s attendance – and least often with post-natal care (PNC) and cervical screening. There was no meaningful difference in integration over time by design group, and considerable heterogeneity across facilities. Receipt of integrated services increased in one intervention and two comparison facilities, where HIV counseling also rose, and fell in one intervention and two comparison facilities.

## Conclusions

Provision of HIV/STI services with MCH care occurred at all facilities, yet relatively few women receive integrated services. Increases in integration were driven by increases in HIV counseling while sharp declines in some facilities indicate integration is difficult to sustain. Opportunities for intensifying HIV integration lie with ANC, child health and family planning, while HIV-PNC integration will remain limited until more women attend PNC.

## Trial registry and number

Current Controlled Trials NCT01694862

## ARTICLE SUMMARY

### Article focus

- Maternal health care may provide an entry point for HIV services in high HIV-prevalence settings, yet little is known about actual integration of HIV with maternal care – or how integrated provision can be improved – in public sector facilities.
- Client flow assessments were conducted over five days in MCH units of eight facilities in Swaziland in 2009, 2010 and 2012 (N=8263 visits tracked) to determine the extent to which HIV/STI services were received with MCH services in the same visit, and in what combinations.
- We also assessed whether these outcomes improved with time in facilities which received an intervention designed to strengthen integration of HIV into post-natal care services (the Integra Initiative).

### Key messages

- Some provision of HIV/STI services with MCH care occurred at all facilities, indicating a capacity to integrate services in the public sector, yet relatively few women receive integrated services.
- In three facilities, increases in integration over time were driven by increases in HIV counselling. Sharp declines in other facilities suggest integration is difficult to sustain, given frequent staff rotation and vertical HIV treatment campaigns that can divert resources for integration.

- 1  
2  
3  
4  
5  
6  
7  
8  
9  
10  
11  
12  
13  
14  
15  
16  
17  
18  
19  
20  
21  
22  
23  
24  
25  
26  
27  
28  
29  
30  
31  
32  
33  
34  
35  
36  
37  
38  
39  
40  
41  
42  
43  
44  
45  
46  
47  
48  
49  
50  
51  
52  
53  
54  
55  
56  
57  
58  
59  
60
- There was no evidence of an increase in integration in three of four intervention facilities. Impact of the intervention to strengthen integration of HIV into PNC will remain limited until more women attend PNC; the best opportunities for scaling up HIV integration may lie with ANC, child health and family planning, given their frequent use.

### Strengths and limitations of this study

- The main strength is the scale and novelty of client flow data in public sector facilities in sub-Saharan Africa, offering detailed combinations of services received in every consultation. Such detail is typically unavailable from routine health information systems.
- An important limitation is the logistical challenge in conducting client flow assessments simultaneously across eight government facilities, affecting comparability of data across facilities and time points.

## INTRODUCTION

Maternal mortality and HIV have been described as “intersecting epidemics” which must be simultaneously tackled.<sup>1, 2</sup> In the setting for this study – Swaziland, where more than 40% of pregnant women are infected with HIV – HIV is intimately linked with maternal mortality and hinders efforts to lower maternal death rates.<sup>3, 4</sup>

Since the International Conference on Population and Development in 1994, a strong case has been made for integrating HIV services into sexual and reproductive health (SRH) with potential benefits for both clients and facilities.<sup>5, 6</sup> Integration can simultaneously address clients’ reproductive health goals and their needs for HIV prevention and treatment and PMTCT.<sup>7</sup> Process evaluations of integrated HIV and family planning (FP) services indicate that facilities can gain by increasing the provision, uptake and efficiency of services while improving client satisfaction and reducing HIV-related stigma in clinics.<sup>8</sup>

More recently, the case for expanding integration of HIV/AIDS services to maternal, neonatal, child health and nutrition, including family planning, is supported in a systematic review which concludes that integration of such services is feasible to implement under certain circumstances.<sup>9</sup> Furthermore, such integration can yield positive effects on the quality of services as well as client outcomes including contraceptive use, antiretroviral therapy in pregnancy, and HIV testing.<sup>9</sup>

Maternal and child health services can thus serve as entry points for HIV prevention, treatment and care, particularly in contexts of high HIV prevalence. Yet little is known about existing

1  
2  
3 levels of integration, particularly in public sector health facilities, or how provision can be  
4  
5 improved and scaled up.<sup>8</sup>  
6  
7

8  
9 The Integra Initiative is a large-scale non-randomised evaluation designed to assess different  
10  
11 models of SRH-HIV integration, including the integration of HIV/STI services with post-natal  
12  
13 care (PNC) in Swaziland. Although not a randomised controlled trial, Integra was registered for  
14  
15 good practice and transparency (Current Controlled Trials NCT01694862). The specific models  
16  
17 of integration and their hypothesised benefits for clients and health care efficiency are  
18  
19 detailed in the Integra study protocol.<sup>10</sup> In brief, Integra defines integration as the provision of  
20  
21 two or more services in the same visit, with the model in Swaziland focusing on post-natal care  
22  
23 as an entry point for HIV/STI counselling, testing and/or treatment services.  
24  
25  
26  
27

28  
29 As part of the Integra Initiative, this study analysed client flow data collected in eight public  
30  
31 sector facilities in Swaziland in 2009, 2010 and 2012, to determine whether clients seeking  
32  
33 maternal and child health services (MCH) receive integrated services, and if so, in what  
34  
35 combinations of HIV/STI and MCH services.<sup>10</sup> We also sought to understand how the receipt  
36  
37 of integrated services differs over time and between facilities which did and did not receive the  
38  
39 Integra intervention. We hoped the answers would help identify gaps and opportunities for  
40  
41 integrating HIV within maternal health services and achieving universal access to both.  
42  
43  
44  
45  
46  
47  
48

## 49 **METHODS**

### 50 **Data Collection**

51  
52  
53  
54  
55 As part of Integra's non-randomised design, eight public sector facilities were selected from  
56  
57 three of Swaziland's four regions. Four facilities were purposively designated as Intervention  
58  
59  
60



1  
2  
3 facilities (referred to as Facilities A-D), based on their previous participation in an operations  
4  
5 research study by Population Council, one of the Integra institutional partners.<sup>11</sup> Four  
6  
7 comparison facilities were selected based on their distance from intervention sites (to avoid  
8  
9 contamination) and no current (at the time in 2008) provision of integrated HIV-PNC services  
10  
11 (Facilities E-H), as determined by discussions with the Ministry of Health and site visits by  
12  
13 Population Council.  
14  
15  
16  
17  
18  
19

20  
21 In the intervention facilities, between October 2009 and December 2010, Integra delivered a  
22  
23 programme designed to strengthen and maintain the provision of integrated HIV and PNC  
24  
25 services. The intervention components included: (a) a training package to facilitate mentoring  
26  
27 of front-line health providers by more experienced providers; (b) job aids to promote  
28  
29 integration, including the Balanced Counselling Strategy Plus (BCS+) toolkit containing an  
30  
31 algorithm, counselling cards and brochures to support counselling, including HIV service  
32  
33 provision, within PNC consultations,<sup>11, 12</sup> and (c) ongoing support to discuss role clarification,  
34  
35 organisational change, referral/linkages and management of service statistics.  
36  
37  
38  
39  
40  
41  
42

43 The client flow assessments (CFAs) comprise one data component of the Integra evaluation.  
44  
45 The CFAs were modelled on the Patient Flow Analysis, a method developed by the Centers for  
46  
47 Disease Control in the 1970s to track patients' movements through a clinic over one day,<sup>13, 14</sup>  
48  
49 and shown to be effective in measuring intervention effectiveness within the context of usual  
50  
51 practice.<sup>15</sup> In this context, CFAs were designed to capture service utilisation patterns among  
52  
53 clients seeking MCH services, given that data on integrated service provision were not  
54  
55 available from routine clinical data (which collect data on different services in separate  
56  
57  
58  
59  
60

1  
2  
3 registers). Specifically, CFAs were conducted in all study facilities in November 2009, December  
4  
5 2010, and August 2012. Over a period of five days, Monday through Friday, all clients entering  
6  
7 the facility for MCH health services were given a client flow form by teams of trained local  
8  
9 researchers or service providers. Clients carried the form throughout their visit, and each  
10  
11 service provider they saw completed the form in their consultation room/cubicle, indicating  
12  
13 session start/end times, the service(s) received by the client and any referrals to other  
14  
15 providers.  
16  
17  
18  
19  
20

21  
22  
23 The first CFA (late November 2009) was conducted soon after the intervention began in  
24  
25 October 2009, but before it was fully implemented in any site. For logistical reasons, the client  
26  
27 flow assessments could not be conducted in the same week of each year. And specific  
28  
29 circumstances in some facilities meant the assessments could not be simultaneous in all eight  
30  
31 sites, as the protocol had intended. In some facilities, with the support of facility managers,  
32  
33 client flow assessments were conducted for more than the five days intended. To preserve the  
34  
35 original protocol design, we restricted this analysis to the first Monday through Friday on  
36  
37 which data were collected.  
38  
39  
40  
41  
42

### 43 **Data analysis**

44  
45  
46 We defined our unit of analysis to be a visit, which comprised all providers seen and services  
47  
48 received in the same day for each client, as captured on the client assessment form. Clients  
49  
50 were either a single adult or an adult plus a child. We excluded visits of males aged 12 years or  
51  
52 over, to focus on maternal and child health services. The age of 12 was selected as  
53  
54 reproductive health services were received by females as young as 12.  
55  
56  
57  
58  
59  
60

1  
2  
3 The following primary and secondary outcomes were calculated for each facility and time  
4  
5 point:  
6  
7

- 8  
9 1. Receipt of integrated HIV-MCH services: the proportion of all visits in which a client  
10 receives any HIV or STI service, specifically: HIV testing, counselling or treatment;  
11  
12 PMTCT; or STI counselling or testing  
13

14  
15  
16 *and*  
17

18  
19 any of the following MCH services: FP counselling or provision; PNC for mother or  
20  
21 baby; cervical cancer screening; child health (including weighing and immunisations);  
22  
23 and antenatal care (ANC).  
24  
25

26  
27 We hypothesised that HIV-MCH integration would increase in facilities which received  
28  
29 the Integra intervention.  
30  
31

- 32  
33 2. Receipt of HIV counselling: the proportion of all visits in which a client receives HIV  
34  
35 counselling.  
36  
37

38  
39 We hypothesised that HIV counselling would increase as a result of the Integra  
40  
41 intervention, regardless of women's need for HIV testing or treatment which are not  
42  
43 constant (medical histories, including the need for testing or treatment, were not  
44  
45 captured on the CFA form).  
46  
47

48  
49 We also sought to describe which MCH services were most commonly combined with HIV/STI  
50  
51 services, by calculating the percentage of visits in which an HIV/STI service was combined with  
52  
53 each type of MCH service. We examined the change over time in the proportion of visits  
54  
55 receiving integrated HIV/STI and MCH services (primary outcome) and HIV counselling  
56  
57  
58  
59  
60

1  
2  
3 (secondary outcome) separately for each facility. We used the 95% confidence interval around  
4  
5 the difference (in the 2010 and 2012 proportions compared to 2009) as an indication of  
6  
7 whether the observed change was due to chance (if it included the null value of zero).  
8  
9

10  
11 To examine differences in the key outcomes by design group, we calculated the risk difference  
12  
13 in 2010 and 2012 (each compared to 2009) for intervention versus comparison facilities for  
14  
15 both the primary and secondary outcomes using a two-stage approach. In the first stage we  
16  
17 estimated facility-level residuals by fitting a logistic regression model and including terms to  
18  
19 adjust for baseline value (corresponding proportion of visits in 2009), average annual client  
20  
21 load (<10000, 10000+), and rural/urban status. Difference residuals were then obtained as the  
22  
23 difference between the observed and predicted values (divided by facility size). In the second  
24  
25 stage we analysed the facility-level residuals, based on the assumption that in the absence of  
26  
27 any intervention effect the residuals should be distributed normally with no systematic  
28  
29 difference between the intervention and comparison arms. Difference residuals were analysed  
30  
31 using linear regression including an interaction term representing the difference in 'change  
32  
33 from baseline' between the design groups.  
34  
35  
36  
37  
38  
39  
40

#### 41 **Ethics Statement**

42  
43  
44 Ethics approval for the client flow assessments was obtained from the Swaziland Scientific  
45  
46 Review Board, the London School of Hygiene & Tropical Medicine and the Population Council  
47  
48 Institutional Review Board.  
49  
50  
51  
52  
53  
54

#### 55 **RESULTS**

1  
2  
3 Across eight facilities, 3261 visits were tracked in November 2009, 2086 visits in December  
4  
5 2010, and 2916 in August 2012. Table 1 presents general characteristics of the visits and  
6  
7 facilities. Additional details about each facility are provided in Supplementary Table 1. Overall,  
8  
9 about half of the visits included an adult female and child (under 12 years), versus an adult  
10  
11 client only, although this proportion varied across facilities (range: 28%-95%). In almost all  
12  
13 facilities, clients received on average more than one service during their visit, with many  
14  
15 receiving two or more. Each year, approximately eight percent of clients did not receive any  
16  
17 service or referral during their visit, with the highest proportions in the facilities with highest  
18  
19 client load (e.g., 18% of clients in Facility B and 31% in Facility D in 2010). In all facilities, and in  
20  
21 both years, child health services were either the first or second most common service received.  
22  
23 Family planning counselling or provision, and ante-natal care, were among the top three  
24  
25 services for most facilities. Across facilities, the least common services received were post-natal  
26  
27 care and cervical screening (See Supplementary Table 2).  
28  
29  
30  
31  
32  
33  
34  
35  
36  
37  
38  
39  
40  
41  
42  
43  
44  
45  
46  
47  
48  
49  
50  
51  
52  
53  
54  
55  
56  
57  
58  
59  
60

Table 1. Characteristics of the facilities, visits and services tracked in 2009, 2010 and 2012

| Intervention                                                     | Facility A  |             |             | Facility B  |             |             | Facility C  |             |             | Facility D  |             |             |
|------------------------------------------------------------------|-------------|-------------|-------------|-------------|-------------|-------------|-------------|-------------|-------------|-------------|-------------|-------------|
|                                                                  | 2009        | 2010        | 2012        | 2009        | 2010        | 2012        | 2009        | 2010        | 2012        | 2009        | 2010        | 2012        |
| <b>Visits tracked</b>                                            | 590         | 475         | 532         | 855         | 263         | 408         | 211         | 184         | 241         | 753         | 411         | 607         |
| <b>Client category</b>                                           |             |             |             |             |             |             |             |             |             |             |             |             |
| Adult (12+ years) only                                           | 395 (66.9%) | 196 (41.3%) | 211 (39.7%) | 443 (51.8%) | 153 (58.2%) | 172 (42.2%) | 144 (68.2%) | 87 (47.3%)  | 82 (34%)    | 310 (41.2%) | 197 (47.9%) | 408 (67.2%) |
| Adult + child                                                    | 176 (29.8%) | 278 (58.5%) | 320 (60.2%) | 153 (17.9%) | 109 (41.4%) | 236 (57.8%) | 64 (30.3%)  | 97 (52.7%)  | 156 (64.7%) | 93 (12.4%)  | 213 (51.8%) | 198 (32.6%) |
| <b>Adult age</b>                                                 |             |             |             |             |             |             |             |             |             |             |             |             |
| Mean [sd]                                                        | 26.2 [6.4]  | 26.2 [7.2]  | 26.3 [6.5]  | 26.8 [8.2]  | 27 [7.2]    | 26.6 [7.3]  | 28.5 [8.4]  | 26.8 [8]    | 27.7 [8.5]  | 27.6 [7.4]  | 27.3 [8.4]  | 31.3 [10.2] |
| Missing                                                          | 9 (1.5%)    | 258 (54.3%) | 17 (3.2%)   | 357 (41.8%) | 40 (15.2%)  | 13 (3.2%)   | 2 (.9%)     | 2 (1.1%)    | 1 (.4%)     | 382 (50.7%) | 165 (40.1%) | 12 (2%)     |
| <b>Services received per visit</b>                               |             |             |             |             |             |             |             |             |             |             |             |             |
| None                                                             | 37 (6.3%)   | 24 (5.1%)   | 88 (16.5%)  | 134 (15.7%) | 47 (17.9%)  | 23 (5.6%)   | 11 (5.2%)   | 6 (3.3%)    | 32 (13.3%)  | 93 (12.4%)  | 129 (31.4%) | 29 (4.8%)   |
| One                                                              | 319 (54.1%) | 106 (22.3%) | 192 (36.1%) | 479 (56%)   | 145 (55.1%) | 208 (51%)   | 47 (22.3%)  | 57 (31%)    | 114 (47.3%) | 246 (32.7%) | 135 (32.8%) | 238 (39.2%) |
| Two or more                                                      | 234 (39.7%) | 345 (72.6%) | 252 (47.4%) | 242 (28.3%) | 71 (27%)    | 177 (43.4%) | 153 (72.5%) | 121 (65.8%) | 95 (39.4%)  | 414 (55%)   | 147 (35.8%) | 340 (56%)   |
| <b>Visits where ≥1 service received</b>                          |             |             |             |             |             |             |             |             |             |             |             |             |
| Mean [sd] services received                                      | 1.8 [1.3]   | 2.5 [1.4]   | 2.6 [2]     | 1.6 [1.1]   | 1.4 [8]     | 2 [1.6]     | 2.6 [1.7]   | 2 [1]       | 1.9 [1.3]   | 2.1 [1.2]   | 2 [1.3]     | 2 [1.3]     |
| Mean [sd] providers seen                                         | 1.3 [5]     | 1.5 [5]     | 1.6 [9]     | 1.2 [4]     | 1 [2]       | 1.4 [7]     | 1.3 [5]     | 1.1 [4]     | 1.3 [5]     | 1.5 [7]     | 1.5 [7]     | 1.1 [3]     |
| <b>Visits where no services were either referred or received</b> | 36 (6.1%)   | 22 (4.6%)   | 88 (16.5%)  | 112 (13.1%) | 47 (17.9%)  | 15 (3.7%)   | 7 (3.3%)    | 6 (3.3%)    | 16 (6.6%)   | 81 (10.8%)  | 69 (16.8%)  | 29 (4.8%)   |
| <b>Average annual client load*</b>                               | 32,321      |             |             | 65,794      |             |             | 9,974       |             |             | 40,485      |             |             |
| <b>Setting (urban/rural)</b>                                     | Urban       |             |             | Urban       |             |             | Peri-urban  |             |             | Urban       |             |             |
| Comparison                                                       | Facility E  |             |             | Facility F  |             |             | Facility G  |             |             | Facility H  |             |             |
|                                                                  | 2009        | 2010        | 2012        | 2009        | 2010        | 2012        | 2009        | 2010        | 2012        | 2009        | 2010        | 2012        |
| <b>Visits tracked</b>                                            | 220         | 215         | 380         | 317         | 333         | 347         | 146         | 170         | 114         | 169         | 35          | 287         |
| <b>Client category</b>                                           |             |             |             |             |             |             |             |             |             |             |             |             |
| Adult (12+ years) only                                           | 131 (59.5%) | 72 (33.5%)  | 234 (61.6%) | 194 (61.2%) | 183 (55%)   | 154 (44.4%) | 74 (50.7%)  | 106 (62.4%) | 47 (41.2%)  | 110 (65.1%) | 2 (5.7%)    | 178 (62%)   |
| Adult + child                                                    | 78 (35.5%)  | 143 (66.5%) | 145 (38.2%) | 117 (36.9%) | 150 (45%)   | 193 (55.6%) | 69 (47.3%)  | 64 (37.6%)  | 67 (58.8%)  | 48 (28.4%)  | 33 (94.3%)  | 107 (37.3%) |
| <b>Adult age</b>                                                 |             |             |             |             |             |             |             |             |             |             |             |             |
| Mean [sd]                                                        | 26 [7.5]    | 26 [5.9]    | 34.5 [12.6] | 26.1 [6.2]  | 26.4 [6.3]  | 26.5 [7.4]  | 27.4 [7.8]  | 31.4 [10.8] | 26.5 [7.2]  | 25.1 [6]    | 29.5 [10.6] | 30.9 [11.9] |
| Missing                                                          | 1 (.5%)     | 95 (44.2%)  | 53 (13.9%)  | 5 (1.6%)    | 124 (37.2%) | 9 (2.6%)    | 0 (0%)      | 6 (3.5%)    | 5 (4.4%)    | 0 (0%)      | 33 (94.3%)  | 67 (23.3%)  |
| <b>Services received per visit</b>                               |             |             |             |             |             |             |             |             |             |             |             |             |
| None                                                             | 10 (4.5%)   | 3 (1.4%)    | 13 (3.4%)   | 1 (.3%)     | 5 (1.5%)    | 8 (2.3%)    | 11 (7.5%)   | 6 (3.5%)    | 14 (12.3%)  | 31 (18.3%)  | 0 (0%)      | 29 (10.1%)  |
| One                                                              | 99 (45%)    | 34 (15.8%)  | 45 (11.8%)  | 100 (31.5%) | 177 (53.2%) | 46 (13.3%)  | 19 (13%)    | 84 (49.4%)  | 32 (28.1%)  | 32 (18.9%)  | 8 (22.9%)   | 155 (54%)   |
| Two or more                                                      | 111 (50.5%) | 178 (82.8%) | 322 (84.7%) | 216 (68.1%) | 151 (45.3%) | 293 (84.4%) | 116 (79.5%) | 80 (47.1%)  | 68 (59.6%)  | 106 (62.7%) | 27 (77.1%)  | 103 (35.9%) |
| <b>Visits where ≥1 service received</b>                          |             |             |             |             |             |             |             |             |             |             |             |             |
| Mean [sd] services received                                      | 1.8 [1.1]   | 2.4 [1.1]   | 3.2 [1.6]   | 2.3 [1.6]   | 1.6 [9]     | 3.4 [1.6]   | 3.2 [1.6]   | 1.6 [6]     | 2.6 [1.6]   | 2.7 [1.6]   | 2.8 [1.3]   | 1.8 [1.5]   |
| Mean [sd] providers seen                                         | 1.3 [5]     | 1.1 [2]     | 1.7 [7]     | 1.8 [8]     | 1 [2]       | 1.3 [6]     | 1.5 [5]     | 1.4 [6]     | 1.3 [6]     | 1.4 [6]     | 1.1 [3]     | 1.2 [5]     |
| <b>Visits where no services were either referred or received</b> | 9 (4.1%)    | 2 (.9%)     | 12 (3.2%)   | 1 (.3%)     | 5 (1.5%)    | 7 (2%)      | 11 (7.5%)   | 5 (2.9%)    | 8 (7%)      | 3 (1.8%)    | 0 (0%)      | 21 (7.3%)   |
| <b>Average annual client load*</b>                               | 7,736       |             |             | 28,202      |             |             | 9,674       |             |             | 6,959       |             |             |
| <b>Setting (urban/rural)</b>                                     | Rural       |             |             | Peri-urban  |             |             | Rural       |             |             | Rural       |             |             |

\*Annual client load taken from health facility assessments conducted for the Integra Initiative in 2010. All tables are N (%) unless indicated otherwise.

### Receipt of integrated HIV-MCH services

There was evidence of HIV-MCH integration at all facilities and time points, although the extent of integration (the proportion of visits in which integrated HIV-MCH services were received) varied by facility: specifically, between 9% and 49% in 2009, 2%-22% in 2010 and 10-44% in 2012 (see Table 2). In the short-term, five facilities experienced declines in integration between 2009 and 2010: by seven and 13 percentage points in two intervention facilities; and by 12, 19 and 48 percentage points in three comparison facilities. In the longer-term, integration increased in one intervention site (Facility A, from 9% in 2009 to 17% of visits in 2012) and two comparison facilities (Facility E, from 11% to 37%; and Facility F, from 16% to 44% in 2012, after experiencing an initial drop to 9% in 2010). Meanwhile, integration fell in one intervention site (Facility C, from 33% to 16%) and two comparison facilities (Facility G, from 49% to 27%; Facility H, from 25% to 14%). Two intervention facilities (B and D) experienced no significant change in HIV-MCH integration between 2009 and 2012.

Table 2. Proportion of visits receiving the primary and secondary outcomes, by facility, year and design group

|                                                                                   | Intervention    |                      |                 |                      |                |                       |                |                      |                             |                       |
|-----------------------------------------------------------------------------------|-----------------|----------------------|-----------------|----------------------|----------------|-----------------------|----------------|----------------------|-----------------------------|-----------------------|
|                                                                                   | Facility A      |                      | Facility B      |                      | Facility C     |                       | Facility D     |                      | All intervention facilities |                       |
|                                                                                   | Outcome         | Change from baseline | Outcome         | Change from baseline | Outcome        | Change from baseline  | Outcome        | Change from baseline | Outcome†                    | Change from baseline‡ |
| <b>Outcome 1: Any HIV/STI service plus any MCH service received in same visit</b> |                 |                      |                 |                      |                |                       |                |                      |                             |                       |
| 2009                                                                              | 54/590 (9.2%)   |                      | 83/855 (9.7%)   |                      | 69/211 (32.7%) |                       | 98/753 (13%)   |                      | 16.1%                       |                       |
| 2010                                                                              | 74/475 (15.6%)  | 6.4% (2.4, 10.4)     | 6/263 (2.3%)    | -7.4% (-10.1, -4.7)  | 38/184 (20.7%) | -12% (-20.7, -3.4)    | 73/411 (17.8%) | 4.7% (.3, 9.2)       | 14.1%                       | -0.8% (-19.3, 17.7)   |
| 2012                                                                              | 91/532 (17.1%)  | 8% (4, 11.9)         | 40/408 (9.8%)   | .1% (-3.4, 3.6)      | 38/241 (15.8%) | -16.9% (-24.8, -9.1)  | 78/607 (12.9%) | -2% (-3.8, 3.4)      | 13.9%                       | -8.1% (-27.0, 10.8)   |
| <b>Outcome 2: HIV counselling received</b>                                        |                 |                      |                 |                      |                |                       |                |                      |                             |                       |
| 2009                                                                              | 38/590 (6.4%)   |                      | 38/855 (4.4%)   |                      | 56/211 (26.5%) |                       | 24/753 (3.2%)  |                      | 10.2%                       |                       |
| 2010                                                                              | 72/475 (15.2%)  | 8.7% (4.9, 12.5)     | 20/263 (7.6%)   | 3.2% (-.3, 6.6)      | 30/184 (16.3%) | -10.2% (-18.2, -2.2)  | 54/411 (13.1%) | 10% (6.5, 13.5)      | 13.1%                       | 0.1% (-13.0, 13.2)    |
| 2012                                                                              | 81/532 (15.2%)  | 8.8% (5.1, 12.4)     | 13/408 (3.2%)   | -1.3% (-3.5, .9)     | 21/241 (8.7%)  | -17.8% (-24.8, -10.9) | 53/607 (8.7%)  | 5.5% (3, 8.1)        | 9.0%                        | -11% (-32.6, 10.6)    |
|                                                                                   | Comparison      |                      |                 |                      |                |                       |                |                      |                             |                       |
|                                                                                   | Facility E      |                      | Facility F      |                      | Facility G     |                       | Facility H     |                      | All comparison facilities   |                       |
|                                                                                   | Outcome         | Change from baseline | Outcome         | Change from baseline | Outcome        | Change from baseline  | Outcome        | Change from baseline | Outcome†                    | Change from baseline‡ |
| <b>Outcome 1: Any HIV/STI service plus any MCH service received in same visit</b> |                 |                      |                 |                      |                |                       |                |                      |                             |                       |
| 2009                                                                              | 24/220 (10.9%)  |                      | 52/317 (16.4%)  |                      | 72/146 (49.3%) |                       | 42/169 (24.9%) |                      | 25.4%                       |                       |
| 2010                                                                              | 57/215 (26.5%)  | 15.6% (8.4, 22.8)    | 30/333 (9%)     | -7.4% (-12.5, -2.3)  | 6/170 (3.5%)   | -45.8% (-54.4, -37.2) | 5/35 (14.3%)   | -10.6% (-23.9, 2.7)  | 13.3%                       | -10.8% (-29.2, 7.7)   |
| 2012                                                                              | 141/380 (37.1%) | 26.2% (19.8, 32.6)   | 154/347 (44.4%) | 28% (21.3, 34.6)     | 31/114 (27.2%) | -22.1% (-33.6, -10.6) | 39/287 (13.6%) | -11.3% (-18.9, -3.6) | 30.6%                       | 0.6% (-19.5, 18.2)    |
| <b>Outcome 2: HIV counselling received</b>                                        |                 |                      |                 |                      |                |                       |                |                      |                             |                       |
| 2009                                                                              | 10/220 (4.5%)   |                      | 27/317 (8.5%)   |                      | 44/146 (30.1%) |                       | 24/169 (14.2%) |                      | 14.4%                       |                       |
| 2010                                                                              | 29/215 (13.5%)  | 8.9% (3.6, 14.3)     | 13/333 (3.9%)   | -4.6% (-8.3, -.9)    | 4/170 (2.4%)   | -27.8% (-35.6, -20)   | 3/35 (8.6%)    | -5.6% (-16.3, 5)     | 7.1%                        | -10.1% (-23.1, 3.0)   |
| 2012                                                                              | 114/380 (30%)   | 25.5% (20.1, 30.8)   | 202/347 (58.2%) | 49.7% (43.7, 55.7)   | 18/114 (15.8%) | -14.3% (-24.4, -4.3)  | 18/287 (6.3%)  | -7.9% (-13.9, -2)    | 27.6%                       | 3.4% (-18.2, 25.0)    |

†Unadjusted cluster-level proportions analysed separately at each time point. ‡Change from baseline adjusted for facility size and rural/urban status. All confidence intervals are at 95% confidence level.



### Combinations of HIV/STI and MCH services received

In 2009, at least one client in every facility received each type of HIV-MCH integration investigated; that is, one or more clients received integration of HIV-FP (provision and counselling), HIV-ANC, HIV-PNC (for mother or baby), HIV-cervical screening (HIV-CS), and HIV-child health (HIV-CH). Figure 1 shows the proportion of visits in which each service combination was received at each facility. The most common integration in 2009 was HIV with child health services (up to 33% of all visits in Facility G), followed by HIV-ANC and HIV-FP (counselling or provision). Less frequent was integration of HIV services with PNC (a maximum of 6% of visits in Facility C) or cervical screening (maximum 6% of visits in Facility D).

In 2010, integration of HIV services with the MCH services no longer occurred in every facility. For example, in three facilities there were zero visits in which integration of HIV services and family planning occurred; in one intervention and all comparison facilities there was no integration of HIV services and cervical screening services; and in two comparison sites, there were no cases of HIV-ANC and HIV-PNC integration. Excluding the latter two sites, integration of HIV-ANC was the most common type of integration in 2010. Between 2009 and 2012, HIV integration with FP counselling rose in facilities A, E and F - the same facilities that experienced increases in overall HIV-MCH integration. HIV-FP counselling integration declined in the other facilities, and integration of HIV and PNC services – the focus of the intervention – remained low in all facilities over time.

### **Receipt of HIV counselling**

As a secondary outcome, we hypothesised that HIV counselling would increase in the intervention facilities. Table 2 shows that the proportion of visits in which a client received HIV counselling increased between 2009 and 2012 in two intervention (A,D) and two comparison facilities (E,F), and declined in two intervention sites (Facility C) and two comparison sites (G,H). The absolute numbers of visits that included HIV counselling are presented in Figure 2, which also shows that HIV counselling was more often provided in combination with an MCH service than alone. Specifically, HIV counselling was most often provided together with ANC, FP counselling or child health services (data not shown).

### **Evidence of an intervention effect**

As shown in Table 2 (final column), there was no statistical evidence that integration increased over time in intervention facilities as a group. On average, the intervention facilities provided integrated services in 16 percent of visits in 2009 and 14 percent in both 2010 and 2012. Nor was there statistical evidence that the proportion of visits providing HIV counselling increased in the intervention group (averaging 10% in 2009 and 9% in 2012). In the comparison group, both overall HIV-MCH integration and HIV counselling increased between 2009 and 2012 (by 5 and 13 percentage points) after experiencing a decline in 2010. For these differences, 95% confidence intervals include the null value of zero. Between the intervention and comparison groups, there was no statistical difference in change from baseline levels of HIV-MCH integration or provision of HIV counselling (data not shown).

## DISCUSSION

1  
2  
3  
4  
5  
6  
7  
8  
9  
10  
11  
12  
13  
14  
15  
16  
17  
18  
19  
20  
21  
22  
23  
24  
25  
26  
27  
28  
29  
30  
31  
32  
33  
34  
35  
36  
37  
38  
39  
40  
41  
42  
43  
44  
45  
46  
47  
48  
49  
50  
51  
52  
53  
54  
55  
56  
57  
58  
59  
60

With what we believe are among the most detailed data on HIV-MCH integration in the public sector in Africa, we have been able to assess the extent to which clients are receiving integrated services, and in which combinations over time. The client flow assessments have shown that HIV/STI services (counselling, testing and treatment) are being integrated with a wide range of MCH services, including family planning, ante-natal care, post-natal care, cervical screening and child health services. This is evidence of the capacity to integrate, in large urban facilities as well as small, rural facilities across Swaziland. It also fills a current gap in evidence – regarding the feasibility of integrating HIV services with infant/child health services, and postnatal/postpartum services. A recent systematic review of integration evaluations identified both models as ‘inadequately studied’ to date.<sup>9</sup>

Nevertheless, integration occurred in a minority of visits and varied considerably across facilities. Furthermore, the level of integration fell in three of the eight facilities between 2009 and 2012. The facility with the highest level of integration in 2009 dropped to the lowest a year later (from 49% to <2%). This may be explained by the existence of an NGO campaign to increase access to ART in the area of that facility during the 2010 assessment, as HIV treatment appears to have displaced almost all other HIV and MCH services. This suggests that integration can be susceptible to vertical programmes or competing priorities, particularly in smaller facilities where the 2010 declines in integration were steepest.

It is also possible that integration declined in settings where clients did not need HIV services with every visit. The CFA did not capture clients’ history or need for such services, and thus we

1  
2  
3 cannot interpret observed changes in their provision. For this reason we were particularly  
4  
5 interested in the provision of HIV counselling, which can be promoted regardless of need for  
6  
7 testing or treatment. HIV counselling rose in two intervention and two comparison facilities. In  
8  
9 the three sites where HIV-MCH integration rose, this appeared to be driven by an increase in  
10  
11 HIV counselling. That HIV counselling was most often provided with an MCH service rather  
12  
13 than alone suggests it has a role to play in scaling up integration, but requires a concerted  
14  
15 effort to sustain its provision.  
16  
17  
18  
19  
20  
21  
22

23 The most common form of integration observed was between HIV services and child health,  
24  
25 followed by ANC and FP. These services may offer the best opportunities for integration with  
26  
27 HIV, given most women attended for child health, ANC and FP services. This is particularly  
28  
29 encouraging in light of a recent review concluding that uptake of PMTCT in sub-Saharan  
30  
31 Africa is inadequate, but improves with an integrated family-centred approach, for example, if  
32  
33 HIV treatment is provided at antenatal clinics.<sup>7</sup>  
34  
35  
36  
37  
38  
39

40 Less common was integration of HIV/STI with PNC or cervical screening, most likely due to the  
41  
42 lower number of clients receiving PNC and cervical screening relative to other services (or  
43  
44 PNC clients may have received HIV/STI testing in recent ANC visits). This suggests that  
45  
46 potential effectiveness of the Integra Initiative – which focuses on HIV-PNC integration in  
47  
48 Swaziland – may be limited until more clients attend for PNC services. And this may require  
49  
50 further investment in equipment and training for PNC (as well as cervical screening, as only  
51  
52 one facility had the capacity to offer immediate cryotherapy) as well as demand creation to  
53  
54 increase service uptake.  
55  
56  
57  
58  
59  
60

1  
2  
3  
4  
5 The formal comparison of integration by study design (intervention versus comparison sites)  
6  
7 showed no statistical difference in HIV-MCH integration over time. Neither was there a  
8  
9 meaningful difference in the receipt of HIV counselling in the intervention group over time.  
10  
11  
12  
13

### 14 15 16 **Limitations and the challenges of embedding research in 'real-world' settings**

17  
18 The observed changes in levels of integration, and absence of an intervention effect, could be  
19  
20 due to a number of factors which we were unable to account for given the non-randomised  
21  
22 design, as well as challenges implementing the protocol as intended.  
23  
24  
25  
26  
27  
28

29 With regard to design: in a small country with limited number of facilities, intervention sites  
30  
31 could not be matched with similar-sized comparison facilities. This resulted in systematically  
32  
33 different groups, with intervention facilities primarily large and urban, and comparison facilities  
34  
35 mostly small and rural. Also, the comparison sites – which were determined to have no  
36  
37 provision of integration prior to the study in 2008 – were shown via the client flow assessments  
38  
39 to be offering integrated HIV-RH services by 2009. Given the heterogeneity, and the focus on a  
40  
41 facility-specific outcome in this analysis, we felt it was more informative to compare changes  
42  
43 by facility than study design. The wide variation we observed across facilities likely reflects the  
44  
45 different capacities and infrastructure available to provide integrated services, i.e., facilities can  
46  
47 not follow the same 'blue print' for integration, particularly given the variability in facility size,  
48  
49 client volumes and staffing levels among the eight study facilities. Detailed case studies are  
50  
51 underway to explore the role of facility differences in greater depth, including intervention  
52  
53  
54  
55  
56  
57  
58  
59  
60

1  
2  
3 dose and quality, as well as contextual information, to enhance interpretation of the levels and  
4  
5 patterns of integration revealed by the client flow assessments.  
6  
7

8  
9  
10 Some observed changes may also be due to 'seasonal' differences in 2009 and 2010.  
11  
12 Coordinating client flow assessments across eight facilities proved logistically challenging and  
13  
14 synchronicity was not always achieved as intended. In 2010, most assessments were delayed  
15  
16 until the week before Christmas (as compared to November 2009) which may account for the  
17  
18 smaller number of clients in most facilities in 2010. This timing may have affected the range of  
19  
20 services provided and may account for different patterns of integration. Smaller, rural facilities  
21  
22 – where the drops in integration were the steepest - may be impacted more than large, rural  
23  
24 sites during such holiday periods.  
25  
26  
27  
28  
29

30  
31  
32 It is also possible that provision of HIV and MCH services may fluctuate frequently or  
33  
34 periodically, in patterns we could not detect from 5-day 'snapshot' assessments (regardless of  
35  
36 their specific timing). An early evaluation of CDC's 'patient flow analysis' method, conducted  
37  
38 over one day in family planning clinics in Kenya, concluded that: "the 'typical' clinic day does  
39  
40 not really exist. The client/patient load and staffing patterns are likely to vary according to  
41  
42 many factors: by day of the week, or season of the year, staff vacation or sickness, etc."<sup>14</sup>  
43  
44 Assessments were extended to five days in this study, yet, neither does the 'typical' clinic week  
45  
46 exist. It may be more informative to monitor over a longer period, for more representative  
47  
48 data. However, the 5-day assessments proved challenging and resource-intensive to  
49  
50 implement, and longer versions may be prohibitive in many settings. Previous evaluations of  
51  
52 patient flow analyses also note that data may not be representative since staff – aware of the  
53  
54  
55  
56  
57  
58  
59  
60

1  
2  
3 assessment – may try to perform at their best.<sup>14</sup> For these reasons, strengthening routine data  
4  
5 collection systems may be preferable, but many existing systems record services individually in  
6  
7 separate registers, and are thus unable to document service integration without fundamentally  
8  
9 changing the system. It was this barrier that led us to utilise the client flow assessment.  
10  
11

## 12 13 14 15 16 **Conclusions**

17  
18 The client flow assessment provided rich detail about the range and combinations of services  
19  
20 received by large number of clients. This was valuable for understanding whether and how HIV  
21  
22 and MCH services are integrated in practice. The data confirm that, in a context of high HIV  
23  
24 prevalence, capacity exists in public sector services for integration of HIV services into MCH  
25  
26 care. In particular, ANC, child health and family planning provide promising entry-points for  
27  
28 reaching the largest number of women. Sustaining HIV-MCH integration may require  
29  
30 concerted effort over time. The study limitations reflect the challenges of embedding rigorous  
31  
32 research into existing and diverse facilities (i.e., 'real-world' evaluations), and difficulties in  
33  
34 recording the provision of integrated services.  
35  
36  
37  
38  
39  
40  
41  
42  
43  
44  
45  
46  
47  
48  
49  
50  
51  
52  
53  
54  
55  
56  
57  
58  
59  
60

## Acknowledgements

The authors are grateful to the clients and the Integra fieldwork team for collecting and managing the data used in this analysis. The Integra research PI's are: Susannah Mayhew, Charlotte Warren and Anna Vassall. We also acknowledge the support of the Ministry of Health and facility managers and providers for supporting and facilitating the client flow assessments.

## Funding statement

This work was supported by the Bill and Melinda Gates Foundation. No funding bodies had any role in study design, data collection and analysis, decision to publish, or preparation of the manuscript.

## Author contributions

SM, JK, CW, KC, RN helped to design the data collection. JK managed the data collection. JF and WZ cleaned and managed the datasets. IB and JF led the analysis. All authors provided input into the data interpretation. IB drafted the manuscript. All authors read and commented on a complete draft.

## Data sharing

The dataset will be made available via an LSHTM repository upon completion of the Integra Initiative.

## Competing interests statement

The authors have declared that no competing interests exist.



1  
2  
3 **REFERENCE LIST**  
4

- 5 1. McIntyre J. Mothers infected with HIV. *Br Med Bull.* 2003;67:127-35
- 6 2. PLoS Medicine Editors, . HIV in maternal and child health: concurrent crises demand  
7 cooperation. *PLoS Med.* 2010 Jul;7(7):e1000311
- 8 3. Abdool-Karim Q, Abouzahr C, Dehne K et al. HIV and maternal mortality: turning the tide.  
9 *Lancet.* 2010 Jun 5;375(9730):1948-9
- 10 4. Kingdom of Swaziland. Swaziland Country Report on Monitoring the Political Declaration on  
11 HIV and AIDS. Kingdom of Swaziland: 2012.
- 12 5. United Nations. Programme of Action of the United Nations International Conference on  
13 Population and Development Cairo: 1995.
- 14 6. WHO, UNAIDS, IPPF, UNFPA Linking Sexual and Reproductive Health and HIV/AIDS. Geneva:  
15 2005.
- 16 7. Wettstein C, Mugglin C, Egger M, et al. Missed Opportunities to Prevent Mother-to-Child-  
17 Transmission in sub-Saharan Africa: Systematic Review and Meta-Analysis. *Aids.* 2012 Aug 31
- 18 8. Church K, Mayhew SH. Integration of STI and HIV prevention, care, and treatment into family  
19 planning services: a review of the literature. *Stud Fam Plann.* 2009 Sep;40(3):171-86
- 20 9. Lindegren ML, Kennedy CE, Bain-Brickley D, et al. Integration of HIV/AIDS services with  
21 maternal, neonatal and child health, nutrition, and family planning services. *Cochrane Database Syst*  
22 *Rev.* 2012;9:CD010119
- 23 10. Warren CE, Mayhew SH, Vassall A, et al. Study protocol for the Integra Initiative to assess the  
24 benefits and costs of integrating sexual and reproductive health and HIV services in Kenya and  
25 Swaziland. *BMC Public Health.* 2012;12:973
- 26 11. Warren C, Shongwe R, Waligo A, et al. Repositioning Postnatal Care in a High HIV Environment:  
27 Swaziland. 2008.
- 28 12. Population Council. The Balanced Counseling Strategy Plus: A toolkit for family planning  
29 service providers working in High HIV/STI prevalence settings  
30 [http://www.popcouncil.org/publications/books/2012\\_BalancedCounselingStrategyPLUS.asp2012](http://www.popcouncil.org/publications/books/2012_BalancedCounselingStrategyPLUS.asp2012).
- 31 13. Centers for Disease Control and Prevention. Available from:  
32 [http://www.cdc.gov/reproductivehealth/ProductsPubs/PFA\\_support/](http://www.cdc.gov/reproductivehealth/ProductsPubs/PFA_support/).
- 33 14. Lynam PF, Smith T, Dwyer J. Client flow analysis: a practical management technique for  
34 outpatient clinic settings. *International Journal for Quality in Health Care* 1994;6(2):179-86
- 35 15. Potisek NM, Malone RM, Shilliday BB, et al. Use of patient flow analysis to improve patient  
36 visit efficiency by decreasing wait time in a primary care-based disease management programs for  
37 anticoagulation and chronic pain: A quality improvement study.
- 38  
39  
40  
41  
42  
43  
44  
45  
46  
47  
48  
49  
50  
51  
52  
53  
54  
55  
56  
57  
58  
59  
60

**Title**

Integration of HIV and maternal health care in a high HIV-prevalence setting: Analysis of client flow data over time in Swaziland

**Authors and Affiliations**

Isolde J Birdthistle<sup>a</sup>, Susannah Mayhew<sup>b</sup>, Joshua Kikvi<sup>b,c</sup>, Weiwei Zhou<sup>b</sup>, Kathryn Church<sup>b</sup>, Charlotte Warren<sup>c</sup>, Rejoice Nkambule<sup>d</sup>, Justin Fenty<sup>b</sup> on behalf of the Integra Initiative

<sup>a</sup> Department of Population Health, London School of Hygiene & Tropical Medicine, London, UK

<sup>b</sup> Department of Global Health and Development, London School of Hygiene & Tropical Medicine, London, UK

<sup>c</sup> Population Council, Kenya

<sup>d</sup> Ministry of Health, Government of the Kingdom of Swaziland

**Corresponding author:**

Isolde J Birdthistle

Department of Population Health

Faculty of Epidemiology and Population Health

London School of Hygiene & Tropical Medicine

Room 145, Keppel Street, London, WC1E 7HT

E-mail: [Isolde.Birdthistle@lshtm.ac.uk](mailto:Isolde.Birdthistle@lshtm.ac.uk) Tel: +44 (0)20 7612 7889 Fax: +44 (0)20 7436 5389

**Word count:** 3190

## ABSTRACT

### Objective

Maternal and child health (MCH) care may provide an entry point for HIV services in high HIV-prevalence settings. Our objective was to assess integration of HIV with MCH services in public sector facilities in Swaziland.

### Design

In 2009, 2010 and 2012, client flow assessments were conducted over five days in the MCH units of eight government facilities, purposively selected as intervention or comparison sites.

### Participants

8263 MCH visits with female clients were tracked: 3261 in 2009; 2086 in 2010; and 2916 in 2012.

### Intervention

Activities and resources to strengthen integration of HIV services into post-natal care, 2009 - 2010.

### Main outcome measures

- (1) The proportion of all visits in which an HIV/STI testing, counselling or treatment was received together with an MCH service;
- (2) The proportion of all visits in which a client receives HIV counselling.

## Results

Across facilities, the proportion of visits in which both HIV/STI and MCH services were received varied considerably, e.g., from 9%-49% in 2009. HIV/STI services were integrated most frequently with child health, ante-natal care (ANC) and family planning – the most common reasons for women’s attendance – and least often with post-natal care (PNC) and cervical screening. There was no meaningful difference in integration over time by design group, and considerable heterogeneity across facilities. Receipt of integrated services increased in one intervention and two comparison facilities, where HIV counseling also rose, and fell in one intervention and two comparison facilities.

## Conclusions

Provision of HIV/STI services with MCH care occurred at all facilities, yet relatively few women receive integrated services. Increases in integration were driven by increases in HIV counseling while sharp declines in some facilities indicate integration is difficult to sustain. Opportunities for intensifying HIV integration lie with ANC, child health and family planning, while HIV-PNC integration will remain limited until more women attend PNC.

## Trial registry and number

Current Controlled Trials NCT01694862

## ARTICLE SUMMARY

### Article focus

- Maternal health care may provide an entry point for HIV services in high HIV-prevalence settings, yet little is known about actual integration of HIV with maternal care – or how integrated provision can be improved – in public sector facilities.
- Client flow assessments were conducted over five days in MCH units of eight facilities in Swaziland in 2009, 2010 and 2012 (N=8263 visits tracked) to determine the extent to which HIV/STI services were received with MCH services in the same visit, and in what combinations.
- We also assessed whether these outcomes improved with time in facilities which received an intervention designed to strengthen integration of HIV into post-natal care services (the Integra Initiative).

### Key messages

- Some provision of HIV/STI services with MCH care occurred at all facilities, indicating a capacity to integrate services in the public sector, yet relatively few women receive integrated services.
- In three facilities, increases in integration over time were driven by increases in HIV counselling. Sharp declines in other facilities suggest integration is difficult to sustain, given frequent staff rotation and vertical HIV treatment campaigns that can divert resources for integration.

- 1  
2  
3  
4  
5  
6  
7  
8  
9  
10  
11  
12  
13  
14  
15  
16  
17  
18  
19  
20  
21  
22  
23  
24  
25  
26  
27  
28  
29  
30  
31  
32  
33  
34  
35  
36  
37  
38  
39  
40  
41  
42  
43  
44  
45  
46  
47  
48  
49  
50  
51  
52  
53  
54  
55  
56  
57  
58  
59  
60
- There was no evidence of an increase in integration in three of four intervention facilities. Impact of the intervention to strengthen integration of HIV into PNC will remain limited until more women attend PNC; the best opportunities for scaling up HIV integration may lie with ANC, child health and family planning, given their frequent use.

### Strengths and limitations of this study

- The main strength is the scale and novelty of client flow data in public sector facilities in sub-Saharan Africa, offering detailed combinations of services received in every consultation. Such detail is typically unavailable from routine health information systems.
- An important limitation is the logistical challenge in conducting client flow assessments simultaneously across eight government facilities, affecting comparability of data across facilities and time points.

## INTRODUCTION

Maternal mortality and HIV have been described as “intersecting epidemics” which must be simultaneously tackled.<sup>1, 2</sup> In the setting for this study – Swaziland, where more than 40% of pregnant women are infected with HIV – HIV is intimately linked with maternal mortality and hinders efforts to lower maternal death rates.<sup>3, 4</sup>

Since the International Conference on Population and Development in 1994, a strong case has been made for integrating HIV services into sexual and reproductive health (SRH) with potential benefits for both clients and facilities.<sup>5, 6</sup> Integration can simultaneously address clients’ reproductive health goals and their needs for HIV prevention and treatment and PMTCT.<sup>7</sup> Process evaluations of integrated HIV and family planning (FP) services indicate that facilities can gain by increasing the provision, uptake and efficiency of services while improving client satisfaction and reducing HIV-related stigma in clinics.<sup>8</sup>

More recently, the case for expanding integration of HIV/AIDS services to maternal, neonatal, child health and nutrition, including family planning, is supported in a systematic review which concludes that integration of such services is feasible to implement under certain circumstances.<sup>9</sup> Furthermore, such integration can yield positive effects on the quality of services as well as client outcomes including contraceptive use, antiretroviral therapy in pregnancy, and HIV testing.<sup>9</sup>

Maternal and child health services can thus serve as entry points for HIV prevention, treatment and care, particularly in contexts of high HIV prevalence. Yet little is known about existing

1  
2  
3 levels of integration, particularly in public sector health facilities, or how provision can be  
4  
5 improved and scaled up.<sup>8</sup>  
6  
7

8  
9 The Integra Initiative is a large-scale non-randomised evaluation designed to assess different  
10  
11 models of SRH-HIV integration, including the integration of HIV/STI services with post-natal  
12  
13 care (PNC) in Swaziland. Although not a randomised controlled trial, Integra was registered for  
14  
15 good practice and transparency (Current Controlled Trials NCT01694862). The specific models  
16  
17 of integration ~~—including the use of post-natal care as an entry point for HIV/STI services in~~  
18  
19 ~~Swaziland—~~ and their hypothesised benefits for clients and health care efficiency are detailed  
20  
21 in the Integra study protocol.<sup>10</sup> In brief, Integra defines integration as the provision of two or  
22  
23 more services in the same visit, with the model in Swaziland focusing on post-natal care as an  
24  
25 entry point for HIV/STI counselling, testing and/or treatment services.  
26  
27  
28  
29

30  
31 As part of the Integra Initiative, this study analysed client flow data collected in eight public  
32  
33 sector facilities in Swaziland in 2009, 2010 and 2012, to determine whether clients seeking  
34  
35 maternal and child health services (MCH) receive integrated services, and if so, in what  
36  
37 combinations of HIV/STI and MCH services.<sup>10</sup> We also sought to understand how the receipt  
38  
39 of integrated services differs over time and between facilities which did and did not receive the  
40  
41 Integra intervention. We hoped the answers would help identify gaps and opportunities for  
42  
43 integrating HIV within maternal health services and achieving universal access to both.  
44  
45  
46  
47  
48  
49

## 50 51 **METHODS**

### 52 53 54 **Data Collection**



1  
2  
3 As part of Integra's non-randomised design, eight public sector facilities were selected from  
4  
5 three of Swaziland's four regions. Four facilities were purposively designated as Intervention  
6  
7 facilities (referred to as Facilities A-D), based on their previous participation in an operations  
8  
9 research study by Population Council, one of the Integra institutional partners.<sup>11</sup> Four  
10  
11 comparison facilities were selected based on their distance from intervention sites (to avoid  
12  
13 contamination) and no current (at the time in 2008) provision of integrated HIV-PNC services  
14  
15 (Facilities E-H), as determined by discussions with the Ministry of Health and site visits by  
16  
17 Population Council.  
18  
19  
20  
21  
22  
23  
24

25 In the intervention facilities, between October 2009 and December 2010, Integra delivered a  
26  
27 programme designed to strengthen and maintain the provision of integrated HIV and PNC  
28  
29 services. The intervention components included: (a) a training package to facilitate mentoring  
30  
31 of front-line health providers by more experienced providers; (b) job aids to promote  
32  
33 integration, including the Balanced Counselling Strategy Plus (BCS+) toolkit containing an  
34  
35 algorithm, counselling cards and brochures to support counselling, including HIV service  
36  
37 provision, within PNC consultations;<sup>11, 12</sup> and (c) ongoing support to discuss role clarification,  
38  
39 organisational change, referral/linkages and management of service statistics.  
40  
41  
42  
43  
44  
45  
46

47 The client flow assessments (CFAs) comprise one data component of the Integra evaluation.  
48  
49 The CFAs were modelled on the Patient Flow Analysis, a method developed by the Centers for  
50  
51 Disease Control in the 1970s to track patients' movements through a clinic over one day,<sup>13, 14</sup>  
52  
53 and shown to be effective in measuring intervention effectiveness within the context of usual  
54  
55 practice.<sup>15</sup> In this context, CFAs were designed to capture service utilisation patterns among  
56  
57  
58  
59  
60

1  
2  
3 clients seeking MCH services, given that data on integrated service provision were not  
4  
5 available from routine clinical data (which collect data on different services in separate  
6  
7 registers). Specifically, CFAs were conducted in all study facilities in November 2009, December  
8  
9 2010, and August 2012. Over a period of five days, Monday through Friday, all clients entering  
10  
11 the facility for MCH health services were given a client flow form by teams of trained local  
12  
13 researchers or service providers. Clients carried the form throughout their visit, and each  
14  
15 service provider they saw completed the form in their consultation room/cubicle, indicating  
16  
17 session start/end times, the service(s) received by the client and any referrals to other  
18  
19 providers.  
20  
21  
22  
23  
24  
25  
26

27  
28 The first CFA (late November 2009) was conducted soon after the intervention began in  
29  
30 October 2009, but before it was fully implemented in any site. For logistical reasons, the client  
31  
32 flow assessments could not be conducted in the same week of each year. And specific  
33  
34 circumstances in some facilities meant the assessments could not be simultaneous in all eight  
35  
36 sites, as the protocol had intended. [In some facilities, with the support of facility managers,](#)  
37  
38 [client flow assessments were conducted for more than the five days intended. To preserve the](#)  
39  
40 [original protocol design, we restricted this analysis to the first Monday through Friday on](#)  
41  
42 [which data were collected.](#)  
43  
44  
45  
46  
47

### 48 **Data analysis**

49  
50  
51 We defined our unit of analysis to be a visit, which comprised all providers seen and services  
52  
53 received in the same day for each client, as captured on the client assessment form. Clients  
54  
55 were either a single adult or an adult plus a child. We excluded visits of males aged 12 years or  
56  
57  
58  
59  
60

1  
2  
3 over, to focus on maternal and child health services. The age of 12 was selected as  
4  
5 reproductive health services were received by females as young as 12.  
6  
7

8  
9 The following primary and secondary outcomes were calculated for each facility and time  
10  
11 point:  
12

- 13  
14 1. Receipt of integrated HIV-MCH services: the proportion of all visits in which a client  
15  
16 receives any HIV or STI service, specifically: HIV testing, counselling or treatment;  
17  
18 PMTCT; or STI counselling or testing  
19

20  
21  
22 *and*  
23

24  
25 any of the following MCH services: FP counselling or provision; PNC for mother or  
26  
27 baby; cervical cancer screening; child health (including weighing and immunisations);  
28  
29 and antenatal care (ANC).  
30  
31

32  
33 We hypothesised that HIV-MCH integration would increase in facilities which received  
34  
35 the Integra intervention.  
36  
37

- 38  
39 2. Receipt of HIV counselling: the proportion of all visits in which a client receives HIV  
40  
41 counselling.  
42

43  
44 We hypothesised that HIV counselling would increase as a result of the Integra  
45  
46 intervention, regardless of women's need for HIV testing or treatment which are not  
47  
48 constant (medical histories, including the need for testing or treatment, were not  
49  
50 captured on the CFA form).  
51  
52

53  
54 We also sought to describe which MCH services were most commonly combined with HIV/STI  
55  
56 services, by calculating the percentage of visits in which an HIV/STI service was combined with  
57  
58  
59  
60

1  
2  
3 each type of MCH service. We examined the change over time in the proportion of visits  
4  
5 receiving integrated HIV/STI and MCH services (primary outcome) and HIV counselling  
6  
7 (secondary outcome) separately for each facility. We used the 95% confidence interval around  
8  
9 the difference (in the 2010 and 2012 proportions compared to 2009) as an indication of  
10  
11 whether the observed change was due to chance (if it included the null value of zero).  
12  
13

14  
15 To examine differences in the key outcomes by design group, we calculated the risk difference  
16  
17 in 2010 and 2012 (each compared to 2009) for intervention versus comparison facilities for  
18  
19 both the primary and secondary outcomes using a two-stage approach. In the first stage we  
20  
21 estimated facility-level residuals by fitting a logistic regression model and including terms to  
22  
23 adjust for baseline value (corresponding proportion of visits in 2009), average annual client  
24  
25 load (<10000, 10000+), and rural/urban status. Difference residuals were then obtained as the  
26  
27 difference between the observed and predicted values (divided by facility size). In the second  
28  
29 stage we analysed the facility-level residuals, based on the assumption that in the absence of  
30  
31 any intervention effect the residuals should be distributed normally with no systematic  
32  
33 difference between the intervention and comparison arms. Difference residuals were analysed  
34  
35 using linear regression including an interaction term representing the difference in 'change  
36  
37 from baseline' between the design groups.  
38  
39  
40  
41  
42  
43  
44  
45

#### 46 **Ethics Statement**

47

48  
49 Ethics approval for the client flow assessments was obtained from the Swaziland Scientific  
50  
51 Review Board, the London School of Hygiene & Tropical Medicine and the Population Council  
52  
53 Institutional Review Board.  
54  
55  
56  
57  
58  
59  
60

## RESULTS

Across eight facilities, 3261 visits were tracked in November 2009, 2086 visits in December 2010, and 2916 in August 2012. Table 1 presents general characteristics of the visits and facilities. Additional details about each facility are provided in Supplementary Table 1. Overall, about half of the visits included an adult female and child (under 12 years), versus an adult client only, although this proportion varied across facilities (range: 28%-95%). In almost all facilities, clients received on average more than one service during their visit, with many receiving two or more. Each year, approximately eight percent of clients did not receive any service or referral during their visit, with the highest proportions in the facilities with highest client load (e.g., 18% of clients in Facility B and 31% in Facility D in 2010). In all facilities, and in both years, child health services were either the first or second most common service received. Family planning counselling or provision, and ante-natal care, were among the top three services for most facilities. Across facilities, the least common services received were post-natal care and cervical screening (See Supplementary Table 2).

Table 1. Characteristics of the facilities, visits and services tracked in 2009, 2010 and 2012

| Intervention                                                     | Facility A  |             |             | Facility B  |             |             | Facility C  |             |             | Facility D  |             |             |
|------------------------------------------------------------------|-------------|-------------|-------------|-------------|-------------|-------------|-------------|-------------|-------------|-------------|-------------|-------------|
|                                                                  | 2009        | 2010        | 2012        | 2009        | 2010        | 2012        | 2009        | 2010        | 2012        | 2009        | 2010        | 2012        |
| <b>Visits tracked</b>                                            | 590         | 475         | 532         | 855         | 263         | 408         | 211         | 184         | 241         | 753         | 411         | 607         |
| <b>Client category</b>                                           |             |             |             |             |             |             |             |             |             |             |             |             |
| Adult (12+ years) only                                           | 395 (66.9%) | 196 (41.3%) | 211 (39.7%) | 443 (51.8%) | 153 (58.2%) | 172 (42.2%) | 144 (68.2%) | 87 (47.3%)  | 82 (34%)    | 310 (41.2%) | 197 (47.9%) | 408 (67.2%) |
| Adult + child                                                    | 176 (29.8%) | 278 (58.5%) | 320 (60.2%) | 153 (17.9%) | 109 (41.4%) | 236 (57.8%) | 64 (30.3%)  | 97 (52.7%)  | 156 (64.7%) | 93 (12.4%)  | 213 (51.8%) | 198 (32.6%) |
| <b>Adult age</b>                                                 |             |             |             |             |             |             |             |             |             |             |             |             |
| Mean [sd]                                                        | 26.2 [6.4]  | 26.2 [7.2]  | 26.3 [6.5]  | 26.8 [8.2]  | 27 [7.2]    | 26.6 [7.3]  | 28.5 [8.4]  | 26.8 [8]    | 27.7 [8.5]  | 27.6 [7.4]  | 27.3 [8.4]  | 31.3 [10.2] |
| Missing                                                          | 9 (1.5%)    | 258 (54.3%) | 17 (3.2%)   | 357 (41.8%) | 40 (15.2%)  | 13 (3.2%)   | 2 (.9%)     | 2 (1.1%)    | 1 (.4%)     | 382 (50.7%) | 165 (40.1%) | 12 (2%)     |
| <b>Services received per visit</b>                               |             |             |             |             |             |             |             |             |             |             |             |             |
| None                                                             | 37 (6.3%)   | 24 (5.1%)   | 88 (16.5%)  | 134 (15.7%) | 47 (17.9%)  | 23 (5.6%)   | 11 (5.2%)   | 6 (3.3%)    | 32 (13.3%)  | 93 (12.4%)  | 129 (31.4%) | 29 (4.8%)   |
| One                                                              | 319 (54.1%) | 106 (22.3%) | 192 (36.1%) | 479 (56%)   | 145 (55.1%) | 208 (51%)   | 47 (22.3%)  | 57 (31%)    | 114 (47.3%) | 246 (32.7%) | 135 (32.8%) | 238 (39.2%) |
| Two or more                                                      | 234 (39.7%) | 345 (72.6%) | 252 (47.4%) | 242 (28.3%) | 71 (27%)    | 177 (43.4%) | 153 (72.5%) | 121 (65.8%) | 95 (39.4%)  | 414 (55%)   | 147 (35.8%) | 340 (56%)   |
| <b>Visits where ≥1 service received</b>                          |             |             |             |             |             |             |             |             |             |             |             |             |
| Mean [sd] services received                                      | 1.8 [1.3]   | 2.5 [1.4]   | 2.6 [2]     | 1.6 [1.1]   | 1.4 [8]     | 2 [1.6]     | 2.6 [1.7]   | 2 [1]       | 1.9 [1.3]   | 2.1 [1.2]   | 2 [1.3]     | 2 [1.3]     |
| Mean [sd] providers seen                                         | 1.3 [5]     | 1.5 [5]     | 1.6 [9]     | 1.2 [4]     | 1 [2]       | 1.4 [7]     | 1.3 [5]     | 1.1 [4]     | 1.3 [5]     | 1.5 [7]     | 1.5 [7]     | 1.1 [3]     |
| <b>Visits where no services were either referred or received</b> | 36 (6.1%)   | 22 (4.6%)   | 88 (16.5%)  | 112 (13.1%) | 47 (17.9%)  | 15 (3.7%)   | 7 (3.3%)    | 6 (3.3%)    | 16 (6.6%)   | 81 (10.8%)  | 69 (16.8%)  | 29 (4.8%)   |
| <b>Average annual client load*</b>                               | 32,321      |             |             | 65,794      |             |             | 9,974       |             |             | 40,485      |             |             |
| <b>Setting (urban/rural)</b>                                     | Urban       |             |             | Urban       |             |             | Peri-urban  |             |             | Urban       |             |             |
| Comparison                                                       | Facility E  |             |             | Facility F  |             |             | Facility G  |             |             | Facility H  |             |             |
|                                                                  | 2009        | 2010        | 2012        | 2009        | 2010        | 2012        | 2009        | 2010        | 2012        | 2009        | 2010        | 2012        |
| <b>Visits tracked</b>                                            | 220         | 215         | 380         | 317         | 333         | 347         | 146         | 170         | 114         | 169         | 35          | 287         |
| <b>Client category</b>                                           |             |             |             |             |             |             |             |             |             |             |             |             |
| Adult (12+ years) only                                           | 131 (59.5%) | 72 (33.5%)  | 234 (61.6%) | 194 (61.2%) | 183 (55%)   | 154 (44.4%) | 74 (50.7%)  | 106 (62.4%) | 47 (41.2%)  | 110 (65.1%) | 2 (5.7%)    | 178 (62%)   |
| Adult + child                                                    | 78 (35.5%)  | 143 (66.5%) | 145 (38.2%) | 117 (36.9%) | 150 (45%)   | 193 (55.6%) | 69 (47.3%)  | 64 (37.6%)  | 67 (58.8%)  | 48 (28.4%)  | 33 (94.3%)  | 107 (37.3%) |
| <b>Adult age</b>                                                 |             |             |             |             |             |             |             |             |             |             |             |             |
| Mean [sd]                                                        | 26 [7.5]    | 26 [5.9]    | 34.5 [12.6] | 26.1 [6.2]  | 26.4 [6.3]  | 26.5 [7.4]  | 27.4 [7.8]  | 31.4 [10.8] | 26.5 [7.2]  | 25.1 [6]    | 29.5 [10.6] | 30.9 [11.9] |
| Missing                                                          | 1 (.5%)     | 95 (44.2%)  | 53 (13.9%)  | 5 (1.6%)    | 124 (37.2%) | 9 (2.6%)    | 0 (0%)      | 6 (3.5%)    | 5 (4.4%)    | 0 (0%)      | 33 (94.3%)  | 67 (23.3%)  |
| <b>Services received per visit</b>                               |             |             |             |             |             |             |             |             |             |             |             |             |
| None                                                             | 10 (4.5%)   | 3 (1.4%)    | 13 (3.4%)   | 1 (.3%)     | 5 (1.5%)    | 8 (2.3%)    | 11 (7.5%)   | 6 (3.5%)    | 14 (12.3%)  | 31 (18.3%)  | 0 (0%)      | 29 (10.1%)  |
| One                                                              | 99 (45%)    | 34 (15.8%)  | 45 (11.8%)  | 100 (31.5%) | 177 (53.2%) | 46 (13.3%)  | 19 (13%)    | 84 (49.4%)  | 32 (28.1%)  | 32 (18.9%)  | 8 (22.9%)   | 155 (54%)   |
| Two or more                                                      | 111 (50.5%) | 178 (82.8%) | 322 (84.7%) | 216 (68.1%) | 151 (45.3%) | 293 (84.4%) | 116 (79.5%) | 80 (47.1%)  | 68 (59.6%)  | 106 (62.7%) | 27 (77.1%)  | 103 (35.9%) |
| <b>Visits where ≥1 service received</b>                          |             |             |             |             |             |             |             |             |             |             |             |             |
| Mean [sd] services received                                      | 1.8 [1.1]   | 2.4 [1.1]   | 3.2 [1.6]   | 2.3 [1.6]   | 1.6 [9]     | 3.4 [1.6]   | 3.2 [1.6]   | 1.6 [6]     | 2.6 [1.6]   | 2.7 [1.6]   | 2.8 [1.3]   | 1.8 [1.5]   |
| Mean [sd] providers seen                                         | 1.3 [5]     | 1.1 [2]     | 1.7 [7]     | 1.8 [8]     | 1 [2]       | 1.3 [6]     | 1.5 [5]     | 1.4 [6]     | 1.3 [6]     | 1.4 [6]     | 1.1 [3]     | 1.2 [5]     |
| <b>Visits where no services were either referred or received</b> | 9 (4.1%)    | 2 (.9%)     | 12 (3.2%)   | 1 (.3%)     | 5 (1.5%)    | 7 (2%)      | 11 (7.5%)   | 5 (2.9%)    | 8 (7%)      | 3 (1.8%)    | 0 (0%)      | 21 (7.3%)   |
| <b>Average annual client load*</b>                               | 7,736       |             |             | 28,202      |             |             | 9,674       |             |             | 6,959       |             |             |
| <b>Setting (urban/rural)</b>                                     | Rural       |             |             | Peri-urban  |             |             | Rural       |             |             | Rural       |             |             |

\*Annual client load taken from health facility assessments conducted for the Integra Initiative in 2010. All tables are N (%) unless indicated otherwise.

### Receipt of integrated HIV-MCH services

There was evidence of HIV-MCH integration at all facilities and time points, although the extent of integration (the proportion of visits in which integrated HIV-MCH services were received) varied by facility: specifically, between 9% and 49% in 2009, 2%-22% in 2010 and 10-44% in 2012 (see Table 2). In the short-term, five facilities experienced declines in integration between 2009 and 2010: by seven and 13 percentage points in two intervention facilities; and by 12, 19 and 48 percentage points in three comparison facilities. In the longer-term, integration increased in one intervention site (Facility A, from 9% in 2009 to 17% of visits in 2012) and two comparison facilities (Facility E, from 11% to 37%; and Facility F, from 16% to 44% in 2012, after experiencing an initial drop to 9% in 2010). Meanwhile, integration fell in one intervention site (Facility C, from 33% to 16%) and two comparison facilities (Facility G, from 49% to 27%; Facility H, from 25% to 14%). Two intervention facilities (B and D) experienced no significant change in HIV-MCH integration between 2009 and 2012.

Table 2. Proportion of visits receiving the primary and secondary outcomes, by facility, year and design group

|                                                                                   | Intervention    |                      |                 |                      |                |                       |                |                      |                             |                       |
|-----------------------------------------------------------------------------------|-----------------|----------------------|-----------------|----------------------|----------------|-----------------------|----------------|----------------------|-----------------------------|-----------------------|
|                                                                                   | Facility A      |                      | Facility B      |                      | Facility C     |                       | Facility D     |                      | All intervention facilities |                       |
|                                                                                   | Outcome         | Change from baseline | Outcome         | Change from baseline | Outcome        | Change from baseline  | Outcome        | Change from baseline | Outcome†                    | Change from baseline‡ |
| <b>Outcome 1: Any HIV/STI service plus any MCH service received in same visit</b> |                 |                      |                 |                      |                |                       |                |                      |                             |                       |
| 2009                                                                              | 54/590 (9.2%)   |                      | 83/855 (9.7%)   |                      | 69/211 (32.7%) |                       | 98/753 (13%)   |                      | 16.1%                       |                       |
| 2010                                                                              | 74/475 (15.6%)  | 6.4% (2.4, 10.4)     | 6/263 (2.3%)    | -7.4% (-10.1, -4.7)  | 38/184 (20.7%) | -12% (-20.7, -3.4)    | 73/411 (17.8%) | 4.7% (.3, 9.2)       | 14.1%                       | -0.8% (-19.3, 17.7)   |
| 2012                                                                              | 91/532 (17.1%)  | 8% (4, 11.9)         | 40/408 (9.8%)   | .1% (-3.4, 3.6)      | 38/241 (15.8%) | -16.9% (-24.8, -9.1)  | 78/607 (12.9%) | -2% (-3.8, 3.4)      | 13.9%                       | -8.1% (-27.0, 10.8)   |
| <b>Outcome 2: HIV counselling received</b>                                        |                 |                      |                 |                      |                |                       |                |                      |                             |                       |
| 2009                                                                              | 38/590 (6.4%)   |                      | 38/855 (4.4%)   |                      | 56/211 (26.5%) |                       | 24/753 (3.2%)  |                      | 10.2%                       |                       |
| 2010                                                                              | 72/475 (15.2%)  | 8.7% (4.9, 12.5)     | 20/263 (7.6%)   | 3.2% (-.3, 6.6)      | 30/184 (16.3%) | -10.2% (-18.2, -2.2)  | 54/411 (13.1%) | 10% (6.5, 13.5)      | 13.1%                       | 0.1% (-13.0, 13.2)    |
| 2012                                                                              | 81/532 (15.2%)  | 8.8% (5.1, 12.4)     | 13/408 (3.2%)   | -1.3% (-3.5, .9)     | 21/241 (8.7%)  | -17.8% (-24.8, -10.9) | 53/607 (8.7%)  | 5.5% (3, 8.1)        | 9.0%                        | -11% (-32.6, 10.6)    |
|                                                                                   | Comparison      |                      |                 |                      |                |                       |                |                      |                             |                       |
|                                                                                   | Facility E      |                      | Facility F      |                      | Facility G     |                       | Facility H     |                      | All comparison facilities   |                       |
|                                                                                   | Outcome         | Change from baseline | Outcome         | Change from baseline | Outcome        | Change from baseline  | Outcome        | Change from baseline | Outcome†                    | Change from baseline‡ |
| <b>Outcome 1: Any HIV/STI service plus any MCH service received in same visit</b> |                 |                      |                 |                      |                |                       |                |                      |                             |                       |
| 2009                                                                              | 24/220 (10.9%)  |                      | 52/317 (16.4%)  |                      | 72/146 (49.3%) |                       | 42/169 (24.9%) |                      | 25.4%                       |                       |
| 2010                                                                              | 57/215 (26.5%)  | 15.6% (8.4, 22.8)    | 30/333 (9%)     | -7.4% (-12.5, -2.3)  | 6/170 (3.5%)   | -45.8% (-54.4, -37.2) | 5/35 (14.3%)   | -10.6% (-23.9, 2.7)  | 13.3%                       | -10.8% (-29.2, 7.7)   |
| 2012                                                                              | 141/380 (37.1%) | 26.2% (19.8, 32.6)   | 154/347 (44.4%) | 28% (21.3, 34.6)     | 31/114 (27.2%) | -22.1% (-33.6, -10.6) | 39/287 (13.6%) | -11.3% (-18.9, -3.6) | 30.6%                       | 0.6% (-19.5, 18.2)    |
| <b>Outcome 2: HIV counselling received</b>                                        |                 |                      |                 |                      |                |                       |                |                      |                             |                       |
| 2009                                                                              | 10/220 (4.5%)   |                      | 27/317 (8.5%)   |                      | 44/146 (30.1%) |                       | 24/169 (14.2%) |                      | 14.4%                       |                       |
| 2010                                                                              | 29/215 (13.5%)  | 8.9% (3.6, 14.3)     | 13/333 (3.9%)   | -4.6% (-8.3, -.9)    | 4/170 (2.4%)   | -27.8% (-35.6, -20)   | 3/35 (8.6%)    | -5.6% (-16.3, 5)     | 7.1%                        | -10.1% (-23.1, 3.0)   |
| 2012                                                                              | 114/380 (30%)   | 25.5% (20.1, 30.8)   | 202/347 (58.2%) | 49.7% (43.7, 55.7)   | 18/114 (15.8%) | -14.3% (-24.4, -4.3)  | 18/287 (6.3%)  | -7.9% (-13.9, -2)    | 27.6%                       | 3.4% (-18.2, 25.0)    |

†Unadjusted cluster-level proportions analysed separately at each time point. ‡Change from baseline adjusted for facility size and rural/urban status. All confidence intervals are at 95% confidence level.



### Combinations of HIV/STI and MCH services received

In 2009, at least one client in every facility received each type of HIV-MCH integration investigated; that is, one or more clients received integration of HIV-FP (provision and counselling), HIV-ANC, HIV-PNC (for mother or baby), HIV-cervical screening (HIV-CS), and HIV-child health (HIV-CH). Figure 1 shows the proportion of visits in which each service combination was received at each facility. The most common integration in 2009 was HIV with child health services (up to 33% of all visits in Facility G), followed by HIV-ANC and HIV-FP (counselling or provision). Less frequent was integration of HIV services with PNC (a maximum of 6% of visits in Facility C) or cervical screening (maximum 6% of visits in Facility D).

In 2010, integration of HIV services with the MCH services no longer occurred in every facility. For example, in three facilities there were zero visits in which integration of HIV services and family planning occurred; in one intervention and all comparison facilities there was no integration of HIV services and cervical screening services; and in two comparison sites, there were no cases of HIV-ANC and HIV-PNC integration. Excluding the latter two sites, integration of HIV-ANC was the most common type of integration in 2010. Between 2009 and 2012, HIV integration with FP counselling rose in facilities A, E and F - the same facilities that experienced increases in overall HIV-MCH integration. HIV-FP counselling integration declined in the other facilities, and integration of HIV and PNC services – the focus of the intervention – remained low in all facilities over time.

### **Receipt of HIV counselling**

As a secondary outcome, we hypothesised that HIV counselling would increase in the intervention facilities. Table 2 shows that the proportion of visits in which a client received HIV counselling increased between 2009 and 2012 in two intervention (A,D) and two comparison facilities (E,F), and declined in two intervention sites (Facility C) and two comparison sites (G,H). The absolute numbers of visits that included HIV counselling are presented in Figure 2, which also shows that HIV counselling was more often provided in combination with an MCH service than alone. Specifically, HIV counselling was most often provided together with ANC, FP counselling or child health services (data not shown).

### **Evidence of an intervention effect**

As shown in Table 2 (final column), there was no statistical evidence that integration increased over time in intervention facilities as a group. On average, the intervention facilities provided integrated services in 16 percent of visits in 2009 and 14 percent in both 2010 and 2012. Nor was there statistical evidence that the proportion of visits providing HIV counselling increased in the intervention group (averaging 10% in 2009 and 9% in 2012). In the comparison group, both overall HIV-MCH integration and HIV counselling increased between 2009 and 2012 (by 5 and 13 percentage points) after experiencing a decline in 2010. For these differences, 95% confidence intervals include the null value of zero. Between the intervention and comparison groups, there was no statistical difference in change from baseline levels of HIV-MCH integration or provision of HIV counselling (data not shown).

## DISCUSSION

1  
2  
3  
4  
5  
6  
7  
8  
9  
10  
11  
12  
13  
14  
15  
16  
17  
18  
19  
20  
21  
22  
23  
24  
25  
26  
27  
28  
29  
30  
31  
32  
33  
34  
35  
36  
37  
38  
39  
40  
41  
42  
43  
44  
45  
46  
47  
48  
49  
50  
51  
52  
53  
54  
55  
56  
57  
58  
59  
60

With what we believe are among the most detailed data on HIV-MCH integration in the public sector in Africa, we have been able to assess the extent to which clients are receiving integrated services, and in which combinations over time. The client flow assessments have shown that HIV/STI services (counselling, testing and treatment) are being integrated with a wide range of MCH services, including family planning, ante-natal care, post-natal care, cervical screening and child health services. This is evidence of the capacity to integrate, in large urban facilities as well as small, rural facilities across Swaziland. It also fills a current gap in evidence – regarding the feasibility of integrating HIV services with infant/child health services, and postnatal/postpartum services. A recent systematic review of integration evaluations identified both models as ‘inadequately studied’ to date.<sup>9</sup>

Nevertheless, integration occurred in a minority of visits and varied considerably across facilities. Furthermore, the level of integration fell in three of the eight facilities between 2009 and 2012. The facility with the highest level of integration in 2009 dropped to the lowest a year later (from 49% to <2%). This may be explained by the existence of an NGO campaign to increase access to ART in the area of that facility during the 2010 assessment, as HIV treatment appears to have displaced almost all other HIV and MCH services. This suggests that integration can be susceptible to vertical programmes or competing priorities, particularly in smaller facilities where the 2010 declines in integration were steepest.

It is also possible that integration declined in settings where clients did not need HIV services with every visit. The CFA did not capture clients’ history or need for such services, and thus we

1  
2  
3 cannot interpret observed changes in their provision. For this reason we were particularly  
4  
5 interested in the provision of HIV counselling, which can be promoted regardless of need for  
6  
7 testing or treatment. HIV counselling rose in two intervention and two comparison facilities. In  
8  
9 the three sites where HIV-MCH integration rose, this appeared to be driven by an increase in  
10  
11 HIV counselling. That HIV counselling was most often provided with an MCH service rather  
12  
13 than alone suggests it has a role to play in scaling up integration, but requires a concerted  
14  
15 effort to sustain its provision.  
16  
17  
18  
19  
20  
21  
22

23 The most common form of integration observed was between HIV services and child health,  
24  
25 followed by ANC and FP. These services may offer the best opportunities for integration with  
26  
27 HIV, given most women attended for child health, ANC and FP services. This is particularly  
28  
29 encouraging in light of a recent review concluding that uptake of PMTCT in sub-Saharan  
30  
31 Africa is inadequate, but improves with an integrated family-centred approach, for example, if  
32  
33 HIV treatment is provided at antenatal clinics.<sup>7</sup>  
34  
35  
36  
37  
38  
39  
40

41 Less common was integration of HIV/STI with PNC or cervical screening, most likely due to the  
42  
43 lower number of clients receiving PNC and cervical screening relative to other services (or  
44  
45 PNC clients may have received HIV/STI testing in recent ANC visits). This suggests that  
46  
47 potential effectiveness of the Integra Initiative – which focuses on HIV-PNC integration in  
48  
49 Swaziland – may be limited until more clients attend for PNC services. And this may require  
50  
51 further investment in equipment and training for PNC (as well as cervical screening, as only  
52  
53 one facility had the capacity to offer immediate cryotherapy) as well as demand creation to  
54  
55 increase service uptake.  
56  
57  
58  
59  
60

1  
2  
3  
4  
5 The formal comparison of integration by study design (intervention versus comparison sites)  
6  
7 showed no statistical difference in HIV-MCH integration over time. Neither was there a  
8  
9 meaningful difference in the receipt of HIV counselling in the intervention group over time.  
10  
11

### 12 13 14 15 16 **Limitations and the challenges of embedding research in 'real-world' settings**

17  
18 The observed changes in levels of integration, and absence of an intervention effect, could be  
19  
20 due to a number of factors which we were unable to account for given the non-randomised  
21  
22 design, as well as challenges implementing the protocol as intended.  
23  
24

25  
26  
27  
28  
29 With regard to design: in a small country with limited number of facilities, intervention sites  
30  
31 could not be matched with similar-sized comparison facilities. This resulted in systematically  
32  
33 different groups, with intervention facilities primarily large and urban, and comparison facilities  
34  
35 mostly small and rural. Also, the comparison sites – which were determined to have no  
36  
37 provision of integration prior to the study in 2008 – were shown via the client flow assessments  
38  
39 to be offering integrated HIV-RH services by 2009. Given the ~~resulting~~ heterogeneity, and the  
40  
41 focus on a facility-specific outcome in this analysis, we felt it was more informative to compare  
42  
43 changes by facility than study design. The wide variation we observed across facilities likely  
44  
45 reflects the different capacities and infrastructure available to provide integrated services, i.e.,  
46  
47 facilities can not follow the same 'blue print' for integration, particularly given the variability in  
48  
49 facility size, client volumes and staffing levels among the eight study facilities. Detailed case  
50  
51 studies are underway to explore the role of facility differences in greater depth, including  
52  
53  
54  
55  
56  
57  
58  
59  
60

1  
2  
3 intervention dose and quality, as well as contextual information, to enhance interpretation of  
4  
5 the levels and patterns of integration revealed by the client flow assessments.  
6  
7

8  
9  
10 Some observed changes may also be due to 'seasonal' differences in 2009 and 2010.  
11  
12 Coordinating client flow assessments across eight facilities proved logistically challenging and  
13  
14 synchronicity was not always achieved as intended. In 2010, most assessments were delayed  
15  
16 until the week before Christmas (as compared to November 2009) which may account for the  
17  
18 smaller number of clients in most facilities in 2010. This timing may have affected the range of  
19  
20 services provided and may account for different patterns of integration. Smaller, rural facilities  
21  
22 – where the drops in integration were the steepest - may be impacted more than large, rural  
23  
24 sites during such holiday periods.  
25  
26  
27  
28  
29

30  
31  
32  
33 It is also possible that provision of HIV and MCH services may fluctuate frequently or  
34  
35 periodically, in patterns we could not detect from 5-day 'snapshot' assessments (regardless of  
36  
37 their specific timing). An early evaluation of CDC's 'patient flow analysis' method, conducted  
38  
39 over one day in family planning clinics in Kenya, concluded that: "the 'typical' clinic day does  
40  
41 not really exist. The client/patient load and staffing patterns are likely to vary according to  
42  
43 many factors: by day of the week, or season of the year, staff vacation or sickness, etc."<sup>14</sup>  
44  
45 Assessments were extended to five days in this study, yet, neither does the 'typical' clinic week  
46  
47 exist. It may be more informative to monitor over a longer period, for more representative  
48  
49 data. However, the 5-day assessments proved challenging and resource-intensive to  
50  
51 implement, and longer versions may be prohibitive in many settings. Previous evaluations of  
52  
53 patient flow analyses also note that data may not be representative since staff – aware of the  
54  
55  
56  
57  
58  
59  
60

1  
2  
3 assessment – may try to perform at their best.<sup>14</sup> For these reasons, strengthening routine data  
4  
5 collection systems may be preferable, but many existing systems record services individually in  
6  
7 separate registers, and are thus unable to document service integration without fundamentally  
8  
9 changing the system. It was this barrier that led us to utilise the client flow assessment.  
10  
11  
12  
13

## 14 15 16 **Conclusions**

17  
18 The client flow assessment provided rich detail about the range and combinations of services  
19  
20 received by large number of clients. This was valuable for understanding whether and how HIV  
21  
22 and MCH services are integrated in practice. The data confirm that, in a context of high HIV  
23  
24 prevalence, capacity exists in public sector services for integration of HIV services into MCH  
25  
26 care. In particular, ANC, child health and family planning provide promising entry-points for  
27  
28 reaching the largest number of women. Sustaining HIV-MCH integration may require  
29  
30 concerted effort over time. The study limitations reflect the challenges of embedding rigorous  
31  
32 research into existing and diverse facilities (i.e., 'real-world' evaluations), and difficulties in  
33  
34 recording the provision of integrated services.  
35  
36  
37  
38  
39  
40  
41  
42  
43  
44  
45  
46  
47  
48  
49  
50  
51  
52  
53  
54  
55  
56  
57  
58  
59  
60

## Acknowledgements

The authors are grateful to the clients and the Integra fieldwork team for collecting and managing the data used in this analysis. [The Integra research PI's are: Susannah Mayhew, Charlotte Warren and Anna Vassall.](#) We also acknowledge the support of the Ministry of Health and facility managers and providers for supporting and facilitating the client flow assessments.

## Author contributions

SM, JK, CW, KC, RN helped to design the data collection. JK managed the data collection. JF and WZ cleaned and managed the datasets. IB and JF led the analysis. All authors provided input into the data interpretation. IB drafted the manuscript. All authors read and commented on a complete draft.

## Data sharing

The dataset will be made available via an LSHTM repository upon completion of the Integra Initiative.

## Competing interests statement

The authors have declared that no competing interests exist.

## Funding statement

This work was supported by the Bill and Melinda Gates Foundation. No funding bodies had any role in study design, data collection and analysis, decision to publish, or preparation of the manuscript.



1  
2  
3 **REFERENCE LIST**  
4

- 5 1. McIntyre J. Mothers infected with HIV. *Br Med Bull.* 2003;67:127-35
- 6 2. PLoS Medicine Editors, . HIV in maternal and child health: concurrent crises demand  
7 cooperation. *PLoS Med.* 2010 Jul;7(7):e1000311
- 8 3. Abdool-Karim Q, Abouzahr C, Dehne K, Mangiaterra V, Moodley J, Rollins N, et al. HIV and  
9 maternal mortality: turning the tide. *Lancet.* 2010 Jun 5;375(9730):1948-9
- 10 4. Kingdom of Swaziland. Swaziland Country Report on Monitoring the Political Declaration on  
11 HIV and AIDS. Kingdom of Swaziland: 2012.
- 12 5. United Nations. Programme of Action of the United Nations International Conference on  
13 Population and Development Cairo: 1995.
- 14 6. WHO, UNAIDS, IPPF, UNFPA Linking Sexual and Reproductive Health and HIV/AIDS. Geneva:  
15 2005.
- 16 7. Wettstein C, Mugglin C, Egger M, Blaser N, Salazar L, Estill J, et al. Missed Opportunities to  
17 Prevent Mother-to-Child-Transmission in sub-Saharan Africa: Systematic Review and Meta-Analysis.  
18 *Aids.* 2012 Aug 31
- 19 8. Church K, Mayhew SH. Integration of STI and HIV prevention, care, and treatment into family  
20 planning services: a review of the literature. *Stud Fam Plann.* 2009 Sep;40(3):171-86
- 21 9. Lindegren ML, Kennedy CE, Bain-Brickley D, Azman H, Creanga AA, Butler LM, et al. Integration  
22 of HIV/AIDS services with maternal, neonatal and child health, nutrition, and family planning services.  
23 *Cochrane Database Syst Rev.* 2012;9:CD010119
- 24 10. Warren CE, Mayhew SH, Vassall A, Kimani JK, Church K, Obure CD, et al. Study protocol for the  
25 Integra Initiative to assess the benefits and costs of integrating sexual and reproductive health and HIV  
26 services in Kenya and Swaziland. *BMC Public Health.* 2012;12:973
- 27 11. Warren C, Shongwe R, Waligo A, Mahdi M, Mazia G, Narayanan I. Repositioning Postnatal Care  
28 in a High HIV Environment: Swaziland. 2008.
- 29 12. Population Council. The Balanced Counseling Strategy Plus: A toolkit for family planning  
30 service providers working in High HIV/STI prevalence settings  
31 [http://www.popcouncil.org/publications/books/2012\\_BalancedCounselingStrategyPLUS.asp2012](http://www.popcouncil.org/publications/books/2012_BalancedCounselingStrategyPLUS.asp2012).
- 32 13. Centers for Disease Control and Prevention. Available from:  
33 [http://www.cdc.gov/reproductivehealth/ProductsPubs/PFA\\_support/](http://www.cdc.gov/reproductivehealth/ProductsPubs/PFA_support/).
- 34 14. Lynam PF, Smith T, Dwyer J. Client flow analysis: a practical management technique for  
35 outpatient clinic settings. *International Journal for Quality in Health Care* 1994;6(2):179-86
- 36 15. Potisek NM, Malone RM, Shilliday BB, Ives TJ, Chelminski PR, DeWalt DA, et al. Use of patient  
37 flow analysis to improve patient visit efficiency by decreasing wait time in a primary care-based  
38 disease management programs for anticoagulation and chronic pain: A quality improvement study.  
39  
40  
41  
42  
43  
44  
45  
46  
47  
48  
49  
50  
51  
52  
53  
54  
55  
56  
57  
58  
59  
60

1  
2  
3  
4  
5  
6  
7  
8  
9  
10  
11  
12  
13  
14  
15  
16  
17  
18  
19  
20  
21  
22  
23  
24  
25  
26  
27  
28  
29  
30  
31  
32  
33  
34  
35  
36  
37  
38  
39  
40  
41  
42  
43  
44  
45  
46  
47  
48  
49  
50  
51  
52  
53  
54  
55  
56  
57  
58  
59  
60

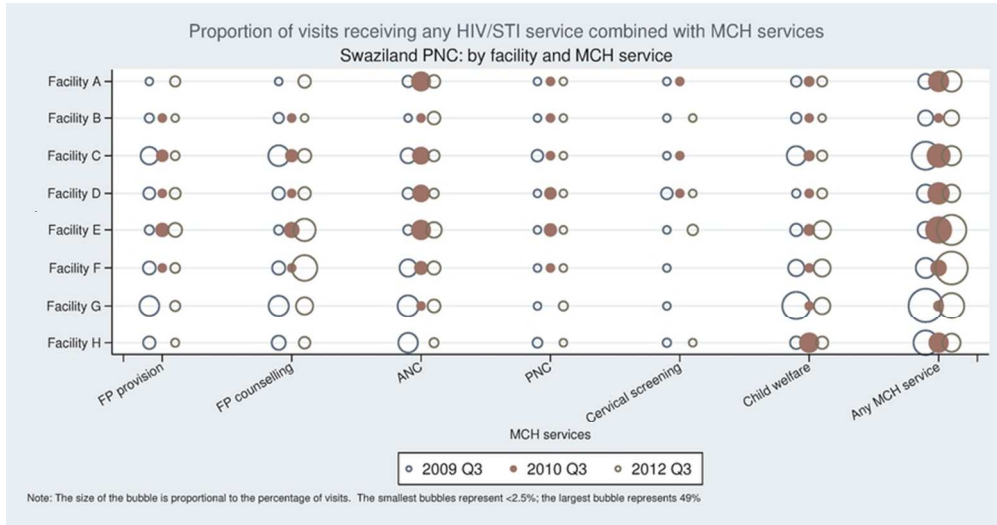

76x39mm (300 x 300 DPI)

review only

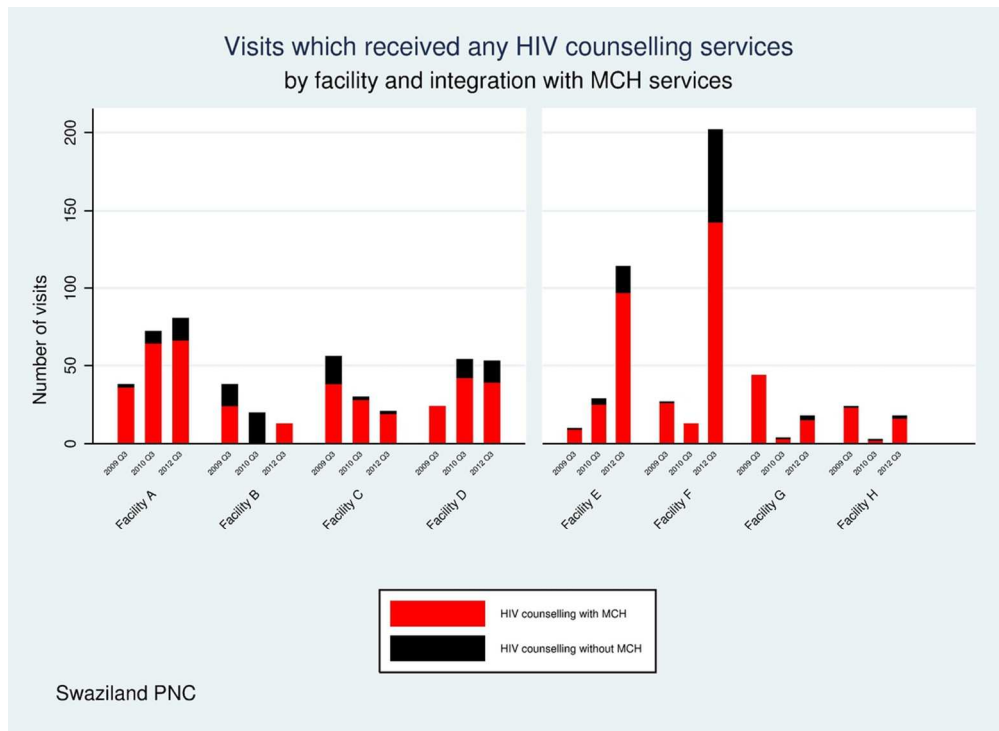

Figure 2. Number of visits receiving any HIV counselling services, by facility and integration with MCH services  
101x73mm (300 x 300 DPI)

Review only

Supplementary Table 1. Characteristics of the facilities \*

| Intervention                   | Facility A                                                                                                                                                | Facility B                                                                                                                                                                                                                                                                                      | Facility C                                                                                                                                                                         | Facility D                                                                                                                                                                       |
|--------------------------------|-----------------------------------------------------------------------------------------------------------------------------------------------------------|-------------------------------------------------------------------------------------------------------------------------------------------------------------------------------------------------------------------------------------------------------------------------------------------------|------------------------------------------------------------------------------------------------------------------------------------------------------------------------------------|----------------------------------------------------------------------------------------------------------------------------------------------------------------------------------|
| Type of facility               | Public Health Unit                                                                                                                                        | Public Health Unit                                                                                                                                                                                                                                                                              | Hospital                                                                                                                                                                           | Hospital                                                                                                                                                                         |
| Inpatient beds (#)             | 0                                                                                                                                                         | 0                                                                                                                                                                                                                                                                                               | 200                                                                                                                                                                                | 350                                                                                                                                                                              |
| Outpatient visits per year (#) | 44,280                                                                                                                                                    | 43,671                                                                                                                                                                                                                                                                                          | 22,820                                                                                                                                                                             | 219,943                                                                                                                                                                          |
| Staff (#) ^                    |                                                                                                                                                           |                                                                                                                                                                                                                                                                                                 |                                                                                                                                                                                    |                                                                                                                                                                                  |
| Clinical                       | 22                                                                                                                                                        | 20                                                                                                                                                                                                                                                                                              | 43                                                                                                                                                                                 | 214                                                                                                                                                                              |
| Technical                      | 2                                                                                                                                                         | 1                                                                                                                                                                                                                                                                                               | 93                                                                                                                                                                                 | 58                                                                                                                                                                               |
| Admin/management               | 2                                                                                                                                                         | 1                                                                                                                                                                                                                                                                                               | 3                                                                                                                                                                                  | 5                                                                                                                                                                                |
| Services provided              | FP; PNC; STI management; general SRH counselling; Ca Cx screening; PITC; ART clinic; CD4 count (samples drawn in ART unit). ART services since March 2011 | Static services: Tx of opportunistic infections, ART initiation & refills to HIV-positive PNC & ANC clients & families; ANC; FP; PNC; dental services; curatives; Lab services; child welfare clinic; STI management. Outreach clinics provide child welfare, PNC, FP, curatives, STI treatment | FP; PNC; Ca Cx Screening; PMTCT; STI management; General SRH counselling; PITC; VCT; ART clinic; CD4 count (samples drawn in PHU and ART unit); TB screening & treatment (TB unit) | FP; PNC; Ca Cx Screening; PMTCT; STI management; general SRH counselling; PITC; VCT; ART clinic; CD4 count (samples drawn in PHU & ART unit); TB screening & treatment (TB unit) |

  

| Comparison                     | Facility E                                                                                                                                                                                                    | Facility F                                                                                                                                                      | Facility G                                                                                                                                                                         | Facility H                                                                                                                                                      |
|--------------------------------|---------------------------------------------------------------------------------------------------------------------------------------------------------------------------------------------------------------|-----------------------------------------------------------------------------------------------------------------------------------------------------------------|------------------------------------------------------------------------------------------------------------------------------------------------------------------------------------|-----------------------------------------------------------------------------------------------------------------------------------------------------------------|
| Type of facility               | Health Centre                                                                                                                                                                                                 | Health Centre                                                                                                                                                   | Health Centre                                                                                                                                                                      | Health Centre                                                                                                                                                   |
| Inpatient beds (#)             | 35                                                                                                                                                                                                            | 40                                                                                                                                                              | 0                                                                                                                                                                                  | 0                                                                                                                                                               |
| Outpatient visits per year (#) | 12,770                                                                                                                                                                                                        | 63,809                                                                                                                                                          | 25,513                                                                                                                                                                             | 24,062                                                                                                                                                          |
| Staff (#)                      |                                                                                                                                                                                                               |                                                                                                                                                                 |                                                                                                                                                                                    |                                                                                                                                                                 |
| Clinical                       | 33                                                                                                                                                                                                            | 50                                                                                                                                                              | 28                                                                                                                                                                                 | 214                                                                                                                                                             |
| Technical                      | 17                                                                                                                                                                                                            | 23                                                                                                                                                              | 11                                                                                                                                                                                 | 58                                                                                                                                                              |
| Admin/management               | 2                                                                                                                                                                                                             | 27                                                                                                                                                              | 12                                                                                                                                                                                 | 5                                                                                                                                                               |
| Services provided              | FP; PNC; STI management; Maternity/Gynae; General SRH counselling; Ca CX Screening (clients referred); PITC; ART clinic; CD4 count (samples drawn in PHU, ART & TB units); TB screening & treatment (TB unit) | FP; PNC; PMTCT; STI management; general SRH counselling; PITC; VCT; ART clinic; CD4 count (samples drawn in PHU & ART unit); TB screening & treatment (TB unit) | FP; PNC; PMTCT; STI management; general SRH counselling; PITC; ART clinic; VCT (since June 2011; CD4 count (samples drawn in PHU and ART unit); TB screening & treatment (TB unit) | FP; PNC; PMTCT; STI management; general SRH counselling; PITC; VCT; ART clinic; CD4 count (samples drawn in PHU & ART unit); TB screening & treatment (TB unit) |

\*Taken from health facility assessments conducted for the Integra Initiative in 2010

^ Clinical staff include staff nurses, nursing assistants, doctors, dentists, paramedics and medical officers ; Technical staff include radiographers, medical technologists, lab technicians/assistants, phlebotomists, pharmacists, environmental health officers, mentor mothers, expert clients, cough officers, lay counsellors; Administrative staff include managers, senior nurses, matrons, health administrators, data clerks, orderlies.

Supplementary Table 24. Proportion of visits in which key HIV/STI and MCH services were received, by facility and year

| Intervention                      | Facility A  |             |             | Facility B  |             |             | Facility C  |             |             | Facility D  |             |             |
|-----------------------------------|-------------|-------------|-------------|-------------|-------------|-------------|-------------|-------------|-------------|-------------|-------------|-------------|
|                                   | 2009        | 2010        | 2012        | 2009        | 2010        | 2012        | 2009        | 2010        | 2012        | 2009        | 2010        | 2012        |
| <b>N</b>                          | 590         | 475         | 532         | 855         | 263         | 408         | 211         | 184         | 241         | 753         | 411         | 607         |
| <b>HIV/STI services received</b>  |             |             |             |             |             |             |             |             |             |             |             |             |
| HIV testing                       | 40 (6.8%)   | 39 (8.2%)   | 125 (23.5%) | 20 (2.3%)   | 6 (2.3%)    | 14 (3.4%)   | 13 (6.2%)   | 8 (4.3%)    | 15 (6.2%)   | 10 (1.3%)   | 29 (7.1%)   | 33 (5.4%)   |
| HIV counselling                   | 38 (6.4%)   | 72 (15.2%)  | 81 (15.2%)  | 38 (4.4%)   | 20 (7.6%)   | 13 (3.2%)   | 56 (26.5%)  | 30 (16.3%)  | 21 (8.7%)   | 24 (3.2%)   | 54 (13.1%)  | 53 (8.7%)   |
| HIV treatment                     | 4 (.7%)     | 9 (1.9%)    | 14 (2.6%)   | 139 (16.3%) | 21 (8%)     | 70 (17.2%)  | 29 (13.7%)  | 10 (5.4%)   | 108 (44.8%) | 65 (8.6%)   | 1 (.2%)     | 78 (12.9%)  |
| PMTCT                             | 0 (0%)      | 30 (6.3%)   | 27 (5.1%)   | 0 (0%)      | 1 (.4%)     | 24 (5.9%)   | 0 (0%)      | 7 (3.8%)    | 7 (2.9%)    | 0 (0%)      | 71 (17.3%)  | 28 (4.6%)   |
| STI counselling & testing         | 13 (2.2%)   | 0 (0%)      | 49 (9.2%)   | 65 (7.6%)   | 49 (18.6%)  | 9 (2.2%)    | 46 (21.8%)  | 1 (.5%)     | 5 (2.1%)    | 59 (7.8%)   | 5 (1.2%)    | 28 (4.6%)   |
| Any HIV/STI service               | 57 (9.7%)   | 83 (17.5%)  | 202 (38%)   | 218 (25.5%) | 74 (28.1%)  | 109 (26.7%) | 92 (43.6%)  | 47 (25.5%)  | 135 (56%)   | 138 (18.3%) | 87 (21.2%)  | 159 (26.2%) |
| <b>MCH services received</b>      |             |             |             |             |             |             |             |             |             |             |             |             |
| Family planning provision         | 176 (29.8%) | 97 (20.4%)  | 105 (19.7%) | 147 (17.2%) | 38 (14.4%)  | 63 (15.4%)  | 56 (26.5%)  | 46 (25%)    | 18 (7.5%)   | 67 (8.9%)   | 40 (9.7%)   | 100 (16.5%) |
| Family planning counselling       | 65 (11%)    | 44 (9.3%)   | 93 (17.5%)  | 84 (9.8%)   | 9 (3.4%)    | 52 (12.7%)  | 70 (33.2%)  | 19 (10.3%)  | 33 (13.7%)  | 77 (10.2%)  | 40 (9.7%)   | 130 (21.4%) |
| ANC                               | 145 (24.6%) | 74 (15.6%)  | 49 (9.2%)   | 102 (11.9%) | 19 (7.2%)   | 78 (19.1%)  | 49 (23.2%)  | 46 (25%)    | 20 (8.3%)   | 322 (42.8%) | 48 (11.7%)  | 86 (14.2%)  |
| PNC (mother or baby)              | 53 (9%)     | 35 (7.4%)   | 11 (2.1%)   | 32 (3.7%)   | 10 (3.8%)   | 16 (3.9%)   | 16 (7.6%)   | 9 (4.9%)    | 10 (4.1%)   | 54 (7.2%)   | 23 (5.6%)   | 28 (4.6%)   |
| Cervical screen                   | 2 (.3%)     | 1 (.2%)     | 3 (.6%)     | 8 (.9%)     | 0 (0%)      | 2 (.5%)     | 3 (1.4%)    | 1 (.5%)     | 0 (0%)      | 348 (46.2%) | 1 (.2%)     | 11 (1.8%)   |
| Child health (incl. Immunization) | 320 (54.2%) | 277 (58.3%) | 174 (32.7%) | 319 (37.3%) | 90 (34.2%)  | 157 (38.5%) | 93 (44.1%)  | 81 (44%)    | 47 (19.5%)  | 155 (20.6%) | 128 (31.1%) | 268 (44.2%) |
| Other reproductive health service | 1 (.2%)     | 0 (0%)      | 1 (.2%)     | 11 (1.3%)   | 7 (2.7%)    | 4 (1%)      | 2 (.9%)     | 1 (.5%)     | 5 (2.1%)    | 58 (7.7%)   | 27 (6.6%)   | 0 (0%)      |
| Any MCH service                   | 550 (93.2%) | 441 (92.8%) | 326 (61.3%) | 543 (63.5%) | 147 (55.9%) | 313 (76.7%) | 175 (82.9%) | 167 (90.8%) | 106 (44%)   | 610 (81%)   | 256 (62.3%) | 476 (78.4%) |
| Comparison                        | Facility E  |             |             | Facility F  |             |             | Facility G  |             |             | Facility H  |             |             |
|                                   | 2009        | 2010        | 2012        | 2009        | 2010        | 2012        | 2009        | 2010        | 2012        | 2009        | 2010        | 2012        |
| <b>N</b>                          | 220         | 215         | 380         | 317         | 333         | 347         | 146         | 170         | 114         | 169         | 35          | 287         |
| <b>HIV/STI services received</b>  |             |             |             |             |             |             |             |             |             |             |             |             |
| HIV testing                       | 14 (6.4%)   | 16 (7.4%)   | 33 (8.7%)   | 14 (4.4%)   | 4 (1.2%)    | 16 (4.6%)   | 19 (13%)    | 0 (0%)      | 16 (14%)    | 22 (13%)    | 0 (0%)      | 6 (2.1%)    |
| HIV counselling                   | 10 (4.5%)   | 29 (13.5%)  | 114 (30%)   | 27 (8.5%)   | 13 (3.9%)   | 202 (58.2%) | 44 (30.1%)  | 4 (2.4%)    | 18 (15.8%)  | 24 (14.2%)  | 3 (8.6%)    | 18 (6.3%)   |
| HIV treatment                     | 9 (4.1%)    | 12 (5.6%)   | 31 (8.2%)   | 18 (5.7%)   | 7 (2.1%)    | 173 (49.9%) | 41 (28.1%)  | 78 (45.9%)  | 48 (42.1%)  | 4 (2.4%)    | 0 (0%)      | 96 (33.4%)  |
| PMTCT                             | 0 (0%)      | 28 (13%)    | 50 (13.2%)  | 0 (0%)      | 18 (5.4%)   | 15 (4.3%)   | 0 (0%)      | 9 (5.3%)    | 7 (6.1%)    | 0 (0%)      | 6 (17.1%)   | 16 (5.6%)   |
| STI counselling & testing         | 8 (3.6%)    | 13 (6%)     | 43 (11.3%)  | 24 (7.6%)   | 0 (0%)      | 101 (29.1%) | 15 (10.3%)  | 0 (0%)      | 3 (2.6%)    | 25 (14.8%)  | 0 (0%)      | 7 (2.4%)    |
| Any HIV/STI service               | 30 (13.6%)  | 64 (29.8%)  | 176 (46.3%) | 57 (18%)    | 36 (10.8%)  | 253 (72.9%) | 74 (50.7%)  | 91 (53.5%)  | 69 (60.5%)  | 45 (26.6%)  | 7 (20%)     | 123 (42.9%) |
| <b>MCH services received</b>      |             |             |             |             |             |             |             |             |             |             |             |             |
| Family planning provision         | 52 (23.6%)  | 57 (26.5%)  | 100 (26.3%) | 73 (23%)    | 128 (38.4%) | 39 (11.2%)  | 47 (32.2%)  | 12 (7.1%)   | 17 (14.9%)  | 43 (25.4%)  | 8 (22.9%)   | 32 (11.1%)  |
| Family planning counselling       | 23 (10.5%)  | 64 (29.8%)  | 148 (38.9%) | 41 (12.9%)  | 38 (11.4%)  | 117 (33.7%) | 44 (30.1%)  | 6 (3.5%)    | 23 (20.2%)  | 43 (25.4%)  | 7 (20%)     | 50 (17.4%)  |
| ANC                               | 45 (20.5%)  | 41 (19.1%)  | 58 (15.3%)  | 199 (62.8%) | 83 (24.9%)  | 40 (11.5%)  | 49 (33.6%)  | 7 (4.1%)    | 13 (11.4%)  | 49 (29%)    | 0 (0%)      | 21 (7.3%)   |
| PNC (mother or baby)              | 2 (.9%)     | 17 (7.9%)   | 14 (3.7%)   | 17 (5.4%)   | 20 (6%)     | 3 (.9%)     | 5 (3.4%)    | 1 (.6%)     | 9 (7.9%)    | 11 (6.5%)   | 1 (2.9%)    | 16 (5.6%)   |
| Cervical screen                   | 2 (.9%)     | 0 (0%)      | 23 (6.1%)   | 3 (.9%)     | 0 (0%)      | 0 (0%)      | 2 (1.4%)    | 0 (0%)      | 0 (0%)      | 6 (3.6%)    | 0 (0%)      | 2 (.7%)     |
| Child health (incl. Immunization) | 135 (61.4%) | 102 (47.4%) | 118 (31.1%) | 198 (62.5%) | 111 (33.3%) | 84 (24.2%)  | 81 (55.5%)  | 43 (25.3%)  | 22 (19.3%)  | 62 (36.7%)  | 31 (88.6%)  | 89 (31%)    |
| Other reproductive health service | 0 (0%)      | 0 (0%)      | 3 (.8%)     | 0 (0%)      | 0 (0%)      | 0 (0%)      | 0 (0%)      | 0 (0%)      | 2 (1.8%)    | 1 (.6%)     | 0 (0%)      | 3 (1%)      |
| Any MCH service                   | 204 (92.7%) | 204 (94.9%) | 312 (82.1%) | 311 (98.1%) | 322 (96.7%) | 238 (68.6%) | 133 (91.1%) | 63 (37.1%)  | 61 (53.5%)  | 133 (78.7%) | 33 (94.3%)  | 165 (57.5%) |
